# Supplementary material for: An improved pig reference genome sequence to enable pig genetics and genomics research
Source: PubMed Central journal article supplement (PMC7448572; doi:10.1093/gigascience/giaa051), 2020-06-16

# GigaScience

## An improved pig reference genome sequence to enable pig genetics and genomics research

--Manuscript Draft--

|                                                    |                                                                                                                                                                                                                                                                                                                                                                                                                                                                                                                                                                                                                                                                                                                                                                                                                                                                                                                                                                                                                                                                                                                                                                 |                                            |
|----------------------------------------------------|-----------------------------------------------------------------------------------------------------------------------------------------------------------------------------------------------------------------------------------------------------------------------------------------------------------------------------------------------------------------------------------------------------------------------------------------------------------------------------------------------------------------------------------------------------------------------------------------------------------------------------------------------------------------------------------------------------------------------------------------------------------------------------------------------------------------------------------------------------------------------------------------------------------------------------------------------------------------------------------------------------------------------------------------------------------------------------------------------------------------------------------------------------------------|--------------------------------------------|
| <b>Manuscript Number:</b>                          | GIGA-D-19-00374                                                                                                                                                                                                                                                                                                                                                                                                                                                                                                                                                                                                                                                                                                                                                                                                                                                                                                                                                                                                                                                                                                                                                 |                                            |
| <b>Full Title:</b>                                 | An improved pig reference genome sequence to enable pig genetics and genomics research                                                                                                                                                                                                                                                                                                                                                                                                                                                                                                                                                                                                                                                                                                                                                                                                                                                                                                                                                                                                                                                                          |                                            |
| <b>Article Type:</b>                               | Research                                                                                                                                                                                                                                                                                                                                                                                                                                                                                                                                                                                                                                                                                                                                                                                                                                                                                                                                                                                                                                                                                                                                                        |                                            |
| <b>Funding Information:</b>                        | Biotechnology and Biological Sciences Research Council (BBS/E/D/20211550)                                                                                                                                                                                                                                                                                                                                                                                                                                                                                                                                                                                                                                                                                                                                                                                                                                                                                                                                                                                                                                                                                       | Prof Alan Archibald                        |
|                                                    | Biotechnology and Biological Sciences Research Council (BBS/E/D/10002070)                                                                                                                                                                                                                                                                                                                                                                                                                                                                                                                                                                                                                                                                                                                                                                                                                                                                                                                                                                                                                                                                                       | Prof Alan Archibald                        |
|                                                    | Biotechnology and Biological Sciences Research Council (BB/F021372/1)                                                                                                                                                                                                                                                                                                                                                                                                                                                                                                                                                                                                                                                                                                                                                                                                                                                                                                                                                                                                                                                                                           | Prof Nabeel Affara                         |
|                                                    | Biotechnology and Biological Sciences Research Council (BB/M011461/1)                                                                                                                                                                                                                                                                                                                                                                                                                                                                                                                                                                                                                                                                                                                                                                                                                                                                                                                                                                                                                                                                                           | Prof Alan Archibald                        |
|                                                    | Biotechnology and Biological Sciences Research Council (BB/M011615/1)                                                                                                                                                                                                                                                                                                                                                                                                                                                                                                                                                                                                                                                                                                                                                                                                                                                                                                                                                                                                                                                                                           | Dr Paul Flicek                             |
|                                                    | Biotechnology and Biological Sciences Research Council (BB/M01844X/1)                                                                                                                                                                                                                                                                                                                                                                                                                                                                                                                                                                                                                                                                                                                                                                                                                                                                                                                                                                                                                                                                                           | Prof Alan Archibald                        |
|                                                    | Seventh Framework Programme (KBBE222664)                                                                                                                                                                                                                                                                                                                                                                                                                                                                                                                                                                                                                                                                                                                                                                                                                                                                                                                                                                                                                                                                                                                        | Not applicable                             |
|                                                    | Wellcome Trust (WT108749/Z/15/Z)                                                                                                                                                                                                                                                                                                                                                                                                                                                                                                                                                                                                                                                                                                                                                                                                                                                                                                                                                                                                                                                                                                                                | Dr Paul Flicek                             |
|                                                    | U.S. Department of Agriculture (8042-31000-001-00-D)                                                                                                                                                                                                                                                                                                                                                                                                                                                                                                                                                                                                                                                                                                                                                                                                                                                                                                                                                                                                                                                                                                            | Dr Derek M Bickhart<br>Dr Benjamin D Rosen |
|                                                    | U.S. Department of Agriculture (5090-31000-026-00-D)                                                                                                                                                                                                                                                                                                                                                                                                                                                                                                                                                                                                                                                                                                                                                                                                                                                                                                                                                                                                                                                                                                            | Dr Derek M Bickhart                        |
|                                                    | U.S. Department of Agriculture (3040-31000-100-00-D)                                                                                                                                                                                                                                                                                                                                                                                                                                                                                                                                                                                                                                                                                                                                                                                                                                                                                                                                                                                                                                                                                                            | Dr Timothy P.L. Smith                      |
| <b>Abstract:</b>                                   | <p>The domestic pig ( <i>Sus scrofa</i> ) is important both as a food source and as a biomedical model with high anatomical and immunological similarity to humans. The draft reference genome (Sscrofa10.2) of a purebred Duroc female pig established using older clone-based sequencing methods was incomplete and unresolved redundancies, short range order and orientation errors and associated misassembled genes limited its utility. We present two annotated highly contiguous chromosome-level genome assemblies created with more recent long read technologies and a whole genome shotgun strategy, one for the same Duroc female (Sscrofa11.1) and one for an outbred, composite breed male (USMARCv1.0). Both assemblies are of substantially higher (&gt;90-fold) continuity and accuracy than Sscrofa10.2. These highly contiguous assemblies plus annotation of a further 11 short read assemblies provide an unprecedented view of the genetic make-up of this important agricultural and biomedical model species. We propose that the improved Duroc assembly (Sscrofa11.1) become the reference genome for genomic research in pigs.</p> |                                            |
| <b>Corresponding Author:</b>                       | Alan Archibald<br><br>UNITED KINGDOM                                                                                                                                                                                                                                                                                                                                                                                                                                                                                                                                                                                                                                                                                                                                                                                                                                                                                                                                                                                                                                                                                                                            |                                            |
| <b>Corresponding Author Secondary Information:</b> |                                                                                                                                                                                                                                                                                                                                                                                                                                                                                                                                                                                                                                                                                                                                                                                                                                                                                                                                                                                                                                                                                                                                                                 |                                            |
| <b>Corresponding Author's Institution:</b>         |                                                                                                                                                                                                                                                                                                                                                                                                                                                                                                                                                                                                                                                                                                                                                                                                                                                                                                                                                                                                                                                                                                                                                                 |                                            |
| <b>Corresponding Author's Secondary</b>            |                                                                                                                                                                                                                                                                                                                                                                                                                                                                                                                                                                                                                                                                                                                                                                                                                                                                                                                                                                                                                                                                                                                                                                 |                                            |

|                                            |                      |
|--------------------------------------------|----------------------|
| <b>Institution:</b>                        |                      |
| <b>First Author:</b>                       | Amanda Warr          |
| <b>First Author Secondary Information:</b> |                      |
| <b>Order of Authors:</b>                   | Amanda Warr          |
|                                            | Nabeel Affara        |
|                                            | Bronwen Aken         |
|                                            | Hamid Beiki          |
|                                            | Derek M Bickhart     |
|                                            | Konstantinos Billis  |
|                                            | William Chow         |
|                                            | Lel Eory             |
|                                            | Heather A Finlayson  |
|                                            | Paul Flicek          |
|                                            | Carlos G Girón       |
|                                            | Darren K Griffin     |
|                                            | Richard Hall         |
|                                            | Greg Hannum          |
|                                            | Thibaut Hourlier     |
|                                            | Kerstin Howe         |
|                                            | David Hume           |
|                                            | Osagie Izuogu        |
|                                            | Kristi Kim           |
|                                            | Sergey Koren         |
|                                            | Haibou Liu           |
|                                            | Nancy Manchanda      |
|                                            | Fergal J Martin      |
|                                            | Dan J Nonneman       |
|                                            | Rebecca E O'Connor   |
|                                            | Adam M Phillippy     |
|                                            | Gary A Rohrer        |
|                                            | Benjamin D Rosen     |
|                                            | Laurie A Rund        |
|                                            | Carole A Sargent     |
|                                            | Lawrence B Schook    |
|                                            | Steven G Schroeder   |
|                                            | Ariel S Schwartz     |
|                                            | Ben M Skinner        |
|                                            | Richard Talbot       |
|                                            | Elizabeth Tseng      |
|                                            | Christopher K Tuggle |
|                                            | Mick Watson          |

|                                                                                                                                                                                                                                                                                                                                                                                                                                                                                                                                     |                    |
|-------------------------------------------------------------------------------------------------------------------------------------------------------------------------------------------------------------------------------------------------------------------------------------------------------------------------------------------------------------------------------------------------------------------------------------------------------------------------------------------------------------------------------------|--------------------|
|                                                                                                                                                                                                                                                                                                                                                                                                                                                                                                                                     | Timothy P.L. Smith |
|                                                                                                                                                                                                                                                                                                                                                                                                                                                                                                                                     | Alan Archibald     |
| <b>Order of Authors Secondary Information:</b>                                                                                                                                                                                                                                                                                                                                                                                                                                                                                      |                    |
| <b>Additional Information:</b>                                                                                                                                                                                                                                                                                                                                                                                                                                                                                                      |                    |
| <b>Question</b>                                                                                                                                                                                                                                                                                                                                                                                                                                                                                                                     | <b>Response</b>    |
| Are you submitting this manuscript to a special series or article collection?                                                                                                                                                                                                                                                                                                                                                                                                                                                       | No                 |
| <p><b>Experimental design and statistics</b></p> <p>Full details of the experimental design and statistical methods used should be given in the Methods section, as detailed in our <a href="#">Minimum Standards Reporting Checklist</a>. Information essential to interpreting the data presented should be made available in the figure legends.</p> <p>Have you included all the information requested in your manuscript?</p>                                                                                                  | Yes                |
| <p><b>Resources</b></p> <p>A description of all resources used, including antibodies, cell lines, animals and software tools, with enough information to allow them to be uniquely identified, should be included in the Methods section. Authors are strongly encouraged to cite <a href="#">Research Resource Identifiers</a> (RRIDs) for antibodies, model organisms and tools, where possible.</p> <p>Have you included the information requested as detailed in our <a href="#">Minimum Standards Reporting Checklist</a>?</p> | Yes                |
| <p><b>Availability of data and materials</b></p> <p>All datasets and code on which the conclusions of the paper rely must be either included in your submission or deposited in <a href="#">publicly available repositories</a> (where available and ethically appropriate), referencing such data using</p>                                                                                                                                                                                                                        | Yes                |

a unique identifier in the references and in the “Availability of Data and Materials” section of your manuscript.

Have you have met the above requirement as detailed in our [Minimum Standards Reporting Checklist](#)?

1 An improved pig reference genome sequence to enable pig genetics and genomics research  
2  
3 Amanda Warr<sup>1</sup> ([amanda.warr@roslin.ed.ac.uk](mailto:amanda.warr@roslin.ed.ac.uk)), Nabeel Affara<sup>2</sup> ([na106@cam.ac.uk](mailto:na106@cam.ac.uk)), Bronwen Aken<sup>3</sup>  
4 ([ba1@ebi.ac.uk](mailto:ba1@ebi.ac.uk)), Hamid Beiki<sup>4</sup> ([beiki.h.m@gmail.com](mailto:beiki.h.m@gmail.com)), Derek M. Bickhart<sup>5</sup> ([derek.bickart@usda.gov](mailto:derek.bickart@usda.gov)),  
5 Konstantinos Billis<sup>3</sup> ([kbillis@ebi.ac.uk](mailto:kbillis@ebi.ac.uk)), William Chow<sup>6</sup> ([wc2@ebi.ac.uk](mailto:wc2@ebi.ac.uk)), Lel Eory<sup>1</sup>  
6 ([lel.eory@roslin.ed.ac.uk](mailto:lel.eory@roslin.ed.ac.uk)), Heather A. Finlayson<sup>1</sup> ([heatherfinlayson@gmail.com](mailto:heatherfinlayson@gmail.com)), Paul Flicek<sup>3</sup>  
7 ([flicek@ebi.ac.uk](mailto:flicek@ebi.ac.uk)), Carlos G. Girón<sup>3</sup> ([carlos@ebi.ac.uk](mailto:carlos@ebi.ac.uk)), Darren K. Griffin<sup>7</sup> ([d.k.griffin@kent.ac.uk](mailto:d.k.griffin@kent.ac.uk)),  
8 Richard Hall<sup>8</sup> ([rhall@pacificbiosciences.com](mailto:rhall@pacificbiosciences.com)), Greg Hannum<sup>9</sup> ([greg@denovium.com](mailto:greg@denovium.com)), Thibaut  
9 Hourlier<sup>3</sup> ([thibaut@ebi.ac.uk](mailto:thibaut@ebi.ac.uk)), Kerstin Howe<sup>6</sup> ([kj2@ebi.ac.uk](mailto:kj2@ebi.ac.uk)), David A. Hume<sup>1,†</sup>  
10 ([david.hume@uq.edu.au](mailto:david.hume@uq.edu.au)), Osagie Izuogu<sup>3</sup> ([osagie@ebi.ac.uk](mailto:osagie@ebi.ac.uk)), Kristi Kim<sup>8</sup> ([Kkim@verogen.com](mailto:Kkim@verogen.com)),  
11 Sergey Koren<sup>10</sup> ([sergey.koren@nih.gov](mailto:sergey.koren@nih.gov)), Haibou Liu<sup>4</sup> ([haiboul2017@gmail.com](mailto:haiboul2017@gmail.com)), Nancy Manchanda<sup>11</sup>  
12 ([nancym@iastate.edu](mailto:nancym@iastate.edu)), Fergal J. Martin<sup>3</sup> ([fergal@ebi.ac.uk](mailto:fergal@ebi.ac.uk)), Dan J. Nonneman<sup>12</sup>  
13 ([dan.nonneman@ars.usda.gov](mailto:dan.nonneman@ars.usda.gov)), Rebecca E. O'Connor<sup>7</sup> ([r.o'connor@kent.ac.uk](mailto:r.o'connor@kent.ac.uk)), Adam M. Phillippy<sup>10</sup>  
14 ([adam.phillippy@nih.gov](mailto:adam.phillippy@nih.gov)), Gary A. Rohrer<sup>12</sup> ([gary.rohrer@ars.usda.gov](mailto:gary.rohrer@ars.usda.gov)), Benjamin D. Rosen<sup>13</sup>  
15 ([ben.rosen@usda.gov](mailto:ben.rosen@usda.gov)), Laurie A. Rund<sup>14</sup> ([larund@illinois.edu](mailto:larund@illinois.edu)), Carole A. Sargent<sup>2</sup>  
16 ([cas1001@cam.ac.uk](mailto:cas1001@cam.ac.uk)), Lawrence B. Schook<sup>14</sup> ([schook@illinois.edu](mailto:schook@illinois.edu)), Steven G. Schroeder<sup>13</sup>  
17 ([steven.schroeder@usda.gov](mailto:steven.schroeder@usda.gov)), Ariel S. Schwartz<sup>9</sup> ([ariel@denovium.com](mailto:ariel@denovium.com)), Ben M. Skinner<sup>2</sup>  
18 ([b.skinner@essex.ac.uk](mailto:b.skinner@essex.ac.uk)), Richard Talbot<sup>15</sup> ([richard.talbot@roslin.ed.ac.uk](mailto:richard.talbot@roslin.ed.ac.uk)), Elizabeth Tseng<sup>8</sup>  
19 ([etseng@pacificbiosciences.com](mailto:etseng@pacificbiosciences.com)), Christopher K. Tuggle<sup>4,11</sup> ([cktuggle@iastate.edu](mailto:cktuggle@iastate.edu)), Mick Watson<sup>1</sup>  
20 ([mick.watson@roslin.ed.ac.uk](mailto:mick.watson@roslin.ed.ac.uk)), Timothy P. L. Smith<sup>12\*</sup> ([tim.smith@ars.usda.gov](mailto:tim.smith@ars.usda.gov)), Alan L. Archibald<sup>1\*</sup>  
21 ([alan.archibald@roslin.ed.ac.uk](mailto:alan.archibald@roslin.ed.ac.uk))  
22

## 23 Affiliations

24 <sup>1</sup>The Roslin Institute and Royal (Dick) School of Veterinary Studies, University of Edinburgh, Edinburgh  
25 EH25 9RG, U.K.

26 <sup>2</sup>Department of Pathology, University of Cambridge, Cambridge CB2 1QP, U.K.

27 <sup>3</sup>European Molecular Biology Laboratory, European Bioinformatics Institute, Hinxton, CB10 1SD, U.K.

28 <sup>4</sup>Department of Animal Science, Iowa State University, Ames, Iowa, U.S.A.

29 <sup>5</sup>Dairy Forage Research Center, USDA-ARS, Madison, Wisconsin, U.S.A.

30 <sup>6</sup>Wellcome Sanger Institute, Cambridge, CB10 1SA, U.K.

31 <sup>7</sup>School of Biosciences, University of Kent, Canterbury CT2 7AF, U.K.

32 <sup>8</sup>Pacific Biosciences, Menlo Park, California, U.S.A.

33 <sup>9</sup>Denovium Inc., San Diego, California, U.S.A.

34 <sup>10</sup>Genome Informatics Section, Computational and Statistical Genomics Branch, National Human  
35 Genome Research Institute, Bethesda, Maryland, U.S.A.

36 <sup>11</sup>Bioinformatics and Computational Biology Program, Iowa State University, Ames, Iowa, U.S.A.

37 <sup>12</sup>USDA-ARS U.S. Meat Animal Research Center, Clay Center, Nebraska 68933, U.S.A.

38 <sup>13</sup>Animal Genomics and Improvement Laboratory, USDA-ARS, Beltsville, Maryland, U.S.A.

39 <sup>14</sup>Department of Animal Sciences, University of Illinois, Urbana, Illinois, U.S.A.

40 <sup>15</sup>Edinburgh Genomics, University of Edinburgh, Edinburgh EH9 3FL, U.K.

41

42 † Current address: Mater Research Institute-University of Queensland, Translational Research  
43 Institute, Brisbane, QLD 4102, Australia

44

45 \*Corresponding authors: [alan.archibald@roslin.ed.ac.uk](mailto:alan.archibald@roslin.ed.ac.uk) [tim.smith@ARS.USDA.GOV](mailto:tim.smith@ARS.USDA.GOV)

46 [mick.watson@roslin.ed.ac.uk](mailto:mick.watson@roslin.ed.ac.uk)

47

48

49 **Abstract**

50 The domestic pig (*Sus scrofa*) is important both as a food source and as a biomedical model with high  
51 anatomical and immunological similarity to humans. The draft reference genome (Sscrofa10.2) of a  
52 purebred Duroc female pig established using older clone-based sequencing methods was incomplete  
53 and unresolved redundancies, short range order and orientation errors and associated misassembled  
54 genes limited its utility. We present two annotated highly contiguous chromosome-level genome  
55 assemblies created with more recent long read technologies and a whole genome shotgun strategy,  
56 one for the same Duroc female (Sscrofa11.1) and one for an outbred, composite breed male  
57 (USMARCv1.0). Both assemblies are of substantially higher (>90-fold) continuity and accuracy than  
58 Sscrofa10.2. These highly contiguous assemblies plus annotation of a further 11 short read assemblies  
59 provide an unprecedented view of the genetic make-up of this important agricultural and biomedical  
60 model species. We propose that the improved Duroc assembly (Sscrofa11.1) become the reference  
61 genome for genomic research in pigs.

62

63 **Keywords**

64 Pig genomes, reference assembly, pig, genome annotation

65

66 **Background**

67 High quality, richly annotated reference genome sequences are key resources and provide important  
68 frameworks for the discovery and analysis of genetic variation and for linking genotypes to function.

69 In farmed animal species such as the domestic pig (*Sus scrofa*) genome sequences have been integral  
70 to the discovery of molecular genetic variants and the development of single nucleotide  
71 polymorphism (SNP) chips [1] and enabled efforts to dissect the genetic control of complex traits,  
72 including responses to infectious diseases [2].

73

74 Genome sequences are not only an essential resource for enabling research but also for applications  
75 in the life sciences. Genomic selection, in which associations between thousands of SNPs and trait  
76 variation as established in a phenotyped training population are used to choose amongst selection  
77 candidates for which there are SNP data but no phenotypes, has delivered genomics-enabled genetic  
78 improvement in farmed animals [3] and plants. From its initial successful application in dairy cattle  
79 breeding, genomic selection is now being used in many sectors within animal and plant breeding,  
80 including by leading pig breeding companies [4, 5].

81

82 The domestic pig (*Sus scrofa*) has importance not only as a source of animal protein but also as a  
83 biomedical model. The choice of the optimal animal model species for pharmacological or toxicology  
84 studies can be informed by knowledge of the genome and gene content of the candidate species  
85 including pigs [6]. A high quality, richly annotated genome sequence is also essential when using gene  
86 editing technologies to engineer improved animal models for research or as sources of cells and tissue  
87 for xenotransplantation and potentially for improved productivity [7, 8].

88

89 The highly contiguous pig genome sequences reported here are built upon a quarter of a century of  
90 effort by the global pig genetics and genomics research community including the development of



91 recombination and radiation hybrid maps [9, 10], cytogenetic and Bacterial Artificial Chromosome  
92 (BAC) physical maps [11, 12] and a draft reference genome sequence [13].

93

94 The previously published draft pig reference genome sequence (Sscrofa10.2), developed under the  
95 auspices of the Swine Genome Sequencing Consortium (SGSC), has a number of significant deficiencies  
96 [14-17]. The BAC-by-BAC hierarchical shotgun sequence approach [18] using Sanger sequencing  
97 technology can yield a high quality genome sequence as demonstrated by the public Human Genome  
98 Project. However, with a fraction of the financial resources of the Human Genome Project, the  
99 resulting draft pig genome sequence comprised an assembly, in which long-range order and  
100 orientation is good, but the order and orientation of sequence contigs within many BAC clones was  
101 poorly supported and the sequence redundancy between overlapping sequenced BAC clones was  
102 often not resolved. Moreover, about 10% of the pig genome, including some important genes, were  
103 not represented (e.g. *CD163*), or incompletely represented (e.g. *IGF2*) in the assembly [19]. Whilst the  
104 BAC clones represent an invaluable resource for targeted sequence improvement and gap closure as  
105 demonstrated for chromosome X (SSCX) [20], a clone-by-clone approach to sequence improvement is  
106 expensive notwithstanding the reduced cost of sequencing with next-generation technologies.

107

108 The dramatically reduced cost of whole genome shotgun sequencing using Illumina short read  
109 technology has facilitated the sequencing of several hundred pig genomes [17, 21, 22]. Whilst a few  
110 of these additional pig genomes have been assembled to contig level, most of these genome  
111 sequences have simply been aligned to the reference and used as a resource for variant discovery.

112

113 The increased capability and reduced cost of third generation long read sequencing technology as  
114 delivered by Pacific Biosciences and Oxford Nanopore platforms, have created the opportunity to  
115 generate the data from which to build highly contiguous genome sequences as illustrated recently for  
116 cattle [23, 24]. Here we describe the use of Pacific Biosciences (PacBio) long read technology to

117 establish highly continuous pig genome sequences that provide substantially improved resources for  
118 pig genetics and genomics research and applications.

119

## 120 **Results**

121 Two individual pigs were sequenced independently: a) TJ Tabasco (Duroc 2-14) i.e. the sow that was  
122 the primary source of DNA for the published draft genome sequence (Sscrofa10.2) [13] and b)  
123 MARC1423004 which was a Duroc/Landrace/Yorkshire crossbred barrow (i.e. castrated male pig) from  
124 the USDA Meat Animal Research Center. The former allowed us to build upon the earlier draft genome  
125 sequence, exploit the associated CHORI-242 BAC library resource (<https://bacpacresources.org/>  
126 <http://bacpacresources.org/porcine242.htm>) and evaluate the improvements achieved by  
127 comparison with Sscrofa10.2. The latter allowed us to assess the relative efficacy of a simpler whole  
128 genome shotgun sequencing and Chicago Hi-Rise scaffolding strategy [25]. This second assembly also  
129 provided data for the Y chromosome, and supported comparison of haplotypes between individuals.  
130 In addition, full-length transcript sequences were collected for multiple tissues from the  
131 MARC1423004 animal, and used in annotating both genomes.

132

### 133 Sscrofa11.1 assembly

134 Approximately sixty-five fold coverage (176 Gb) of the genome of TJ Tabasco (Duroc 2-14) was  
135 generated using Pacific Biosciences (PacBio) single-molecule real-time (SMRT) sequencing technology.  
136 A total of 213 SMRT cells produced 12,328,735 subreads of average length 14,270 bp and with a read  
137 N50 of 19,786 bp (Table S1). Reads were corrected and assembled using Falcon (v.0.4.0) [26],  
138 achieving a minimum corrected read cutoff of 13 kb that provided 19-fold genome coverage for input  
139 resulting in an initial assembly comprising 3,206 contigs with a contig N50 of 14.5 Mb.

140

141 The contigs were mapped to the previous draft assembly (Sscrofa10.2) using Nucmer [27]. The long  
142 range order of the Sscrofa10.2 assembly was based on fingerprint contig (FPC) [12] and radiation  
143 hybrid physical maps with assignments to chromosomes based on fluorescent *in situ* hybridisation  
144 data. This alignment of Sscrofa10.2 and the contigs from the initial Falcon assembly of the PacBio data  
145 provided draft scaffolds that were tested for consistency with paired BAC and fosmid end sequences

146 and the radiation hybrid map [9]. The draft scaffolds also provided a framework for gap closure using  
147 PBJelly [28], or finished quality Sanger sequence data generated from CHORI-242 BAC clones from  
148 earlier work [13, 20].

149

150 Remaining gaps between contigs within scaffolds, and between scaffolds predicted to be adjacent on  
151 the basis of other available data, were targeted for gap filling with a combination of unplaced contigs  
152 and previously sequenced BACs, or by identification and sequencing of BAC clones predicted from  
153 their end sequences to span the gaps. The combination of methods filled 2,501 gaps and reduced the  
154 number of contigs in the assembly from 3,206 to 705. The assembly, Sscrofa11 (GCA\_000003025.5),  
155 had a final contig N50 of 48.2 Mb, only 103 gaps in the sequences assigned to chromosomes, and only  
156 583 remaining unplaced contigs (Table 1). Two acrocentric chromosomes (SSC16, SSC18) were each  
157 represented by single, unbroken contigs. The SSC18 assembly also includes centromeric and telomeric  
158 repeats (Tables S2, S3; Figs. S1, S2), albeit the former probably represent a collapsed version of the  
159 true centromere. The reference genome assembly was completed by adding Y chromosome  
160 sequences from other sources (GCA\_900119615.2) [20] because TJ Tabasco (Duroc 2-14) was female.  
161 The resulting reference genome sequence was termed Sscrofa11.1 and deposited in the public  
162 sequence databases (GCA\_000003025.6) (Table 1).

163

164 The medium to long range order and orientation of Sscrofa11.1 assembly was assessed by comparison  
165 to an existing radiation hybrid (RH) map [9]. The comparison strongly supported the overall accuracy  
166 of the assembly (Fig. 1a), despite the fact that the RH map was prepared from a cell line of a different  
167 individual. There is one major disagreement between the RH map and the assembly on chromosome  
168 3, which will need further investigating. The only other substantial disagreement on chromosome 9,  
169 is explained by a gap in the RH map [9]. The assignment and orientation of the Sscrofa11.1 scaffolds  
170 to chromosomes was confirmed with fluorescent *in situ* hybridisation (FISH) of BAC clones (Table S4,  
171 Fig. S3). The Sscrofa11.1 and USMARCv1.0 assemblies were searched using BLAST with sequences

172 derived from the BAC clones which had been used as probes for the FISH analyses. For most BAC  
173 clones these sequences were BAC end sequences [12], but in some cases these sequences were  
174 incomplete or complete BAC clone sequences [13, 20]. The links between the genome sequence and  
175 the BAC clones used in cytogenetic analyses by fluorescent *in situ* hybridization are summarised in  
176 Table S4. The fluorescent *in situ* hybridization results indicate areas where future assemblies might be  
177 improved. For example, the Sscrofa11.1 unplaced scaffolds contig 1206 and contig1914 may contain  
178 sequences that could be added to end of the long arms of SSC1 and SSC7 respectively.

179

180 The quality of the Sscrofa11 assembly, which corresponds to Sscrofa11.1 after the exclusion of SSCY,  
181 was assessed as described previously for the existing Sanger sequence based draft assembly  
182 (Sscrofa10.2) [14]. Alignments of Illumina sequence reads from the same female pig were used to  
183 identify regions of low quality (LQ) or low coverage (LC) (Table 2). The analysis confirms that Sscrofa11  
184 represents a significant improvement over the Sscrofa10.2 draft assembly. For example, the Low  
185 Quality Low Coverage (LQLC) proportion of the genome sequence has dropped from 33.07% to 16.3%  
186 when repetitive sequence is not masked, and falls to 1.6% when repeats are masked prior to read  
187 alignment. The remaining LQLC segments of Sscrofa11 may represent regions where short read  
188 coverage is low due to known systematic errors of the short read platform related to GC content,  
189 rather than deficiencies of the assembly.

190

191 The Sscrofa11.1 assembly was also assessed visually using gEVAL [29]. The improvement in short range  
192 order and orientation as revealed by alignments with isogenic BAC and fosmid end sequences is  
193 illustrated for a particularly poor region of Sscrofa10.2 on chromosome 12 (Fig. S4). The problems in  
194 this area of Sscrofa10.2 arose from failures to order and orient the sequence contigs and resolve the  
195 redundancies between these sequence contigs within BAC clone CH242-147O24 (FP102566.2). The  
196 improved contiguity in Sscrofa11.1 not only resolves these local order and orientation errors, but also  
197 facilitates the annotation of a complete gene model for the *ABR* locus. Further examples of

198 comparisons of Sscrofa10.2 and Sscrofa11.1 reveal improvements in contiguity, local order and  
199 orientation and gene models (Fig. S5 to S7).

200

#### 201 USMARCv1.0 assembly

202 Approximately sixty-five fold coverage of the genome of the MARC1423004 barrow was generated on  
203 a PacBio RSII instrument. The sequence was collected during the transition from P5/C3 to P6/C4  
204 chemistry, with approximately equal numbers of subreads from each chemistry. A total of 199 cells of  
205 P5/C3 chemistry produced 95.3 Gb of sequence with mean subread length of 5.1 kb and subread N50  
206 of 8.2 kb. A total of 127 cells of P6/C4 chemistry produced 91.6 Gb of sequence with mean subread  
207 length 6.5 kb and subread N50 of 10.3 kb, resulting in an overall average subread length, including  
208 data from both chemistries, of 6.4 kb. The reads were assembled using Celera Assembler 8.3rc2 [30]  
209 and Falcon (<https://pb-falcon.readthedocs.io/en/latest/about.html>). The resulting assemblies were  
210 compared and the Celera Assembler result was selected based on better agreement with a Dovetail  
211 Chicago® library [25], and was used to create a scaffolded assembly with the HiRise™ scaffolder  
212 consisting of 14,818 contigs with a contig N50 of 6.372 Mb (GenBank accession GCA\_002844635.1;  
213 Table 1). The USMARCv1.0 scaffolds were therefore completely independent of the existing  
214 Sscrofa10.2 or new Sscrofa11.1 assemblies, and they can act as supporting evidence where they agree  
215 with those assemblies. However, chromosome assignment of the scaffolds was performed by  
216 alignment to Sscrofa10.2, and does not constitute independent confirmation of this ordering. The  
217 assignment of these scaffolds to individual chromosomes was confirmed post-hoc by FISH analysis as  
218 described for Sscrofa11.1 above. The FISH analysis revealed that several of these chromosome  
219 assemblies (SSC1, 5, 6-11, 13-16) are inverted with respect to the cytogenetic convention for pig  
220 chromosome (Table S4; Figs. S3, S8 to S10). After correcting the orientation of these inverted scaffolds,  
221 there is good agreement between the USMARCv1.0 assembly and the RH map [9] (Fig. 1b).

222

#### 223 Sscrofa11.1 and USMARCv1.0 are co-linear

224 The alignment of the two PacBio assemblies reveals a high degree of agreement and co-linearity, after  
225 correcting the inversions of several USMARCv1.0 chromosome assemblies (Fig. S11). The agreement  
226 between the Sscrofa11.1 and USMARCv1.0 assemblies is also evident in comparisons of specific loci  
227 (Figs. S5 to S7) although with some differences (e.g. Fig. S6). The whole genome alignment of  
228 Sscrofa11.1 and USMARCv1.0 (Fig. S11) masks some inconsistencies that are evident when the  
229 alignments are viewed on a single chromosome-by-chromosome basis (Figs. S8 to S10). It remains to  
230 be determined whether the small differences between the assemblies represent errors in the  
231 assemblies, or true structural variation between the two individuals (see discussion of the *ERLIN1*  
232 locus below).

233

234 Pairwise comparisons amongst the Sscrofa10.2, Sscrofa11.1 and USMARCv1.0 assemblies using the  
235 Assemblytics tools [31] (<http://assemblytics.com>) revealed a peak of insertions and deletion with sizes  
236 of about 300 bp (Figs. S12a to S12c). We assume that these correspond to SINE elements. Despite the  
237 fact that the Sscrofa10.2 and Sscrofa11.1 assemblies are representations of the same pig genome,  
238 there are many more differences between these assemblies than between the Sscrofa11.1 and  
239 USMARCv1.0 assemblies. We conclude that many of the differences between the Sscrofa11.1  
240 assembly and the earlier Sscrofa10.2 assemblies represent improvements in the former. Some of the  
241 differences may indicate local differences in terms of which of the two haploid genomes has been  
242 captured in the assembly. The differences between the Sscrofa11.1 and USMARCv1.0 will represent a  
243 mix of true structural differences and assembly errors that will require further research to resolve.  
244 The Sscrofa11.1 and USMARCv1.0 assemblies were also compared to 11 Illumina short read  
245 assemblies [17] (Table S5a, b, c).

246

#### 247 Repetitive sequences, centromeres and telomeres

248 The repetitive sequence content of the Sscrofa11.1 and USMARCv1.0 was identified and  
249 characterised. These analyses allowed the identification of centromeres and telomeres for several

250 chromosomes. The previous reference genome (Sscrofa10.2) that was established from Sanger  
251 sequence data and a minipig genome (minipig\_v1.0, GCA\_000325925.2) that was established from  
252 Illumina short read sequence data were also included for comparison. The numbers of the different  
253 repeat classes and the average mapped lengths of the repetitive elements identified in these four pig  
254 genome assemblies are summarised in Figures S13 and S14, respectively.

255

256 Putative telomeres were identified at the proximal ends of Sscrofa11.1 chromosome assemblies of  
257 SSC2, SSC3, SSC6, SSC8, SSC9, SSC14, SSC15, SSC18 and SSCX (Fig S1; Table S2). Putative centromeres  
258 were identified in the expected locations in the Sscrofa11.1 chromosome assemblies for SSC1-7, SSC9,  
259 SSC13 and SSC18 (Fig S2, Table S3). For the chromosome assemblies of each of SSC8, SSC11 and SSC15  
260 two regions harbouring centromeric repeats were identified. Pig chromosomes SSC1-12 plus SSCX and  
261 SSCY are all metacentric, whilst chromosomes SSC13-18 are acrocentric. The putative centromeric  
262 repeats on SSC17 do not map to the expected end of the chromosome assembly.

263

#### 264 Completeness of the assemblies

265 The Sscrofa11.1 and USMARCv1.0 assemblies were assessed for completeness using two tools, BUSCO  
266 (Benchmarking Universal Single-Copy Orthologs) [32] and Cogent  
267 (<https://github.com/Magdoll/Cogent>). BUSCO uses a database of expected gene content based on  
268 near-universal single-copy orthologs from species with genomic data, while Cogent uses  
269 transcriptome data from the organism being sequenced, and therefore provides an organism-specific  
270 view of genome completeness. BUSCO analysis suggests both new assemblies are highly complete,  
271 with 93.8% and 93.1% of BUSCOs complete for Sscrofa11.1 and USMARCv1.0 respectively, a marked  
272 improvement on the 80.9% complete in Sscrofa10.2 and comparable to the human and mouse  
273 reference genome assemblies (Table S6).

274



275 Cogent is a tool that identifies gene families and reconstructs the coding genome using full-length,  
276 high-quality (HQ) transcriptome data without a reference genome and can be used to check  
277 assemblies for the presence of these known coding sequences. PacBio transcriptome (Iso-Seq) data  
278 consisting of high-quality isoform sequences from 7 tissues (diaphragm, hypothalamus, liver, skeletal  
279 muscle (*longissimus dorsi*), small intestine, spleen and thymus) [33] from the pig whose DNA was used  
280 as the source for the USMARCv1.0 assembly were pooled together for Cogent analysis. Cogent  
281 partitioned 276,196 HQ isoform sequences into 30,628 gene families, of which 61% had at least 2  
282 distinct transcript isoforms. Cogent then performed reconstruction on the 18,708 partitions. For each  
283 partition, Cogent attempts to reconstruct coding 'contigs' that represent the ordered concatenation  
284 of transcribed exons as supported by the isoform sequences. The reconstructed contigs were then  
285 mapped back to Sscrofa11.1 and contigs that could not be mapped or map to more than one position  
286 are individually examined. There were five genes that were present in the Iso-Seq data, but missing in  
287 the Sscrofa11.1 assembly. In each of these five cases, a Cogent partition (which consists of 2 or more  
288 transcript isoforms of the same gene, often from multiple tissues) exists in which the predicted  
289 transcript does not align back to Sscrofa11.1. NCBI-BLASTN of the isoforms from the partitions  
290 revealed them to have near perfect hits with existing annotations for *CHAMP1*, *ERLIN1*, *IL1RN*, *MB*,  
291 and *PSD4*.

292

293 *ERLIN1* is missing from its predicted location on SSC14 between *CHUK* and *CPN1* gene in Sscrofa11.1.  
294 There is good support for the Sscrofa11.1 assembly in the region from the BAC end sequence  
295 alignments suggesting this area may represent a true haplotype. Indeed, a copy number variant (CNV)  
296 nsv1302227 has been mapped to this location on SSC14 [34] and the *ERLIN1* gene sequences present  
297 in BAC clone CH242-513L2 (ENA: CT868715.3) were incorporated into the earlier Sscrofa10.2  
298 assembly. However, an alternative haplotype containing *ERLIN1* was not found in any of the  
299 assembled contigs from Falcon and this will require further investigation. The *ERLIN1* locus is present  
300 on SSC14 in the USMARCv1.0 assembly (30,107,816-30,143,074; note the USMARCv1.0 assembly of

301 SSC14 is inverted relative to Sscrofa11.1). Of eleven short read pig genome assemblies [17] that have  
302 been annotated with the Ensembl pipeline (Ensembl release 98, September 2019) *ERLIN1* sequences  
303 are present in the expected genomic context in all eleven genome assemblies. As the *ERLIN1* gene is  
304 located at the end of a contig in eight of these short read assemblies, it suggests that this region of  
305 the pig genome presents difficulties for sequencing and assembly and the absence of *ERLIN1* in the  
306 Sscrofa11.1 is more likely to be an assembly error.

307

308 The other 4 genes are annotated in neither Sscrofa10.2 nor Sscrofa11.1. Two of these genes, *IL1RN*  
309 and *PSD4*, are present in the original Falcon contigs, however they were trimmed off during the contig  
310 QC stage because of apparent abnormal Illumina, BAC and fosmid mapping in the region which was  
311 likely caused by the repetitive nature of their expected location on chromosome 3 where a gap is  
312 present. The *IL1RN* and *PSD4* genes are present in the USMARCv1.0, albeit their location is anomalous,  
313 and are also present in the 11 short read assemblies [17]. *CHAMP1* (ENSSSCG00070014091) is present  
314 in the USMARCv1.0 assembly in the sub-telomeric region of the q-arm, after correcting the inversion  
315 of the USMARCv1.0 scaffold and is also present in all 11 short read assemblies [17]. After correcting  
316 the orientation of the USMARCv1.0 chromosome 11 scaffold there is a small inversion of the distal  
317 1.07 Mbp relative to the Sscrofa11.1 assembly; this region harbours the *CHAMP1* gene. The  
318 orientation of the Sscrofa11.1 chromosome 11 assembly in this region is consistent with the  
319 predictions of the human-pig comparative map [35]. The myoglobin gene (*MB*) is present in the  
320 expected location in the USMARCv1.0 assembly flanked by *RASD2* and *RBFOX2*. Partial *MB* sequences  
321 are present distal to *RBFOX2* on chromosome 5 in the Sscrofa11.1 assembly. As there is no gap here  
322 in the Sscrofa11.1 assembly it is likely that the incomplete *MB* is a result of a misassembly in this  
323 region. This interpretation is supported by a break in the pairs of BAC and fosmid end sequences that  
324 map to this region of the Sscrofa11.1 assembly. Some of the expected gene content missing from this  
325 region of the Sscrofa11.1 chromosome 5 assembly, including *RASD2*, *HMOX1* and *LARGE1* is present  
326 on an unplaced scaffold (AEMK02000361.1). Cogent analysis also identified 2 cases of potential

327 fragmentation in the Sscrofa11.1 genome assembly that resulted in the isoforms being mapped to two  
328 separate loci, though these will require further investigation. In summary, the BUSCO and Cogent  
329 analyses indicate that the Sscrofa11.1 assembly captures a very high proportion of the expressed  
330 elements of the genome.

331

### 332 Improved annotation

333 Annotation of Sscrofa11.1 was carried out with the Ensembl annotation pipeline and released via the  
334 Ensembl Genome Browser [36] ([http://www.ensembl.org/Sus\\_scrofa/Info/Index](http://www.ensembl.org/Sus_scrofa/Info/Index)) (Ensembl release  
335 90, August 2017). Statistics for the annotation as updated in June 2019 (Ensembl release 98,  
336 September 2019) are listed in Table 3. This annotation is more complete than that of Sscrofa10.2 and  
337 includes fewer fragmented genes and pseudogenes.

338

339 The annotation pipeline utilised extensive short read RNA-Seq data from 27 tissues and long read  
340 PacBio Iso-Seq data from 9 adult tissues. This provided an unprecedented window into the pig  
341 transcriptome and allowed for not only an improvement to the main gene set, but also the generation  
342 of tissue-specific gene tracks from each tissue sample. The use of Iso-Seq data also improved the  
343 annotation of UTRs, as they represent transcripts sequenced across their full length from the polyA  
344 tract.

345

346 In addition to improved gene models, annotation of the Sscrofa11.1 assembly provides a more  
347 complete view of the porcine transcriptome than annotation of the previous assembly (Sscrofa10.2;  
348 Ensembl releases 67-89, May 2012 – May 2017) with increases in the numbers of transcripts  
349 annotated (Table 3). However, the number of annotated transcripts remains lower than in the human  
350 and mouse genomes. The annotation of the human and mouse genomes and in particular the gene  
351 content and encoded transcripts has been more thorough as a result of extensive manual annotation.

352

353 Efforts were made to annotate important classes of genes, in particular immunoglobulins and  
354 olfactory receptors. For these genes, sequences were downloaded from specialist databases and the  
355 literature in order to capture as much detail as possible (see supplementary information for more  
356 details).

357

358 These improvements in terms of the resulting annotation were evident in the results of the  
359 comparative genomics analyses run on the gene set. The previous annotation had 12,919 one-to-one  
360 orthologs with human, while the new annotation of the Sscrofa11.1 assembly has 15,544. Similarly, in  
361 terms of conservation of synteny, the previous annotation had 11,661 genes with high confidence  
362 gene order conservation scores, while the new annotation has 15,958. There was also a large  
363 reduction in terms of genes that were either abnormally short or split when compared to their  
364 orthologs in the new annotation.

365

366 The Sscrofa11.1 assembly has also been annotated using the NCBI pipeline  
367 ([https://www.ncbi.nlm.nih.gov/genome/annotation\\_euk/Sus\\_scrofa/106/](https://www.ncbi.nlm.nih.gov/genome/annotation_euk/Sus_scrofa/106/)). We have compared  
368 these two annotations. The Ensembl and NCBI annotations of Sscrofa11.1 are broadly similar (Table  
369 S7). There are 17,676 protein coding genes and 1,700 non-coding genes in common. However, 540 of  
370 the genes annotated as protein-coding by Ensembl are annotated as non-coding or pseudogenes by  
371 NCBI and 227 genes annotated as non-coding by NCBI are annotated as protein-coding (215) or as  
372 pseudogenes (12) by Ensembl. The NCBI RefSeq annotation can be visualised in the Ensembl Genome  
373 Browser by loading the RefSeq GFF3 track and the annotations compared at the individual locus level.  
374 Similarly, the Ensembl annotated genes can be visualised in the NCBI Genome Browser. Despite  
375 considerable investment there are also differences in the Ensembl and NCBI annotation of the human  
376 reference genome sequence with 20,444 and 19,755 protein-coding genes on the primary assembly,  
377 respectively. The MANE (Matched Annotation from NCBI and EMBL-EBI) project was launched to  
378 resolve these differences and identify a matched representative transcript for each human protein-

379 coding gene (<https://www.ensembl.org/info/genome/genebuild/mane.html>). To date a MANE  
380 transcript has been identified for 12,985 genes.

381

382 We have also annotated the USMARCv1.0 assembly using the Ensembl pipeline [36] and this  
383 annotation was released via the Ensembl Genome Browser  
384 ([https://www.ensembl.org/Sus\\_scrofa\\_usmarc/Info/Index](https://www.ensembl.org/Sus_scrofa_usmarc/Info/Index)) (Ensembl release 97, July 2019; see Table  
385 3 for summary statistics). More recently, we have annotated a further eleven short read pig genome  
386 assemblies [17] (Ensembl release 98, September 2019, see Tables S5c and S10 for summary statistics  
387 for the assemblies and annotation, respectively).

388

#### 389 SNP chip probes mapped to assemblies

390 The probes from four commercial SNP chips were mapped to the Sscrofa10.2, Sscrofa11.1 and  
391 USMARCv1.0 assemblies. We identified 1,709, 56, and 224 markers on the PorcineSNP60, GGP LD and  
392 80K commercial chips that were previously unmapped and now have coordinates on the Sscrofa11.1  
393 reference (Table S8). These newly mapped markers can now be imputed into a cross-platform,  
394 common set of SNP markers for use in genomic selection. Additionally, we have identified areas of the  
395 genome that are poorly tracked by the current set of commercial SNP markers. The previous  
396 Sscrofa10.2 reference had an average marker spacing of 3.57 kbp (Stdev: 26.5 kb) with markers from  
397 four commercial genotyping arrays. We found this to be an underestimate of the actual distance  
398 between markers, as the Sscrofa11.1 reference coordinates consisted of an average of 3.91 kbp  
399 (Stdev: 14.9 kbp) between the same set of markers. We also found a region of 2.56 Mbp that is  
400 currently devoid of suitable markers on the new reference.

401

402 A Spearman's rank order ( $\rho$ ) value was calculated for each assembly (alternative hypothesis:  $\rho$  is  
403 equal to zero;  $p < 2.2 \times 10^{-16}$ ): Sscrofa10.2: 0.88464; Sscrofa11.1: 0.88890; USMARCv1.0: 0.81260. This  
404 rank order comparison was estimated by ordering all of the SNP probes from all chips by their listed

405 manifest coordinates against their relative order in each assembly (with chromosomes ordered by  
406 karyotype). Any unmapped markers in an assembly were penalized by giving the marker a "-1" rank in  
407 the assembly ranking order.

408

409 In order to examine general linear order of placed markers on each assembly, the marker rank order  
410 (y axis; used above in the Spearman's rank order test) was plotted against the rank order of the probe  
411 rank order on the manifest file (x axis) (Fig. S15). The analyses revealed some interesting artefacts that  
412 suggest that the SNP manifest coordinates for the porcine 60K SNP chip are still derived from an  
413 obsolete (Sscrofa9) reference in contrast to all other manifests (Sscrofa10.2). Also, it confirms that  
414 several of the USMARCv1.0 chromosome scaffolds are inverted with respect to the canonical  
415 orientation of pig chromosomes. The large band of points at the top of the plot corresponds to marker  
416 mappings on the unplaced contigs of each assembly. These unplaced contigs often correspond to  
417 assemblies of alternative haplotypes in heterozygous regions of the reference animal [24]. Marker  
418 placement on these segments suggests that these variants are tracking different haplotypes in the  
419 population, which is the desired intent of genetic markers used in Genomic Selection.

420

421 **Discussion**

422 We have assembled a superior, extremely continuous reference assembly (Sscrofa11.1) by leveraging  
423 the excellent contig lengths provided by long reads, and a wealth of available data including Illumina  
424 paired-end, BAC end sequence, finished BAC sequence, fosmid end sequences, and the earlier curated  
425 draft assembly (Sscrofa10.2). The pig genome assemblies USMARCv1.0 and Sscrofa11.1 reported here  
426 are 92-fold to 694-fold respectively, more continuous than the published draft reference genome  
427 sequence (Sscrofa10.2) [13]. The new pig reference genome assembly (Sscrofa11.1) with its contig  
428 N50 of 48,231,277 bp and 506 gaps compares favourably with the current human reference genome  
429 sequence (GRCh38.p12) that has a contig N50 of 57,879,411 bp and 875 gaps (Table 1). Indeed,  
430 considering only the chromosome assemblies built on PacBio long read data (i.e. Sscrofa11 - the  
431 autosomes SSC1-SSC18 plus SSCX), there are fewer gaps in the pig assembly than in human reference  
432 autosomes and HSAX assemblies. Most of the gaps in the Sscrofa11.1 reference assembly are  
433 attributed to the fragmented assembly of SSCY. The capturing of centromeres and telomeres for  
434 several chromosomes (Tables S2, S3; Figs. S1, S2) provides further evidence that the Sscrofa11.1  
435 assembly is more complete. The increased contiguity of Sscrofa11.1 is evident in the graphical  
436 comparison to Sscrofa10.2 illustrated in Figure 2.

437

438 The improvements in the reference genome sequence (Sscrofa11.1) relative to the draft assembly  
439 (Sscrofa10.2) [13] are not restricted to greater continuity and fewer gaps. The major flaws in the BAC  
440 clone-based draft assembly were i) failures to resolve the sequence redundancy amongst sequence  
441 contigs within BAC clones and between adjacent overlapping BAC clones and ii) failures to accurately  
442 order and orient the sequence contigs within BAC clones. Although the Sanger sequencing technology  
443 used has a much lower raw error rate than the PacBio technology, the sequence coverage was only 4-  
444 6 fold across the genome. The improvements in continuity and quality (Table 2; Figs. S5 to S7) have  
445 yielded a better template for annotation resulting in better gene models. The Sscrofa11.1 and  
446 USMARCv1.0 assemblies are classed as 4|4|1 and 3|5|1 [ $10^X$ : N50 contig (kb);  $10^Y$ : N50 scaffold (kb);

447 Z = 1|0: assembled to chromosome level] respectively compared to Sscrofa10.2 as 1|2|1 and the  
448 human GRCh38p5 assembly as 4|4|1 (see <https://geval.sanger.ac.uk>).

449

450 The improvement in the complete BUSCO (Benchmarking Universal Single-Copy Orthologs) genes  
451 indicates that both Sscrofa11.1 and USMARCv1.0 represent superior templates for annotation of gene  
452 models than the draft Sscrofa10.2 assembly and are comparable to the finished human and mouse  
453 reference genome sequences (Table S6). Further, a companion bioinformatics analysis of available Iso-  
454 seq and companion Illumina RNA-seq data across the nine tissues surveyed has identified a large  
455 number (>54,000) of novel transcripts [33]. A majority of these transcripts are predicted to be spliced  
456 and validated by RNA-seq data. Beiki and colleagues identified 10,465 genes expressing Iso-seq  
457 transcripts that are present on the Sscrofa11.1 assembly, but which are unannotated in current NCBI  
458 or Ensembl annotations.

459

460 Whilst the alignment of the Sscrofa11.1 and USMARCv1.0 assemblies revealed that several of the  
461 USMARCv1.0 chromosome assemblies are inverted relative to Sscrofa11.1 and the cytogenetic map.  
462 Such inversions are due to the agnostic nature of genome assembly and post-assembly polishing  
463 programs. Unless these are corrected post-hoc by manual curation, they result in artefactual  
464 inversions of the entire chromosome. However, such inversions do not generally impact downstream  
465 analysis that does not involve the relative order/orientation of whole chromosomes.

466

467 Whether the differences between Sscrofa11.1 and USMARCv1.0 in order and orientation within  
468 chromosomes represent assembly errors or real chromosomal differences will require further  
469 research. The sequence present at the telomeric end of the long arm of the USMARCv1.0 chromosome  
470 7 assembly (after correcting the orientation of the USMARCv1.0 SSC7) is missing from the Sscrofa11.1  
471 SSC7 assembly, and currently located on a 3.8 Mbp unplaced scaffold (AEMK02000452.1). This  
472 unplaced scaffold harbours several genes including *DIO3*, *CKB* and *NUDT14* whose orthologues map



473 to human chromosome 14 as would be predicted from the pig-human comparative map [35]. This  
474 omission will be corrected in an updated assembly in future.

475

476 We demonstrate moderate improvements in the placement and ordering of commercial SNP  
477 genotyping markers on the Sscrofa11.1 reference genome which will impact future genomic selection  
478 programs. The reference-derived order of SNP markers plays a significant role in imputation accuracy,  
479 as demonstrated by a whole-genome survey of misassembled regions in cattle that found a correlation  
480 between imputation errors and misassemblies [37]. The gaps in SNP chip marker coverage that we  
481 identified will inform future marker selection surveys, which are likely to prioritize regions of the  
482 genome that are not currently being tracked by marker variants in close proximity to potential causal  
483 variant sites. In addition to the gaps in coverage provided by the commercial SNP chips there are  
484 regions of the genome assemblies that are devoid of annotated sequence variation as hitherto  
485 sequence variants have been discovered against incomplete genome assemblies. Thus, there is a need  
486 to re-analyse good quality re-sequence data against the new assemblies in order to provide a better  
487 picture of sequence variation in the pig genome.

488

489 The cost of high coverage whole-genome sequencing (WGS) precludes it from routine use in breeding  
490 programs. However, it has been suggested that low coverage WGS followed by imputation of  
491 haplotypes may be a cost-effective replacement for SNP arrays in genomic selection [38]. Imputation  
492 from low coverage sequence data to whole genome information has been shown to be highly accurate  
493 [39, 40]. At the 2018 World Congress on Genetics Applied to Livestock Production Aniek Bouwman  
494 reported that in a comparison of Sscrofa10.2 with Sscrofa11.1 (for SSC7 only) for imputation from  
495 600K SNP genotypes to whole genome sequence overall imputation accuracy on SSC7 improved  
496 considerably from 0.81 (1,019,754 variants) to 0.90 (1,129,045 variants) (Aniek Bouwman, pers.  
497 comm). Thus, the improved assembly may not only serve as a better template for discovering genetic  
498 variation but also have advantages for genomic selection, including improved imputation accuracy.

499

500 Advances in the performance of long read sequencing and scaffolding technologies, improvements in  
501 methods for assembling the sequence reads and reductions in costs are enabling the acquisition of  
502 ever more complete genome sequences for multiple species and multiple individuals within a species.  
503 For example, in terms of adding species, the Vertebrate Genomes Project  
504 (<https://vertebrategenomesproject.org/>) aims to generate error-free, near gapless, chromosomal  
505 level, haplotyped phase assemblies of all of the approximately 66,000 vertebrate species and is  
506 currently in its first phase that will see such assemblies created for an exemplar species from all 260  
507 vertebrate orders. At the level of individuals within a species, smarter assembly algorithms and  
508 sequencing strategies are enabling the production of high quality truly haploid genome sequences for  
509 outbred individuals [24]. The establishment of assembled genome sequences for key individuals in the  
510 nucleus populations of the leading pig breeding companies is achievable and potentially affordable.  
511 However, 10-30x genome coverage short read data generated on the Illumina platform and aligned to  
512 a single reference genome is likely to remain the primary approach to sequencing multiple individuals  
513 within farmed animal species such as cattle and pigs [21, 41].

514

515 There are significant challenges in making multiple assembled genome resources useful and  
516 accessible. The current paradigm of presenting a reference genome as a linear representation of a  
517 haploid genome of a single individual is an inadequate reference for a species. As an interim solution  
518 the Ensembl team are annotating multiple assemblies for some species such as mouse  
519 ([https://www.ensembl.org/Mus\\_musculus/Info/Strains](https://www.ensembl.org/Mus_musculus/Info/Strains)) [42]. We have implemented this solution for  
520 pig genomes, including eleven Illumina short-read assemblies [17] in addition to the reference  
521 Sscrofa11.1 and USMARCv1.0 assemblies reported here (Ensembl release 98, September 2019  
522 [https://www.ensembl.org/Sus\\_scrofa/Info/Strains?db=core](https://www.ensembl.org/Sus_scrofa/Info/Strains?db=core)). Although these additional pig genomes  
523 are highly fragmented (Table S5c) with contig N50 values from 32 – 102 kbp, the genome annotation  
524 (Table S10) provides a resource to explore pig gene space across thirteen genomes, including six Asian

525 pig genomes. The latter are important given the deep phylogenetic split of about 1 million years  
526 between European and Asian pigs [13].

527

528 The current human genome reference already contains several hundred alternative haplotypes and it  
529 is expected that the single linear reference genome of a species will be replaced with a new model –  
530 the graph genome [43-45]. These paradigm shifts in the representation of genomes present challenges  
531 for current sequence alignment tools and the ‘best-in-genome’ annotations generated thus far. The  
532 generation of high quality annotation remains a labour-intensive and time-consuming enterprise.  
533 Comparisons with the human and mouse reference genome sequences which have benefited from  
534 extensive manual annotation indicate that there is further complexity in the porcine genome as yet  
535 unannotated (Table 3). It is very likely that there are many more transcripts, pseudogenes and non-  
536 coding genes (especially long non-coding genes), to be discovered and annotated on the pig genome  
537 sequence [33]. The more highly continuous pig genome sequences reported here provide an improved  
538 framework against which to discover functional sequences, both coding and regulatory, and sequence  
539 variation. After correction for some contig/scaffold inversions in the USMARCv1.0 assembly, the  
540 overall agreement between the assemblies is high and illustrates that the majority of genomic  
541 variation is at smaller scales of structural variation. However, both assemblies still represent a  
542 composite of the two parental genomes present in the animals, with unknown effects of haplotype  
543 switching on the local accuracy across the assembly.

544

545 Future developments in high quality genome sequences for the domestic pig are likely to include: (i)  
546 gap closure of Sscrofa11.1 to yield an assembly with one contig per (autosomal) chromosome arm  
547 exploiting the isogenic BAC and fosmid clone resource as illustrated here for chromosome 16 and 18;  
548 and (ii) haplotype resolved assemblies of a Meishan and White Composite F1 crossbred pig currently  
549 being sequenced. Beyond this haplotype resolved assemblies for key genotypes in the leading pig  
550 breeding company nucleus populations and of miniature pig lines used in biomedical research can be

551 anticipated in the next 5 years. Unfortunately, some of these genomes may not be released into the  
552 public domain. The first wave of results from the Functional Annotation of ANimal Genomes (FAANG)  
553 initiative [46, 47], are emerging and will add to the richness of pig genome annotation.

554

555 In conclusion, the new pig reference genome (Sscrofa11.1) described here represents a significantly  
556 enhanced resource for genetics and genomics research and applications for a species of importance  
557 to agriculture and biomedical research.

558

559 **Methods**

560 Additional detailed methods and information on the assemblies and annotation are included in the  
561 Supplementary Materials.

562

563 Preparation of genomic DNA

564 DNA was extracted from Duroc 2-14 cultured fibroblast cells passage 16-18 using the Qiagen Blood &  
565 Cell Culture DNA Maxi Kit. DNA was isolated from lung tissue from barrow MARC1423004 using a salt  
566 extraction method.

567

568 Genome sequencing and assembly

569 Genomic DNAs from the samples described above were used to prepare libraries for sequencing on  
570 Pacific Biosciences RS II sequencer [48]. For Duroc 2-14 DNA P6/C4 chemistry was used, whilst for  
571 MARC1423004 DNA a mix of P6/C4 and earlier P5/C3 chemistry was used.

572

573 Reads from the Duroc 2-14 DNA were assembled into contigs using the Falcon v0.4.0 assembly pipeline  
574 following the standard protocol [26]. Quiver v. 2.3.0 [49] was used to correct the primary and  
575 alternative contigs. Only the primary pseudo-haplotype contigs were used in the assembly. The reads  
576 from the MARC1423004 DNA were assembled into contigs using Celera Assembler v8.3rc2 [30]. The  
577 contigs were scaffolded as described in the results section above.

578

579 Fluorescence *in situ* hybridisation

580 Metaphase preparations were fixed to slides and dehydrated through an ethanol series (2 min each  
581 in 2×SSC, 70%, 85% and 100% ethanol at RT). Probes were diluted in a formamide buffer (Cytocell)  
582 with Porcine Hybloc (Insight Biotech) and applied to the metaphase preparations on a 37°C hotplate  
583 before sealing with rubber cement. Probe and target DNA were simultaneously denatured for 2 mins  
584 on a 75°C hotplate prior to hybridisation in a humidified chamber at 37°C for 16 h. Slides were washed

585 post hybridisation in 0.4x SSC at 72°C for 2 mins followed by 2x SSC/0.05% Tween 20 at RT for 30 secs,  
586 and then counterstained using VECTASHIELD anti-fade medium with DAPI (Vector Labs). Images were  
587 captured using an Olympus BX61 epifluorescence microscope with cooled CCD camera and  
588 SmartCapture (Digital Scientific UK) system.

589

#### 590 Analysis of repetitive sequences, including telomeres and centromeres

591 Repeats were identified using RepeatMasker (v.4.0.7) (<http://www.repeatmasker.org>) with a  
592 combined repeat database including Dfam (v.20170127) [50] and RepBase (v.20170127) [51].  
593 RepeatMasker was run with “sensitive” (-s) setting using sus scrofa as the query species (-- species  
594 “sus scrofa”). Repeats which showed greater than 40% sequence divergence or were shorter than 70%  
595 of the expected sequence length were filtered out from subsequent analyses. The presence of  
596 potentially novel repeats was assessed by RepeatMasker using the novel repeat library generated by  
597 RepeatModeler (v.1.0.11) (<http://www.repeatmasker.org>).

598

599 Telomeres were identified by running Tandem Repeat Finder (TRF) [52] with default parameters apart  
600 from Mismatch (5) and Minscore (40). The identified repeat sequences were then searched for the  
601 occurrence of five identical, consecutive units of the TTAGGG vertebrate motif or its reverse  
602 complement and total occurrences of this motif was counted within the tandem repeat. Regions which  
603 contained at least 200 identical hexamer units, were >2kb of length and had a hexamer density of >0.5  
604 were retained as potential telomeres.

605

606 Centromeres were predicted using the following strategy. First, the RepeatMasker output, both  
607 default and novel, was searched for centromeric repeat occurrences. Second, the assemblies were  
608 searched for known, experimentally verified, centromere specific repeats [53, 54] in the Sscrofa11.1  
609 genome. Then the three sets of repeat annotations were merged together with BEDTools [55] (median  
610 and mean length: 786 bp and 5775 bp, respectively) and putative centromeric regions closer than

611 500 bp were collapsed into longer super-regions. Regions which were >5kb were retained as potential  
612 centromeric sites.

613

#### 614 Long read RNA sequencing (Iso-Seq)

615 The following tissues were harvested from MARC1423004 at age 48 days: brain (BioSamples:  
616 SAMN05952594), diaphragm (SAMN05952614), hypothalamus (SAMN05952595), liver  
617 (SAMN05952612), small intestine (SAMN05952615), skeletal muscle – *longissimus dorsi*  
618 (SAMN05952593), spleen (SAMN05952596), pituitary (SAMN05952626) and thymus  
619 (SAMN05952613). Total RNA from each of these tissues was extracted using Trizol reagent  
620 (ThermoFisher Scientific) and the provided protocol. Briefly, approximately 100 mg of tissue was  
621 ground in a mortar and pestle cooled with liquid nitrogen, and the powder was transferred to a tube  
622 with 1 ml of Trizol reagent added and mixed by vortexing. After 5 minutes at room temperature,  
623 0.2 mL of chloroform was added and the mixture was shaken for 15 seconds and left to stand another  
624 3 minutes at room temperature. The tube was centrifuged at 12,000 x g for 15 minutes at 4°C. The  
625 RNA was precipitated from the aqueous phase with 0.5 mL of isopropanol. The RNA was further  
626 purified with extended DNase I digestion to remove potential DNA contamination. The RNA quality  
627 was assessed with a Fragment Analyzer (Advanced Analytical Technologies Inc., IA). Only RNA samples  
628 of RQN above 7.0 were used for library construction. PacBio IsoSeq libraries were constructed per the  
629 PacBio IsoSeq protocol. Briefly, starting with 3 µg of total RNA, cDNA was synthesized by using  
630 SMARTer PCR cDNA Synthesis Kit (Clontech, CA) according to the IsoSeq protocol (Pacific Biosciences,  
631 CA). Then the cDNA was amplified using KAPA HiFi DNA Polymerase (KAPA Biotechnologies) for 10 or  
632 12 cycles followed by purification and size selection into 4 fractions: 0.8-2 kb, 2-3 kb, 3-5 kb and >5 kb.  
633 The fragment size distribution was validated on a Fragment Analyzer (Advanced Analytical  
634 Technologies Inc, IA) and quantified on a DS-11 FX fluorometer (DeNovix, DE). After a second round  
635 of large scale PCR amplification and end repair, SMRT bell adapters were separately ligated to the  
636 cDNA fragments. Each size fraction was sequenced on 4 or 5 SMRT Cells v3 using P6-C4 chemistry and

637 6 hour movies on a PacBio RS II sequencer (Pacific Bioscience, CA). Short read RNA-Seq libraries were  
638 also prepared for all nine tissue using TruSeq stranded mRNA LT kits and supplied protocol (Illumina,  
639 CA), and sequenced on a NextSeq500 platform using v2 sequencing chemistry to generate 2 x 75 bp  
640 paired-end reads.

641

642 The Read of Insert (ROI) were determined by using *consensustools.sh* in the SMRT-Analysis pipeline  
643 v2.0, with reads which were shorter than 300 bp and whose predicted accuracy was lower than 75%  
644 removed. Full-length, non-concatemer (FLNC) reads were identified by running the *classify.py*  
645 command. The cDNA primer sequences as well as the poly(A) tails were trimmed prior to further  
646 analysis. Paired-end Illumina RNA-Seq reads from each tissue sample were trimmed to remove the  
647 adaptor sequences and low-quality bases using Trimmomatic (v0.32) [56] with explicit option settings:  
648 *ILLUMINACLIP:adapters.fa: 2:30:10:1:true LEADING:3 TRAILING:3 SLIDINGWINDOW: 4:20 LEADING:3*  
649 *TRAILING:3 MINLEN:25*, and overlapping paired-end reads were merged using the PEAR software  
650 (v0.9.6) [57]. Subsequently, the merged and unmerged RNA-Seq reads from the same tissue samples  
651 were *in silico* normalized in a mode for single-end reads by using a Trinity (v2.1.1) [58] utility,  
652 *insilico\_read\_normalization.pl*, with the following settings: *--max\_cov 50 --max\_pct\_stdev 100 --*  
653 *single*. Errors in the full-length, non-concatemer reads were corrected with the preprocessed RNA-Seq  
654 reads from the same tissue samples by using *proofread* (v2.12) [59]. Untrimmed sequences with at  
655 least some regions of high accuracy in the *.trimmed.fq* files were extracted based on sequence IDs in  
656 *.untrimmed.fa* files to balance off the contiguity and accuracy of the final reads.

657

### 658 Short read RNA sequencing (RNA-Seq)

659 In addition to the Illumina short read RNA-seq data generated from MARC1423004 and used to correct  
660 the Iso-Seq data (see above), Illumina short read RNA-seq data (PRJEB19386) were also generated  
661 from a range of tissues from four juvenile Duroc pigs (two male, two female) and used for annotation  
662 as described below. Extensive metadata with links to the protocols for sample collection and



663 processing are linked to the BioSample entries under the Study Accession PRJEB19386. The tissues  
664 sampled are listed in Table S9. Sequencing libraries were prepared using a ribodepletion TruSeq  
665 stranded RNA protocol and 150 bp paired end sequences generated on the Illumina HiSeq 2500  
666 platform in rapid mode.

667

#### 668 Annotation

669 The assembled genomes were annotated using the Ensembl pipelines [36] as detailed in the  
670 Supplementary materials. The Iso-Seq and RNA-Seq data described above were used to build gene  
671 models.

672

#### 673 Mapping SNP chip probes

674 The probes from four commercial SNP chips were mapped to the Sscrofa10.2, Sscrofa11.1 and  
675 USMARCv1.0 assemblies using BWA MEM [60] and a wrapper script  
676 ([https://github.com/njdbickhart/perl\\_toolchain/blob/master/assembly\\_scripts/alignAndOrderSnPr  
678 obes.pl](https://github.com/njdbickhart/perl_toolchain/blob/master/assembly_scripts/alignAndOrderSnPr<br/>677 obes.pl)). Probe sequence was derived from the marker manifest files that are available on the provider  
679 websites: Illumina PorcineSNP60 ([https://emea.illumina.com/products/by-type/microarray-  
681 kits/porcine-snp60.html](https://emea.illumina.com/products/by-type/microarray-<br/>680 kits/porcine-snp60.html)) [1]; Affymetrix Axiom™ Porcine Genotyping Array  
682 (<https://www.thermofisher.com/order/catalog/product/550588>); Gene Seek Genomic Profiler  
683 Porcine – HD beadChip (<http://genomics.neogen.com/uk/ggp-porcine>); Gene Seek Genomic Profiler  
684 Porcine v2– LD Chip (<http://genomics.neogen.com/uk/ggp-porcine>). In order to retain marker  
685 manifest coordinate information, each probe marker name was annotated with the chromosome and  
686 position of the marker’s variant site from the manifest file. All mapping coordinates were tabulated  
687 into a single file, and were sorted by the chromosome and position of the manifest marker site. In  
688 order to derive and compare relative marker rank order, a custom Perl script  
689 ([https://github.com/njdbickhart/perl\\_toolchain/blob/master/assembly\\_scripts/pigGenomeSNPSortR](https://github.com/njdbickhart/perl_toolchain/blob/master/assembly_scripts/pigGenomeSNPSortR)

688 [ankOrder.pl](#)) was used to sort and number markers based on their mapping locations in each

689 assembly.

690

691 **Supplementary materials**

692 Supplementary materials for this article include:

693 Supplementary Methods and Information

694 Table S1. Pacific Biosciences read statistics.

695 Table S2. Predicted telomeres.

696 Table S3. Predicted centromeres.

697 Table S4. Assigning scaffolds to chromosomes.

698 Table S5. Assemblytics comparisons.

699 Table S6. BUSCO results.

700 Table S7. Annotation statistics. (Ensembl-NCBI comparison)

701 Table S8. Commercial SNP chip probes.

702 Table S9. Tissue samples.

703 Table S10. Ensembl annotation statistics for 13 pig genome assemblies

704 Figure S1. Predicted telomeres.

705 Figure S2. Predicted centromeres.

706 Figure S3. Fluorescent *in situ* hybridisation assignments.

707 Fig. S4. Improvement in local order and orientation and reduction in redundancy.

708 Fig. S5. Assembly comparisons in gEVAL (SSC15).

709 Fig. S6. Assembly comparisons in gEVAL (SSC5).

710 Fig. S7. Assembly comparisons in gEVAL (SSC18).

711 Fig. S8. Order and orientation of SSC18 assemblies.

712 Fig. S9. Order and orientation of SSC7 assemblies.

713 Fig. S10. Order and orientation of SSC8 assemblies.

714 Fig. S11. Assembly alignments.

715 Figure S12. Assemblytics results.

716 Figure S13. Counts of repetitive elements in four pig assemblies.

717 Figure S14. Average mapped length of repetitive elements in four pig genomes.

718 Figure S15. Assembly SNP rank concordance versus reported chromosomal location.

719

720 **References**

- 721 1. Ramos AM, Crooijmans RPMA, Affara NA, Amaral AJ, Archibald AL, Beever JE, et al. Design of a  
722 high density SNP genotyping assay in the pig using SNPs identified and characterized by next  
723 generation sequencing technology. *PLoS One* 2009;4:e6524.
- 724 2. Hu ZL, Park CA, ReecyJM, Developmental progress and current status of the Animal QTLdb. *Nucleic*  
725 *Acids Res.* 2016;44:D827–33.
- 726 3. Meuwissen T, Hayes, B, Goddard M, Accelerating Improvement of Livestock with Genomic  
727 Selection. *Annu. Rev. Anim. Biosci.* 2013;1:221–37.
- 728 4. Christensen OF, Madsen P, Nielsen B, Ostersen T, Su G, Single-step methods for genomic  
729 evaluation in pigs. *Animal* 2012;6:1565–71.
- 730 5. Cleveland M, Hickey JM, Practical implementation of cost-effective genomic selection in  
731 commercial pig breeding using imputation. *J. Anim. Sci.* 2013;91:3583–92.
- 732 6. Vamathevan JJ, Hall MD, Hasan S, Woollard PM, Xu M, Yang Y, et al. Minipig and beagle animal  
733 model genomes aid species selection in pharmaceutical discovery and development. *Toxicol. Appl.*  
734 *Pharmacol.* 2013;270:149–57.
- 735 7. Klymiuk N, Seeliger F, Bohlooly M, Blutke A, Rudmann DG, Wolf E, Tailored Pig Models for  
736 Preclinical Efficacy and Safety Testing of Targeted Therapies. *Toxicol. Pathol.* 2016;44:346–57.
- 737 8. Wells KD, Prather RS, Genome-editing technologies to improve research, reproduction, and  
738 production in pigs. *Mol. Reprod. Dev.* 2017;84:1012–7.
- 739 9. Servin B, Faraut T, Iannuccelli N, Zelenika D, Milan D, High-resolution autosomal radiation hybrid  
740 maps of the pig genome and their contribution to the genome sequence assembly. *BMC Genomics*  
741 2012;13:585.
- 742 10. Tortereau F, Servin B, Frantz L, Megens HJ, Milan D, Rohrer G, et al. A high density recombination  
743 map of the pig reveals a correlation between sex-specific recombination and GC content. *BMC*  
744 *Genomics* 2012;13:586.

- 745 11. Yerle M, Lahbib-Mansais Y, Mellink C, Goureau A, Pinton P, Echard G, et al. The PiGMaP  
746 consortium cytogenetic map of the domestic pig (*Sus scrofa domestica*). *Mamm. Genome*  
747 1995;6:176–86.
- 748 12. Humphray SJ, Scott CE, Clark R, Marron B, Bender C, Camm N, et al. A high utility integrated map  
749 of the pig genome. *Genome Biol.* 2017;8:R139.
- 750 13. Groenen MAM, Archibald AL, Uenishi H, Tuggle CK, Takeuchi Y, Rothschild MF, et al. Analyses of  
751 pig genomes provide insight into porcine demography and evolution. *Nature* 2012;491:393–8.
- 752 14. Warr A, Robert C, Hume D, Archibald AL, Deeb N, Watson M. Identification of Low-Confidence  
753 Regions in the Pig Reference Genome (*Sscrofa* 10.2). *Front. Genet.* 2015;6:338.
- 754 15. O’Connor RE, Fonseka G, Frodsham R, Archibald AL, Lawrie M, Walling GA et al. Isolation of  
755 subtelomeric sequences of porcine chromosomes for translocation screening reveals errors in the  
756 pig genome assembly. *Anim. Genet.* 2017;48:395–403.
- 757 16. Dawson HD, Chen C, Gaynor B, Shao J, Urban Jr. JF. The porcine translational research database:  
758 a manually curated, genomics and proteomics-based research resource. *BMC Genomics*  
759 2017;18:643.
- 760 17. Li M, Chen L, Tian S, Lin Y, Tang Q, Zhou X, et al. Comprehensive variation discovery and recovery  
761 of missing sequence in the pig genome using multiple de novo assemblies. *Genome Res.*  
762 2017;27:865–74.
- 763 18. Schook LB, Beever JE, Rogers J, Humphray S, Archibald A, Chardon P, et al. Swine Genome  
764 Sequencing Consortium (SGSC): A strategic roadmap for sequencing the pig genome. *Comparative*  
765 *and Functional Genomics* 2005;6:251–5.
- 766 19. Robert C, Fuentes-Utrilla P, Troup K, Loecherbach J, Turner F, Talbot R, et al. Design and  
767 development of exome capture sequencing for the domestic pig (*Sus scrofa*). *BMC Genomics*  
768 2014;15:550.
- 769 20. Skinner BM, Sargent CA, Churcher C, Hunt T, Herrero J, Loveland JE, et al. The pig X and Y  
770 Chromosomes: structure, sequence, and evolution. *Genome Res.* 2016;26:130–9.

- 771 21. Frantz LAF, Schraiber JG, Madsen O, Megens HJ, Cagan A, Bosse M, et al. Evidence of long-term  
772 gene flow and selection during domestication from analyses of Eurasian wild and domestic pig  
773 genomes. *Nat. Genet.* 2015;47:1141-8.
- 774 22. Groenen MAM. A decade of pig genome sequencing: a window on pig domestication and  
775 evolution. *Genet. Sel. Evol.* 2016;48:23.
- 776 23. van Dijk EL, Jaszczyszyn Y, Naquin D, Thermes C. The Third Revolution in Sequencing Technology.  
777 *Trends in Genetics* 2018;34:666-81.
- 778 24. Koren S, Rhie A, Walenz BP, Diltthey AT, Bickhart DM, Kingan SB, et al. De novo assembly of  
779 haplotype-resolved genomes with trio binning. *Nat. Biotechnol.* 2018;36:1174-82.
- 780 25. Putnam NH, O'Connell BL, Stites JC, Rice BJ, Blanchette M, Calef R, et al. Chromosome-scale  
781 shotgun assembly using an in vitro method for long-range linkage. *Genome Res.* 2016;26:342–50.
- 782 26. Chin CS, Peluso P, Sedlazeck FJ, Nattestad M, Concepcion GT, Clum A, et al. Phased diploid genome  
783 assembly with single-molecule real-time sequencing. *Nat. Methods* 2016;13:1050–4.
- 784 27. Kurtz S, Phillippy A, Delcher AL, Smoot M, Shumway M, Antonescu C, et al. Versatile and open  
785 software for comparing large genomes. *Genome Biol.* 2004;5:R12.
- 786 28. English AC, Richards S, Han Y, Wang M, Lee V, Qu J, et al. Mind the Gap: Upgrading Genomes with  
787 Pacific Biosciences RS Long-Read Sequencing Technology. *PLoS One* 2012;7:e47768.
- 788 29. Chow W, Brugger K, Caccamo M, Sealy I, Torrance J, Howe K. gEVAL-a web-based browser for  
789 evaluating genome assemblies. *Bioinformatics* 2016;32:2508–10.
- 790 30. Berlin K, Koren S, Chin CS, Drake JP, Landolin JM, Phillippy AM. Assembling large genomes with  
791 single-molecule sequencing and locality-sensitive hashing. *Nat. Biotechnol.* 2015;33:623–30.
- 792 31. Nattestad M, Schatz MC. Assemblytics: A web analytics tool for the detection of variants from an  
793 assembly. *Bioinformatics* 2016;32:3021-3.
- 794 32. Simão FA, Waterhouse RM, Ioannidis P, Kriventseva EV, Zdobnov EM. BUSCO: Assessing genome  
795 assembly and annotation completeness with single-copy orthologs. *Bioinformatics* 2015;31:3210–  
796 2.

- 797 33. Beiki H, Liu H, Manchanda N, Nonneman D, Smith TPL, Reecy JM et al. Improved annotation of the  
798 domestic pig genome through integration of Iso-Seq and RNA-seq data. *BMC Genomics*  
799 2019;20:344.
- 800 34. Long Y, Su Y, Ai H, Zhang Z, Yang B, Ruan G, et al. A genome-wide association study of copy number  
801 variations with umbilical hernia in swine. *Anim. Genet.* 2016;47:298–305.
- 802 35. Meyers SN, Rogatcheva MB, Larkin DM, Yerle M, Milan D, Hawken RJ, et al. Piggy-BACing the  
803 human genome: II. A high-resolution, physically anchored, comparative map of the porcine  
804 autosomes. *Genomics* 2005;86:739-52.
- 805 36. Cunningham F, Achuthan P, Akanni W, Allen J, Amode MR, Armean IM, et al. Ensembl 2019.  
806 *Nucleic Acids Res.* 2019;47(D1):D745-51.
- 807 37. Utsunomiya ATH, Santos DJ, Boison SA, Utsunomiya YT, Milanese M, Bickhart DM, et al. Revealing  
808 misassembled segments in the bovine reference genome by high resolution linkage disequilibrium  
809 scan. *BMC Genomics* 2016;17:705.
- 810 38. Hickey JM. Sequencing millions of animals for genomic selection 2.0. *Journal of Animal Breeding*  
811 *and Genetics* 2013;130:331-2.
- 812 39. Le SQ, Durbin R. SNP detection and genotyping from low-coverage sequencing data on multiple  
813 diploid samples. *Genome Res.* 2011;21:952-60.
- 814 40. Li Y, Sidore C, Kang HM, Boehnke M, Abecasis GR. Low-coverage sequencing: Implications for  
815 design of complex trait association studies. *Genome Res.* 2011;21:940-51.
- 816 41. Daetwyler HD, Capitan A, Pausch H, Stottthard P, van Binsbergen R, Brøndum RF, et al. Whole-  
817 genome sequencing of 234 bulls facilitates mapping of monogenic and complex traits in cattle.  
818 *Nat. Genet.* 2014;46:858-65.
- 819 42. Lilue J, Doran AG, Fiddes IT, Abrudan M, Armstrong J, Bennett R, et al. Sixteen diverse laboratory  
820 mouse reference genomes define strain-specific haplotypes and novel functional loci. *Nat. Genet.*  
821 2018;50:1574-83.



- 822 43. Baier U, Beller T, Ohlebusch E. Graphical pan-genome analysis with compressed suffix trees and  
823 the Burrows-Wheeler transform. *Bioinformatics* 2015;32:497–504.
- 824 44. Chaisson MJP, Wilson RK, Eichler EE. Genetic variation and the de novo assembly of human  
825 genomes. *Nat. Rev. Genet.* 2015;16:627–40.
- 826 45. Garrison E, Sirén J, Novak AM, Hickey G, Eizenga JM, Dawson ET, et al. Variation graph toolkit  
827 improves read mapping by representing genetic variation in the reference. *Nature Biotechnology*  
828 2018;36:875-9.
- 829 46. Andersson L, Archibald AL, Bottema CD, Brauning R, Burgess SC, Burt DW, et al. Coordinated  
830 international action to accelerate genome-to-phenome with FAANG, the Functional Annotation  
831 of Animal Genomes project. *Genome Biol.* 2015;16:57.
- 832 47. Foissac S, Djebali S, Munyard K, Vialaneix N, Rau A, Muret K, et al. Livestock genome annotation:  
833 transcriptome and chromatin structure profiling in cattle, goat and pig. *bioRxiv* (2018).  
834 doi:<https://doi.org/10.1101/316091>
- 835 48. Pendleton M, Sebra R, Pang AA, Ummat A, Franzen O, Rausch T, et al. Assembly and diploid  
836 architecture of an individual human genome via single-molecule technologies. *Nat. Methods*  
837 2015;12:780–6.
- 838 49. Chin CS, Alexander DH, Marks P, Klammer AA, Drake J, Heiner C, et al. Nonhybrid, finished  
839 microbial genome assemblies from long-read SMRT sequencing data. *Nat. Methods* 2013;10:563-  
840 9.
- 841 50. Hubley R, Finn RD, Clements J, Eddy SR, Jones TA, Bao W, et al. The Dfam database of repetitive  
842 DNA families. *Nucleic Acids Res.* 2016;44:D81–9.
- 843 51. Bao W, Kojima KK, Kohany O. Repbase Update, a database of repetitive elements in eukaryotic  
844 genomes. *Mobile DNA* 6(1). doi: 10.1186/s13100-015-0041-9. (2015).
- 845 52. Benson G. Tandem repeats finder: A program to analyze DNA sequences. *Nucleic Acids Res.*  
846 1999;27:573–80.

- 847 53. Miller JR, Hindkjær J, Thomsen PD. A chromosomal basis for the differential organization of a  
848 porcine centromere-specific repeat. *Cytogenet. Cell Genet.* 1993;62:37–41.
- 849 54. Riquet J, Mulsant P, Yerle M, Cristobal-Gaudy MS, Le Tissier P, Milan D, et al. Sequence analysis  
850 and genetic mapping of porcine chromosome 11 centromeric S0048 marker. *Cytogenet. Cell*  
851 *Genet.* 1996;74:127-32.
- 852 55. Quinlan AR, Hall IM. BEDTools: A flexible suite of utilities for comparing genomic features,  
853 *Bioinformatics* 2010;26:841–2.
- 854 56. Bolger AM, Lohse M, Usadel B. Trimmomatic: A flexible trimmer for Illumina sequence data.  
855 *Bioinformatics* 2014;30:2114–20.
- 856 57. Zhang J, Kobert K, Flouri T, Stamatakis A. PEAR: A fast and accurate Illumina Paired-End read  
857 mergeR. *Bioinformatics* 2014;30:614–20.
- 858 58. Grabherr MG, Haas BJ, Yassour M, Levin JZ, Thompson DA, Amit I, et al. Full-length transcriptome  
859 assembly from RNA-Seq data without a reference genome. *Nat Biotechnol* 2011;29:644–52.
- 860 59. Hackl T, Hedrich R, Schultz J, Förster F. Proovread: Large-scale high-accuracy PacBio correction  
861 through iterative short read consensus. *Bioinformatics* 2014;30:3004–11.
- 862 60. Li H, Durbin R. Fast and accurate short read alignment with Burrows-Wheeler transform.  
863 *Bioinformatics* 2009;25:1754-60.
- 864 61. Robinson JT, Thorvaldsdóttir H, Winckler W, Guttman M, Lander ES, Getz G, et al. Integrative  
865 genomics viewer. *Nat. Biotechnol.* 2011;29:24–6.
- 866 62. Koren S, Walenz BP, Berlin K, Miller JR, Bergman NH, Phillippy AM. Canu: Scalable and accurate  
867 long-read assembly via adaptive  $\kappa$ -mer weighting and repeat separation. *Genome Res.*  
868 2017;27:722–36.
- 869 63. Li H. Aligning sequence reads, clone sequences and assembly contigs with BWA-MEM.  
870 *ArXiv:1303.3997v1 [q-bio.GN]* (2013).

- 871 64. Walker BJ, Abeel T, Shea T, Priest M, Abouelliel A, Sakthikumar S, et al. Pilon: An integrated tool  
872 for comprehensive microbial variant detection and genome assembly improvement. *PLoS ONE*  
873 2014;9:e112963.
- 874 65. Anderson SI, Lopez-Corrales NL, Gorick B, Archibald AL. A large-fragment porcine genomic library  
875 resource in a BAC vector. *Mammalian Genome* 2000;11:811–4.
- 876 66. Morgulis A, Gertz EM, Schäffer AA, Agarwala R. A Fast and Symmetric DUST Implementation to  
877 Mask Low-Complexity DNA Sequences. *J Comp Biol* 2006;13:1028-40.
- 878 67. Down TA, Hubbard TJP. Computational detection and location of transcription start sites in  
879 mammalian genomic DNA. *Genome Res* 2002;12:458–61.
- 880 68. Lowe TM, Eddy SR. TRNAscan-SE: A program for improved detection of transfer RNA genes in  
881 genomic sequence. *Nucleic Acids Res* 1996;25:955–64.
- 882 69. Burge C, Karlin S. Prediction of complete gene structures in human genomic DNA. *J Mol Biol*  
883 1997;268:78–94.
- 884 70. O’Leary NA, Wright MW, Brister JR, Ciufu S, Haddad D, McVeigh R, et al. Reference sequence  
885 (RefSeq) database at NCBI: current status, taxonomic expansion, and functional annotation.  
886 *Nucleic Acids Res* 2016;44:D733-45.
- 887 71. Slater GSC, Birney E. Automated generation of heuristics for biological sequence comparison. *BMC*  
888 *Bioinformatics* 2005;6:31.
- 889 72. Frankish A, Diekhans M, Ferreira AM, Johnson R, Jungreis I, Loveland J, et al. GENCODE reference  
890 annotation for the human and mouse genomes. *Nucleic Acids Res* 2019;47:D766-73.
- 891 73. Li H. Minimap2: pairwise alignment for nucleotide sequences. *Bioinformatics* 2018;34:3094-3100.
- 892 74. She R, Chu JS, Uyar B, Wang J, Wang K, Chen N. genBlastG: Using BLAST searches to build  
893 homologous gene models. *Bioinformatics* 2011;27:2141–3.
- 894 75. Lefranc MP, Giudicelli V, Duroux P, Jabado-Michaloud J, Folch G, Aouinti S, et al. IMGT®, the  
895 international ImMunoGeneTics information system® 25 years on. *Nucleic Acids Res*  
896 2015;43:D413–22.

- 897 76. Lewis SE, Searle SMJ, Harris N, Gibson M, Iyer V, Richter J, et al. Apollo: a sequence annotation  
898 editor. *Genome Biol* 2002;3:research0082.1.
- 899 77. Griffiths-Jones S, Bateman A, Marshall M, Khanna A, Eddy SR. Rfam: An RNA family database',  
900 *Nucleic Acids Res* 2003;31:439–41.
- 901 78. Griffiths-Jones S, Grocock RJ, van Dongen S, Bateman A, Enright AJ. miRBase: microRNA  
902 sequences, targets and gene nomenclature. *Nucleic Acids Res* 2006;34:D140–4.
- 903 79. Lorenz R, Bernhart SH, Höner Zu Siederdisen C, Tafer H, Flamm C, Stadler PF, et al. ViennaRNA  
904 Package 2.0. *Algorithms Mol Biol* 2011;6:26.
- 905 80. Nawrocki EP, Eddy SR. Infernal 1.1: 100-fold faster RNA homology searches. *Bioinformatics*  
906 2013;29:2933-5.
- 907 81. Papatheodorou I, Fonesca NA, Keays M, Tang YA, Barrera E, Bazant W, et al. Expression Atlas:  
908 Gene and protein expression across multiple studies and organisms. *Nucleic Acids Res*  
909 2018;46:D246-51.
- 910

911 **Acknowledgements**

912 We are grateful to Chris Tyler-Smith (Wellcome Trust Sanger Institute) for sharing the SSCY sequence  
913 data for Sscrofa11.1. **Funding:** We are grateful for funding support from the i) Biotechnology and  
914 Biological Sciences Research Council (Institute Strategic Programme grants: BBS/E/D/20211550,  
915 BBS/E/D/10002070; and response mode grants: BB/F021372/1, BB/M011461/1, BB/M011615/1,  
916 BB/M01844X/1); ii) European Union through the Seventh Framework Programme Quantomics  
917 (KBBE222664); iii) University of Cambridge, Department of Pathology; iv) Wellcome Trust:  
918 WT108749/Z/15/Z; v) European Molecular Biology Laboratory; and vi) the Roslin Foundation. In  
919 addition HL and HB were supported by USDA NRSP-8 Swine Genome Coordination funding; SK and  
920 AMP were supported by the Intramural Research Program of the National Human Genome Research  
921 Institute, US National Institutes of Health; D.M.B was supported by USDA CRIS projects 8042-31000-  
922 001-00-D and 5090-31000-026-00-D. B.D.R was supported by USDA CRIS project 8042-31000-001-00-  
923 D. T.P.L.S. was supported by USDA CRIS project 3040-31000-100-00-D. This work used the  
924 computational resources of the NIH HPC Biowulf cluster (<https://hpc.nih.gov>); and the Iowa State  
925 University Lightning3 and ResearchIT clusters. The Ceres cluster (part of the USDA SCInet Initiative)  
926 was used to analyse part of this dataset.

927

928 **Author contributions**

929 A.L.A. and T.P.L.S. conceived, coordinated and managed the project; A.L.A., P.F., D.A.H., T.P.L.S. M.W.  
930 supervised staff and students performing the analyses; D.J.N., L.R., L.B.S., T.P.L.S. provided biological  
931 resources; R.H., K.S.K. and T.P.L.S. generated PacBio sequence data; H.A.F., T.P.L.S. and R.T. generated  
932 Illumina WGS and RNA-Seq data; N.A.A., C.A.S., B.M.S. provided SSCY assemblies; D.J.N, and T.P.L.S.  
933 generated Iso-Seq data; G.H., R.H., S.K., A.M.P., A.S.S, A.W. generated sequence assemblies; A.W.  
934 polished and quality checked Sscrofa11.1; W.C., G.H., K.H., S.K., B.D.R., A.S.S., S.G.S., E.T. performed  
935 quality checks on the sequence assemblies; R.E.O’C. and D.K.G. performed cytogenetics analyses; L.E.  
936 analysed repeat sequences; H.B., H.L., N.M., C.K.T. analysed Iso-Seq data; D.M.B. and G.A.R. analysed

937 sequence variants; B.A., K.B., C.G.G., T.H., O.I., F.J.M. annotated the assembled genome sequences;  
938 A.W. and A.L.A drafted the manuscript; all authors read and approved the final manuscript.

939

940 **Competing interests**

941 The authors declare that they have no competing interests.

942

943 **Data and materials availability**

944 The genome assemblies are deposited at NCBI under accession numbers GCA\_000003025  
945 (Scrofa11.1) and GCA\_002844635.1 (USMARCv1.0). The associated BioSample accession numbers are  
946 SAMN02953785 and SAMN07325927, respectively. Iso-seq and RNA-Seq data used for analysis and  
947 annotation are available under accession numbers PRJNA351265 and PRJEB19386, respectively.

948

949

950 **Figure 1. Assemblies and radiation hybrid map alignments.** Plots illustrating co-linearity between radiation hybrid map and a) Sscrofa11.1 and b) USMARCv1.0  
951 assemblies (autosomes only).

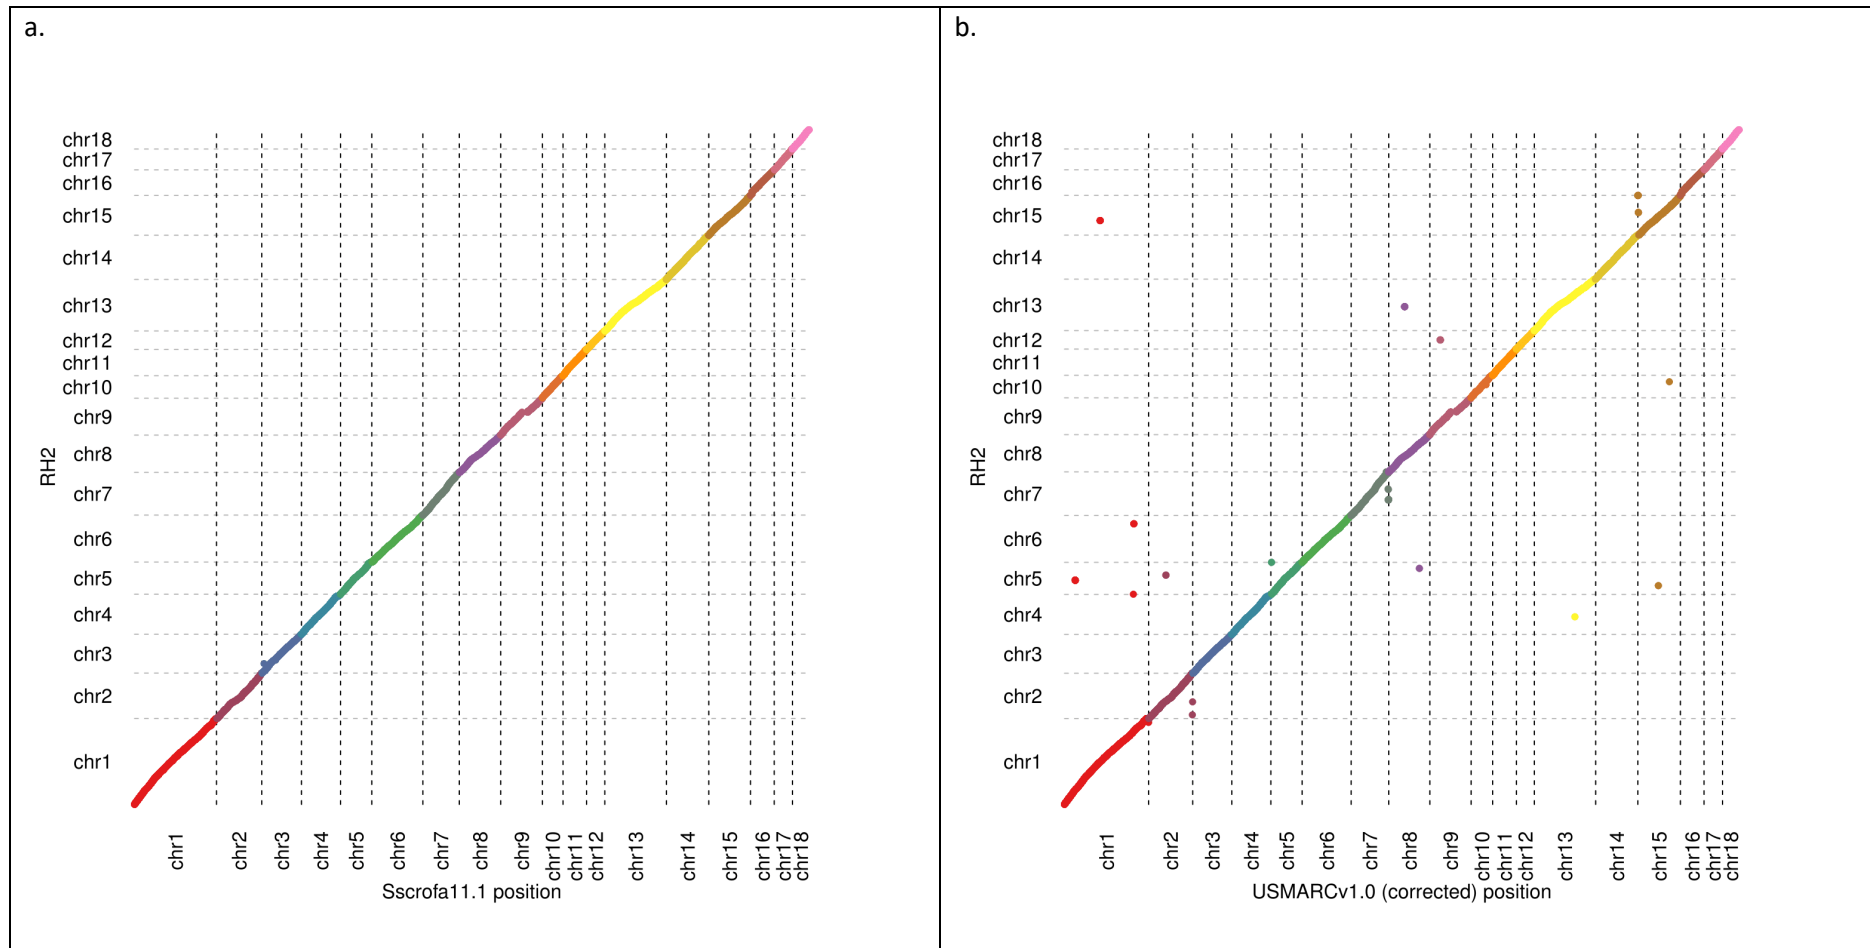

952

953 **Figure 2. Visualisation of improvements in assembly contiguity.** Graphical visualisation of contigs  
954 for Sscrofa11 (top) and Sscrofa10.2 (bottom) as alternating dark and light grey bars.

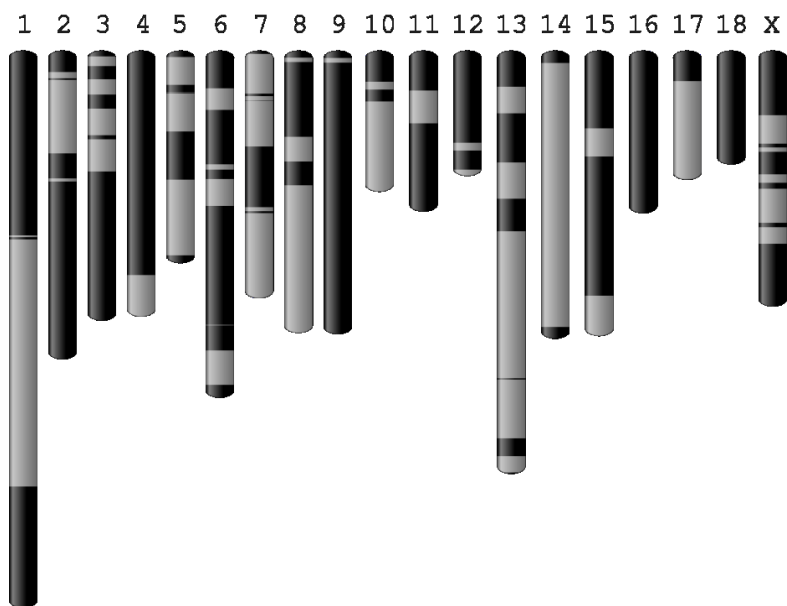

955

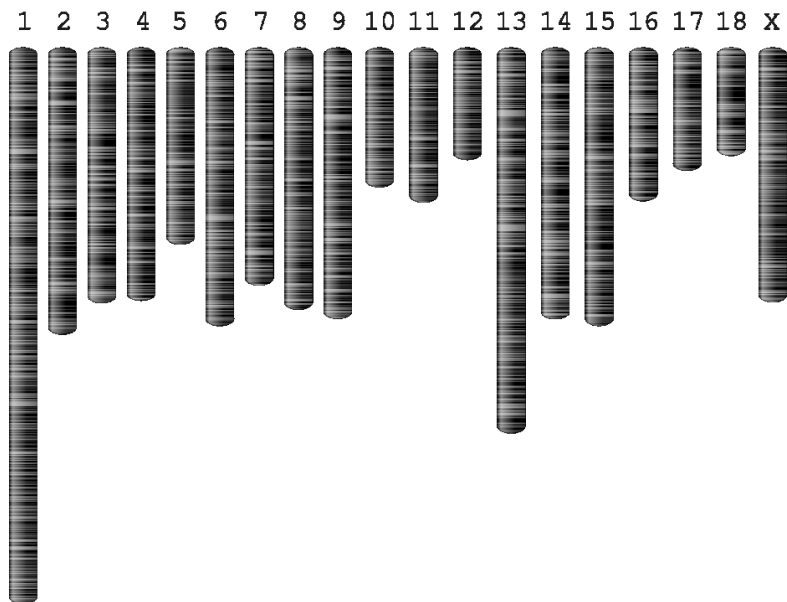

956

957

958



959 **Table 1. Assembly statistics.** Summary statistics for assembled pig genome sequences and comparison with current human reference genome. (source: NCBI,

960 <https://www.ncbi.nlm.nih.gov/assembly/>; \* includes mitochondrial genome.

| Assembly                     | Sscrofa10.2   | Sscrofa11     | Sscrofa11.1   | USMARCv1.0    | GRCh38.p12    |
|------------------------------|---------------|---------------|---------------|---------------|---------------|
| Total sequence length        | 2,808,525,991 | 2,456,768,445 | 2,501,912,388 | 2,755,438,182 | 3,099,706,404 |
| Total ungapped length        | 2,519,152,092 | 2,454,899,091 | 2,472,047,747 | 2,623,130,238 | 2,948,583,725 |
| Number of scaffolds          | 9,906         | 626           | 706           | 14,157        | 472           |
| Gaps between scaffolds       | 5,323         | 24            | 93            | 0             | 349           |
| Number of unplaced scaffolds | 4,562         | 583           | 583           | 14,136        | 126           |
| Scaffold N50                 | 576,008       | 88,231,837    | 88,231,837    | 131,458,098   | 67,794,873    |
| Scaffold L50                 | 1,303         | 9             | 9             | 9             | 16            |
| Number of unspanned gaps     | 5,323         | 24            | 93            | 0             | 349           |
| Number of spanned gaps       | 233,116       | 79            | 413           | 661           | 526           |
| Number of contigs            | 243,021       | 705           | 1,118         | 14,818        | 998           |
| Contig N50                   | 69,503        | 48,231,277    | 48,231,277    | 6,372,407     | 57,879,411    |
| Contig L50                   | 8,632         | 15            | 15            | 104           | 18            |
| Number of chromosomes*       | *21           | 19            | *21           | *21           | 24            |

961

962

963 **Table 2. Summary of quality statistics for SSC1-18, SSCX.** Quality measures and terms as defined [14].

964

|                                                         | Mean<br>(Sscrofa11) | Std<br>(Sscrofa11) | Bases<br>(Sscrofa11) | % genome<br>(Sscrofa11) | % genome<br>(Sscrofa10.2) |
|---------------------------------------------------------|---------------------|--------------------|----------------------|-------------------------|---------------------------|
| High Coverage                                           | 50                  | 7                  | 119,341,205          | 4.9                     | 2.6                       |
| Low Coverage (LC)                                       | 50                  | 7                  | 185,385,536          | 7.5                     | 26.6                      |
| % Properly paired                                       | 86                  | 6.8                | 95,508,007           | 3.9                     | 4.95                      |
| % High inserts                                          | 0.3                 | 1.6                | 40,835,320           | 1.72                    | 1.52                      |
| % Low inserts                                           | 8.2                 | 4.3                | 114,793,298          | 4.7                     | 3.99                      |
| Low quality (LQ)                                        | -                   | -                  | 284,838,040          | 11.6                    | 13.85                     |
| Total LQLC                                              | -                   | -                  | 399,927,747          | 16.3                    | 33.07                     |
| LQLC windows that do not intersect RepeatMasker regions |                     |                    | 39,918,551           | 1.6                     |                           |

965

966

967 **Table 3. Annotation statistics.** Ensembl annotation of pig (Sscrofa10.2, Sscrofa11.1, USMARCv1.0), human (GRCh38.p12) and mouse (GRCm38.p6)  
 968 assemblies.

969

|                          | Sscrofa10.2                       | Sscrofa11.1          | USMARCv1.0           | GRCh38.p13                      | GRCm38.p6                       |
|--------------------------|-----------------------------------|----------------------|----------------------|---------------------------------|---------------------------------|
|                          | Ensembl (Release 89)              | Ensembl (Release 98) | Ensembl (Release 97) | Ensembl (Release 98)            | Ensembl (Release 98)            |
| Coding genes             | 21,630<br>(Incl. 10 read through) | 21,301               | 21,535               | 20,444<br>incl 667 read through | 22,508<br>incl 270 read through |
| Non-coding genes         | 3,124                             | 8,971                | 6,113                | 23,949                          | 16,078                          |
| small non-coding genes   | 2,804                             | 2,156                | 2,427                | 4,871                           | 5,531                           |
| long non-coding genes    | 135<br>(incl 1 read through)      | 6,798                | 3,307                | 16,857<br>incl 304 read through | 9,985<br>incl 75 read through   |
| misc. non-coding genes   | 185                               | 17                   | 379                  | 2,221                           | 562                             |
| Pseudogenes              | 568                               | 1,626                | 674                  | 15,214<br>incl 8 read through   | 13,597<br>incl 4 read through   |
| Gene transcripts         | 30,585                            | 63,041               | 58,692               | 227,530                         | 142,446                         |
|                          |                                   |                      |                      |                                 |                                 |
| Genscan gene predictions | 52,372                            | 46,573               | 152,168              | 51,756                          | 57,381                          |
| Short variants           | 60,389,665                        | 64,310,125           |                      | 665,834,144                     | 83,761,978                      |
| Structural variants      | 224,038                           | 224,038              |                      | 6,013,113                       | 791,878                         |

970

971

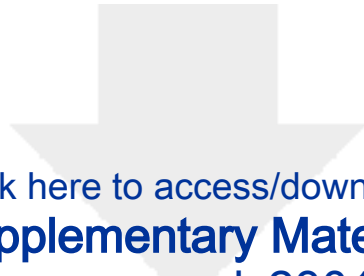

Click here to access/download  
**Supplementary Material**  
Pig\_genomes\_suppl\_23012019.pdf

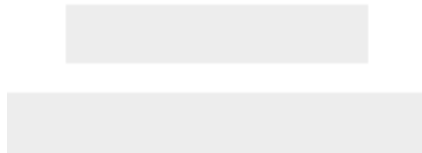

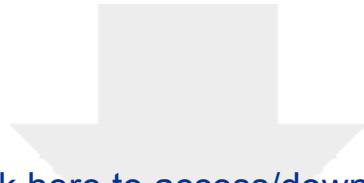

[Click here to access/download](#)

**Supplementary Material**

[TableS10\\_Pig\\_strains\\_annotate.xlsx](#)

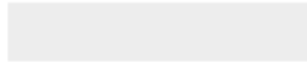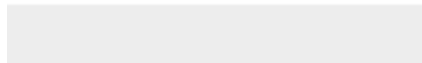

Supplement: giaa051_giga-d-19-00374_original_submission.pdf [file giaa051_giga-d-19-00374_original_submission.pdf]
