# Supplementary material for: An improved pig reference genome sequence to enable pig genetics and genomics research
Source: PubMed Central journal article supplement (PMC7448572; doi:10.1093/gigascience/giaa051), 2020-06-16
Supplement: giaa051_giga-d-19-00374_revision_2.pdf [file giaa051_giga-d-19-00374_revision_2.pdf]

# GigaScience

## An improved pig reference genome sequence to enable pig genetics and genomics research

--Manuscript Draft--

|                                                    |                                                                                                                                                                                                                                                                                                                                                                                                                                                                                                                                                                                                                                                                                                                                                                                                                                                                                                                                                                                                                                                                                                                                                                                                       |                                            |
|----------------------------------------------------|-------------------------------------------------------------------------------------------------------------------------------------------------------------------------------------------------------------------------------------------------------------------------------------------------------------------------------------------------------------------------------------------------------------------------------------------------------------------------------------------------------------------------------------------------------------------------------------------------------------------------------------------------------------------------------------------------------------------------------------------------------------------------------------------------------------------------------------------------------------------------------------------------------------------------------------------------------------------------------------------------------------------------------------------------------------------------------------------------------------------------------------------------------------------------------------------------------|--------------------------------------------|
| <b>Manuscript Number:</b>                          | GIGA-D-19-00374R2                                                                                                                                                                                                                                                                                                                                                                                                                                                                                                                                                                                                                                                                                                                                                                                                                                                                                                                                                                                                                                                                                                                                                                                     |                                            |
| <b>Full Title:</b>                                 | An improved pig reference genome sequence to enable pig genetics and genomics research                                                                                                                                                                                                                                                                                                                                                                                                                                                                                                                                                                                                                                                                                                                                                                                                                                                                                                                                                                                                                                                                                                                |                                            |
| <b>Article Type:</b>                               | Research                                                                                                                                                                                                                                                                                                                                                                                                                                                                                                                                                                                                                                                                                                                                                                                                                                                                                                                                                                                                                                                                                                                                                                                              |                                            |
| <b>Funding Information:</b>                        | Biotechnology and Biological Sciences Research Council (BBS/E/D/20211550)                                                                                                                                                                                                                                                                                                                                                                                                                                                                                                                                                                                                                                                                                                                                                                                                                                                                                                                                                                                                                                                                                                                             | Prof Alan Archibald                        |
|                                                    | Biotechnology and Biological Sciences Research Council (BBS/E/D/10002070)                                                                                                                                                                                                                                                                                                                                                                                                                                                                                                                                                                                                                                                                                                                                                                                                                                                                                                                                                                                                                                                                                                                             | Prof Alan Archibald                        |
|                                                    | Biotechnology and Biological Sciences Research Council (BB/F021372/1)                                                                                                                                                                                                                                                                                                                                                                                                                                                                                                                                                                                                                                                                                                                                                                                                                                                                                                                                                                                                                                                                                                                                 | Prof Nabeel Affara                         |
|                                                    | Biotechnology and Biological Sciences Research Council (BB/M011461/1)                                                                                                                                                                                                                                                                                                                                                                                                                                                                                                                                                                                                                                                                                                                                                                                                                                                                                                                                                                                                                                                                                                                                 | Prof Alan Archibald                        |
|                                                    | Biotechnology and Biological Sciences Research Council (BB/M011615/1)                                                                                                                                                                                                                                                                                                                                                                                                                                                                                                                                                                                                                                                                                                                                                                                                                                                                                                                                                                                                                                                                                                                                 | Dr Paul Flicek                             |
|                                                    | Biotechnology and Biological Sciences Research Council (BB/M01844X/1)                                                                                                                                                                                                                                                                                                                                                                                                                                                                                                                                                                                                                                                                                                                                                                                                                                                                                                                                                                                                                                                                                                                                 | Prof Alan Archibald                        |
|                                                    | Seventh Framework Programme (KBBE222664)                                                                                                                                                                                                                                                                                                                                                                                                                                                                                                                                                                                                                                                                                                                                                                                                                                                                                                                                                                                                                                                                                                                                                              | Not applicable                             |
|                                                    | Wellcome Trust (WT108749/Z/15/Z)                                                                                                                                                                                                                                                                                                                                                                                                                                                                                                                                                                                                                                                                                                                                                                                                                                                                                                                                                                                                                                                                                                                                                                      | Dr Paul Flicek                             |
|                                                    | U.S. Department of Agriculture (8042-31000-001-00-D)                                                                                                                                                                                                                                                                                                                                                                                                                                                                                                                                                                                                                                                                                                                                                                                                                                                                                                                                                                                                                                                                                                                                                  | Dr Derek M Bickhart<br>Dr Benjamin D Rosen |
|                                                    | U.S. Department of Agriculture (5090-31000-026-00-D)                                                                                                                                                                                                                                                                                                                                                                                                                                                                                                                                                                                                                                                                                                                                                                                                                                                                                                                                                                                                                                                                                                                                                  | Dr Derek M Bickhart                        |
|                                                    | U.S. Department of Agriculture (3040-31000-100-00-D)                                                                                                                                                                                                                                                                                                                                                                                                                                                                                                                                                                                                                                                                                                                                                                                                                                                                                                                                                                                                                                                                                                                                                  | Dr Timothy P.L. Smith                      |
| <b>Abstract:</b>                                   | <p>The domestic pig (<i>Sus scrofa</i>) is important both as a food source and as a biomedical model given its similarity in size, anatomy, physiology, metabolism, pathology and pharmacology to humans. The draft reference genome (Sscrofa10.2) of a purebred Duroc female pig established using older clone-based sequencing methods was incomplete and unresolved redundancies, short range order and orientation errors and associated misassembled genes limited its utility. We present two annotated highly contiguous chromosome-level genome assemblies created with more recent long read technologies and a whole genome shotgun strategy, one for the same Duroc female (Sscrofa11.1) and one for an outbred, composite breed male (USMARCv1.0). Both assemblies are of substantially higher (&gt;90-fold) continuity and accuracy than Sscrofa10.2. These highly contiguous assemblies plus annotation of a further 11 short read assemblies provide an unprecedented view of the genetic make-up of this important agricultural and biomedical model species. We propose that the improved Duroc assembly (Sscrofa11.1) become the reference genome for genomic research in pigs.</p> |                                            |
| <b>Corresponding Author:</b>                       | Alan Archibald<br><br>UNITED KINGDOM                                                                                                                                                                                                                                                                                                                                                                                                                                                                                                                                                                                                                                                                                                                                                                                                                                                                                                                                                                                                                                                                                                                                                                  |                                            |
| <b>Corresponding Author Secondary Information:</b> |                                                                                                                                                                                                                                                                                                                                                                                                                                                                                                                                                                                                                                                                                                                                                                                                                                                                                                                                                                                                                                                                                                                                                                                                       |                                            |
| <b>Corresponding Author's Institution:</b>         |                                                                                                                                                                                                                                                                                                                                                                                                                                                                                                                                                                                                                                                                                                                                                                                                                                                                                                                                                                                                                                                                                                                                                                                                       |                                            |

|                                                      |                     |
|------------------------------------------------------|---------------------|
| <b>Corresponding Author's Secondary Institution:</b> |                     |
| <b>First Author:</b>                                 | Amanda Warr         |
| <b>First Author Secondary Information:</b>           |                     |
| <b>Order of Authors:</b>                             | Amanda Warr         |
|                                                      | Nabeel Affara       |
|                                                      | Bronwen Aken        |
|                                                      | Hamid Beiki         |
|                                                      | Derek M Bickhart    |
|                                                      | Konstantinos Billis |
|                                                      | William Chow        |
|                                                      | Lel Eory            |
|                                                      | Heather A Finlayson |
|                                                      | Paul Flicek         |
|                                                      | Carlos G Girón      |
|                                                      | Darren K Griffin    |
|                                                      | Richard Hall        |
|                                                      | Greg Hannum         |
|                                                      | Thibaut Hourlier    |
|                                                      | Kerstin Howe        |
|                                                      | David Hume          |
|                                                      | Osagie Izuogu       |
|                                                      | Kristi Kim          |
|                                                      | Sergey Koren        |
|                                                      | Haibou Liu          |
|                                                      | Nancy Manchanda     |
|                                                      | Fergal J Martin     |
|                                                      | Dan J Nonneman      |
|                                                      | Rebecca E O'Connor  |
|                                                      | Adam M Phillippy    |
|                                                      | Gary A Rohrer       |
|                                                      | Benjamin D Rosen    |
|                                                      | Laurie A Rund       |
|                                                      | Carole A Sargent    |
|                                                      | Lawrence B Schook   |
|                                                      | Steven G Schroeder  |
|                                                      | Ariel S Schwartz    |
|                                                      | Ben M Skinner       |
|                                                      | Richard Talbot      |
|                                                      | Elizabeth Tseng     |
|                                                      |                     |

|                                                |                                                                                                                                                                                                                                                                                                                                                                                                                                                                                                                                                                                                                                                                                                                                                                                                                                                                                                                                                                                                                                                                                                                                                                                                                                                                                                                                                                                                                                                                                                                                                                                                                                                                                                                                                                                                                                                                                                                                                                                                                                                                                                                                                                                                                                                                                                                                                                                                                                                                                                                                                                                                                                                                                                                                                                                                                                                                                                                                                                                                                                                                                                                                                                                                                                                                                                                                                                                                                                                                                                                                                                                                                                                                                                                                                                                                                                                                                                                                                                                                                                                                                |
|------------------------------------------------|--------------------------------------------------------------------------------------------------------------------------------------------------------------------------------------------------------------------------------------------------------------------------------------------------------------------------------------------------------------------------------------------------------------------------------------------------------------------------------------------------------------------------------------------------------------------------------------------------------------------------------------------------------------------------------------------------------------------------------------------------------------------------------------------------------------------------------------------------------------------------------------------------------------------------------------------------------------------------------------------------------------------------------------------------------------------------------------------------------------------------------------------------------------------------------------------------------------------------------------------------------------------------------------------------------------------------------------------------------------------------------------------------------------------------------------------------------------------------------------------------------------------------------------------------------------------------------------------------------------------------------------------------------------------------------------------------------------------------------------------------------------------------------------------------------------------------------------------------------------------------------------------------------------------------------------------------------------------------------------------------------------------------------------------------------------------------------------------------------------------------------------------------------------------------------------------------------------------------------------------------------------------------------------------------------------------------------------------------------------------------------------------------------------------------------------------------------------------------------------------------------------------------------------------------------------------------------------------------------------------------------------------------------------------------------------------------------------------------------------------------------------------------------------------------------------------------------------------------------------------------------------------------------------------------------------------------------------------------------------------------------------------------------------------------------------------------------------------------------------------------------------------------------------------------------------------------------------------------------------------------------------------------------------------------------------------------------------------------------------------------------------------------------------------------------------------------------------------------------------------------------------------------------------------------------------------------------------------------------------------------------------------------------------------------------------------------------------------------------------------------------------------------------------------------------------------------------------------------------------------------------------------------------------------------------------------------------------------------------------------------------------------------------------------------------------------------------|
|                                                | Christopher K Tuggle                                                                                                                                                                                                                                                                                                                                                                                                                                                                                                                                                                                                                                                                                                                                                                                                                                                                                                                                                                                                                                                                                                                                                                                                                                                                                                                                                                                                                                                                                                                                                                                                                                                                                                                                                                                                                                                                                                                                                                                                                                                                                                                                                                                                                                                                                                                                                                                                                                                                                                                                                                                                                                                                                                                                                                                                                                                                                                                                                                                                                                                                                                                                                                                                                                                                                                                                                                                                                                                                                                                                                                                                                                                                                                                                                                                                                                                                                                                                                                                                                                                           |
|                                                | Mick Watson                                                                                                                                                                                                                                                                                                                                                                                                                                                                                                                                                                                                                                                                                                                                                                                                                                                                                                                                                                                                                                                                                                                                                                                                                                                                                                                                                                                                                                                                                                                                                                                                                                                                                                                                                                                                                                                                                                                                                                                                                                                                                                                                                                                                                                                                                                                                                                                                                                                                                                                                                                                                                                                                                                                                                                                                                                                                                                                                                                                                                                                                                                                                                                                                                                                                                                                                                                                                                                                                                                                                                                                                                                                                                                                                                                                                                                                                                                                                                                                                                                                                    |
|                                                | Timothy P.L. Smith                                                                                                                                                                                                                                                                                                                                                                                                                                                                                                                                                                                                                                                                                                                                                                                                                                                                                                                                                                                                                                                                                                                                                                                                                                                                                                                                                                                                                                                                                                                                                                                                                                                                                                                                                                                                                                                                                                                                                                                                                                                                                                                                                                                                                                                                                                                                                                                                                                                                                                                                                                                                                                                                                                                                                                                                                                                                                                                                                                                                                                                                                                                                                                                                                                                                                                                                                                                                                                                                                                                                                                                                                                                                                                                                                                                                                                                                                                                                                                                                                                                             |
|                                                | Alan Archibald                                                                                                                                                                                                                                                                                                                                                                                                                                                                                                                                                                                                                                                                                                                                                                                                                                                                                                                                                                                                                                                                                                                                                                                                                                                                                                                                                                                                                                                                                                                                                                                                                                                                                                                                                                                                                                                                                                                                                                                                                                                                                                                                                                                                                                                                                                                                                                                                                                                                                                                                                                                                                                                                                                                                                                                                                                                                                                                                                                                                                                                                                                                                                                                                                                                                                                                                                                                                                                                                                                                                                                                                                                                                                                                                                                                                                                                                                                                                                                                                                                                                 |
| <b>Order of Authors Secondary Information:</b> |                                                                                                                                                                                                                                                                                                                                                                                                                                                                                                                                                                                                                                                                                                                                                                                                                                                                                                                                                                                                                                                                                                                                                                                                                                                                                                                                                                                                                                                                                                                                                                                                                                                                                                                                                                                                                                                                                                                                                                                                                                                                                                                                                                                                                                                                                                                                                                                                                                                                                                                                                                                                                                                                                                                                                                                                                                                                                                                                                                                                                                                                                                                                                                                                                                                                                                                                                                                                                                                                                                                                                                                                                                                                                                                                                                                                                                                                                                                                                                                                                                                                                |
| <b>Response to Reviewers:</b>                  | <p>Reviewer reports:<br/> Reviewer #1:<br/> Mingzhou Li (Reviewer 1): The domestic pig is of enormous agricultural significance and valuable models for many human diseases. Nonetheless, the draft assembly of the reference pig genome (Sscrofa10.2) was incomplete (at least 8% of the sequence is estimated to be missing from the assembly) and limited its utility. The MS entitled "An improved pig reference genome sequence to enable pig genetics and genomics research" reported two annotated highly contiguous chromosome-level genome assemblies (i.e., Sscrofa11.1 and USMARCv1.0) and also presented annotation of a further 11 short read assemblies of representative pig breeds in Europe and Asia. Especially, the updated Sscrofa11.1 (Contig N50 = 48.23 Mb, scaffold N50 = 88.23 Mb,) is substantively superior than the former version of Sscrofa10.2 (Contig N50 = 69.50 Kb, scaffold N50 = 576.01 Kb). To the best of my knowledge, this high-quality assembly of the reference pig genome (Sscrofa11.1, released at Dec 2016) had been widely adapted by the pig genomics community.</p> <p>I appreciate authors' significant efforts for the pig genomics community, which provide an unprecedented view of the genetic make-up of this important agricultural and biomedical model species. The quality of the presentation is excellent, the structure of the presentation is clear and there are a very small number of typographical errors. Overall the discussions and conclusions appear sound and objective.</p> <p>Specific comments:<br/> 1) Lines 50-51 "The domestic pig (<i>Sus scrofa</i>) is important both as a food source and as a biomedical model with high anatomical and immunological similarity to humans". It is well documented that, compared with rodent, pig is closely comparable to human in size, anatomy, physiology, metabolism, pathology and pharmacology. Why only highlight "immunological similarity" here? As well as in Line 72: "including responses to infectious diseases".<br/> 2) Line 123 "MARC1423004 which was a Duroc/Landrace/Yorkshire crossbred barrow (i.e. castrated male pig)". Is it means the terminal crossbreeding system with three pig breeds, i.e., Duroc × (Landrace × Yorkshire) (DLY). I think the author should provide the accurate description.<br/> 3) Lines 220-221 "After correcting the orientation of these inverted scaffolds, there is good agreement between the USMARCv1.0 assembly and the RH map (Fig. 1b)." I suggest the author should provide the exact statistic number to support the statement of "good agreement".<br/> 4 ) Lines 286-287: "There were five genes that were present in the Iso-Seq data, but missing in the Sscrofa11.1 assembly.". I have not find the corresponding description of the method and the more detail results of the "identification of missing genes in the assembly". I think the author should provide these essential information. Given the volume of information available, it is difficult to assess the methodology.<br/> 5) Lines 548-549: "haplotype resolved assemblies of a Meishan and White Composite F1 crossbred pig currently being sequenced." Same as my comment 2), the author should accurately provide description of the sample.</p> <p>Responses<br/> Specific comments:<br/> 1) Lines 50-51 "The domestic pig (<i>Sus scrofa</i>) is important both as a food source and as a biomedical model with high anatomical and immunological similarity to humans". It is well documented that, compared with rodent, pig is closely comparable to human in size, anatomy, physiology, metabolism, pathology and pharmacology. Why only highlight "immunological similarity" here? As well as in Line 72: "including responses to infectious diseases".<br/> We have changed this opening line of the abstract to:<br/> "The domestic pig (<i>Sus scrofa</i>) is important both as a food source and as a biomedical model given its similarity in size, anatomy, physiology, metabolism, pathology and</p> |

pharmacology to humans." (lines 50-51)

We have changed this text in original lines 69-72 to:

In farmed animal species such as the domestic pig (*Sus scrofa*) genome sequences have been integral to the discovery of molecular genetic variants and the development of single nucleotide polymorphism (SNP) chips [1] and enabled efforts to dissect the genetic control of complex traits, such as growth, feed conversion, body composition, reproduction, behaviour and responses to infectious diseases [2]. (lines 69-73).

2) Line 123 "MARC1423004 which was a Duroc/Landrace/Yorkshire crossbred barrow (i.e. castrated male pig)". Is it means the terminal crossbreeding system with three pig breeds, i.e., Duroc × (Landrace × Yorkshire) (DLY). I think the author should provide the accurate description.

This statement has been replaced with the following : " MARC1423004 which was a crossbred barrow (i.e. castrated male pig) from a composite population (approximately ½ Landrace, ¼ Duroc and ¼ Yorkshire) at the USDA Meat Animal Research Center." (lines 124-125)

3) Lines 220-221 "After correcting the orientation of these inverted scaffolds, there is good agreement between the USMARCv1.0 assembly and the RH map (Fig. 1b)." I suggest the author should provide the exact statistic number to support the statement of "good agreement".

While the plots demonstrate visually good overall agreement between the RH maps and the assemblies, we have provided statistics showing the finer scale agreement (new Supplementary Table S5). We show the proportion of SNPs whose neighbours are adjacent in both the genome alignment and the RH map.

The additional table is cited in the text as follows:

"After correcting the orientation of these inverted scaffolds, there is good agreement between the USMARCv1.0 assembly and the RH map [9] (Fig. 1b, Table S5)." (lines 224-225).

4 ) Lines 286-287: "There were five genes that were present in the Iso-Seq data, but missing in the Sscrofa11.1 assembly.". I have not find the corresponding description of the method and the more detail results of the "identification of missing genes in the assembly" . I think the author should provide these essential information. Given the volume of information available, it is difficult to assess the methodology.

The 'missing genes' were identified by the Cogent analysis as clearly described in the manuscript in the section headed "Completeness of the assemblies" (lines 268- 295).

Each of the missing genes were supported by multiple lines of evidence: (1) there were two or more full-length transcript isoforms, often from multiple tissues, from the PacBio Iso-Seq data; (2) the Iso-Seq transcripts had a BLAST hit to other species that were used to identify the missing gene name as stated in lines 290-295

5) Lines 548-549: "haplotype resolved assemblies of a Meishan and White Composite F1 crossbred pig currently being sequenced." Same as my comment 2), the author should accurately provide description of the sample.

This pig is an F1 between a Meishan and a pig from the USDA MARC composite line (approximately ½ Landrace, ¼ Duroc and ¼ Yorkshire) as for MARC1423004. The text has been modified as follows:

(ii) haplotype resolved assemblies of a Meishan and White Composite F1 crossbred pig (i.e. the offspring of a Meishan sire and a White Composite dam that is approximately ½ Landrace, ¼ Duroc and ¼ Yorkshire) currently being sequenced. (lines 552-554)

Reviewer #2: The authors present us with two high-quality genome assemblies for the pig. In addition to the regular assembly procedure to obtain the two assemblies, they have made great efforts to check the accuracies of both using lots of other datasets, including FISH, radiation hybrid map, BAC clones. I only have several minor concerns as follows:

The authors annotated both the genomes using full-length transcriptome data from a single individual. I wonder whether you have any specific filtering step to avoid incorrect annotations, as the differential expression (both expression level and alternative splicing) may contribute to their phenotypic variances.

Line 180 - 190, the authors may want to explain more on the definition of low quality and low coverage regions, e.g. What're your criteria? Besides, please provide statistics of GC content for those remaining LQLC regions to show your points of view better. For the assembly of USMARC, the authors mentioned that " The resulting assemblies were compared and the Celera Assembler result was selected based on better agreement with a Dovetail Chicago® library," it is better to explain more on your

definition for the "better agreement".

Line 235 - 245, identify heterozygous structure variances using long reads can check whether the incongruencies between the v11.1 and v10.2 derived from innate differences between two haploids.

#### Responses

The authors annotated both the genomes using full-length transcriptome data from a single individual. I wonder whether you have any specific filtering step to avoid incorrect annotations, as the differential expression (both expression level and alternative splicing) may contribute to their phenotypic variances.

Whilst long read transcriptome data from one individual (i.e. MARC1423004 that was the source of DNA for the USMARCv1.0 assembly) was used to annotate the assemblies, short read RNA-seq data from this pig and four Duroc pigs (PRJEB19386, Duroc 21, Duroc 22, Duroc 23 & Duroc 24; see Table S9) was also used by the Ensembl Genebuild team. The NCBI annotation used further short read RNA-Seq data. The Ensembl annotation pipeline, including the filtering steps, is described in the Supplementary materials. There is good agreement between the Ensembl and NCBI annotation. Thus, we are confident that incorrect annotations have been minimised. Significantly more alternative transcripts have been captured in the annotation of the new assemblies. As noted in the manuscript information on expression levels for the Duroc pigs can be accessed through links from Ensembl genes to the EBI Gene Expression Database.

Line 180 - 190, the authors may want to explain more on the definition of low quality and low coverage regions, e.g. What're your criteria? Besides, please provide statistics of GC content for those remaining LQLC regions to show your points of view better.

The low coverage and low quality regions are as described in

<https://doi.org/10.3389/fgene.2015.00338>. Briefly, Illumina data was mapped to the assembly, filtered to remove multimappers and the coverage over 1000bp windows was calculated. The coverage for each window was normalised for GC content.

Regions deemed LQ were windows that had coverage more than 2 std above the median after normalisation for GC content, where the count of reads that were not properly paired was 2 std above the mean, or the number of reads with unexpectedly large/small insert sizes was 2 std above the mean. The LC regions were windows that had coverage more than 2 std below the median after normalisation for GC content. The LC regions are given separately because they are more likely to include, for example, repetitive regions where multimappers are more likely to have been, or regions of extreme GC content which had such low coverage to begin with that the normalisation was insufficient to correct this. We therefore have more confidence in the LQ regions representing true misassemblies/structural variation than the LC regions although the drop in LC regions from 10.2 to 11.1 does suggest that for the former assembly many of these were true misassemblies. This description has not been included in the manuscript as it is described fully in the cited paper, however a brief explanation has been added as to what these categories include to make this clearer without having to read the other manuscript (line 182).

The average GC content of the regions was calculated at 61.6%, which indeed supports our suggestion that the remaining regions may relate more to biases in the sequencing technology than actual error, and this has been added to the text on line 189.

#### Change line 182-183

From: "Alignments of Illumina sequence reads from the same female pig were used to identify regions of low quality (LQ) or low coverage (LC) (Table 2)."

To: "Alignments of Illumina sequence reads from the same female pig were used to identify regions of low quality (LQ; regions with high GC normalised coverage, prevalence of improperly paired reads and prevalence of reads with improper insert sizes) or low coverage (LC; regions with low GC normalised coverage) (Table 2)."

#### Change old line 187:

From "The remaining LQLC segments of Sscrofa11 may represent regions where short read coverage is low due to known systematic errors of the short read platform related to GC content, rather than deficiencies of the assembly."

To "The remaining LQLC segments of Sscrofa11 have an average GC content of 61.6%. Thus, these regions may represent sequence where short read coverage is low

|                                                                                                                                                                                                                                                                                                                                                                                                                                    |                                                                                                                                                                                                                                                                                                                                                                                                                                                                                                                                                                                                                                                                                                                                                                                                                                                                                                                                                                                                                                                                                                                                                                                                                                                                                                                                                                                                                                                                                                                                                                                                                                                                                                                                                                                                                                                                                                                                                                                                                                                                                                                                                                                                                                                                                                                                                                                                                                                                                                                                                                    |
|------------------------------------------------------------------------------------------------------------------------------------------------------------------------------------------------------------------------------------------------------------------------------------------------------------------------------------------------------------------------------------------------------------------------------------|--------------------------------------------------------------------------------------------------------------------------------------------------------------------------------------------------------------------------------------------------------------------------------------------------------------------------------------------------------------------------------------------------------------------------------------------------------------------------------------------------------------------------------------------------------------------------------------------------------------------------------------------------------------------------------------------------------------------------------------------------------------------------------------------------------------------------------------------------------------------------------------------------------------------------------------------------------------------------------------------------------------------------------------------------------------------------------------------------------------------------------------------------------------------------------------------------------------------------------------------------------------------------------------------------------------------------------------------------------------------------------------------------------------------------------------------------------------------------------------------------------------------------------------------------------------------------------------------------------------------------------------------------------------------------------------------------------------------------------------------------------------------------------------------------------------------------------------------------------------------------------------------------------------------------------------------------------------------------------------------------------------------------------------------------------------------------------------------------------------------------------------------------------------------------------------------------------------------------------------------------------------------------------------------------------------------------------------------------------------------------------------------------------------------------------------------------------------------------------------------------------------------------------------------------------------------|
|                                                                                                                                                                                                                                                                                                                                                                                                                                    | <p>due to the known systematic bias of the short read platform against extreme GC content sequences, rather than deficiencies of the assembly."</p> <p>For the assembly of USMARC, the authors mentioned that " The resulting assemblies were compared and the Celera Assembler result was selected based on better agreement with a Dovetail Chicago® library," it is better to explain more on your definition for the "better agreement".</p> <p>The resulting assemblies were compared and the Celera Assembler result was selected based on a lower proportion of conflicting links between read pairs of a Dovetail Chicago library, with fewer suggested breaks in the contigs. The relevant sentence has now been modified.</p> <p>Line 235 - 245, identify heterozygous structure variances using long reads can check whether the incongruencies between the v11.1 and v10.2 derived from innate differences between two haploids.</p> <p>The very significant reductions in low quality and low coverage regions from Sscrofa10.2 to Sscrofa11.1 (see earlier comment) confirms that Sscrofa11.1 is a significantly better representation of the genome sequence of Duroc sow 2-14. The Sscrofa10.2 assembly was generated from sequences of individual BAC clones and for the region covered by any individual BAC clone captures only one of the two haplotypes for the region. The Sscrofa11.1 assembly was assembled from whole genome shotgun sequence data and switches between haplotypes are more difficult to detect. Thus, any analysis of the haplotypes captured in these two assemblies would be compromised by the differences in sequencing strategy and in quality between the two assemblies.</p> <p>We have clarified the text to read:<br/> "Both Sscrofa11.1 and USMARCv1.0 assemblies have more differences against Sscrofa10.2 (33,347 and 44,023 respectively) than against each other (28,733). This is despite the fact that Sscrofa11.1 and Sscrofa10.2 represent the same pig genome. While some differences between Sscrofa10.2 and Sscrofa11.1 may be due to differences in which haplotype has been captured in the assembly, the reduction in low quality and low coverage regions and the dramatic decrease in differences versus USMARCv1.0 leads us to conclude that the majority are improvements in the assembly of Sscrofa11.1. The differences between the Sscrofa11.1 and USMARCv1.0 will represent a mix of true structural differences and assembly errors that will require further research to resolve."</p> |
| <b>Additional Information:</b>                                                                                                                                                                                                                                                                                                                                                                                                     |                                                                                                                                                                                                                                                                                                                                                                                                                                                                                                                                                                                                                                                                                                                                                                                                                                                                                                                                                                                                                                                                                                                                                                                                                                                                                                                                                                                                                                                                                                                                                                                                                                                                                                                                                                                                                                                                                                                                                                                                                                                                                                                                                                                                                                                                                                                                                                                                                                                                                                                                                                    |
| <b>Question</b>                                                                                                                                                                                                                                                                                                                                                                                                                    | <b>Response</b>                                                                                                                                                                                                                                                                                                                                                                                                                                                                                                                                                                                                                                                                                                                                                                                                                                                                                                                                                                                                                                                                                                                                                                                                                                                                                                                                                                                                                                                                                                                                                                                                                                                                                                                                                                                                                                                                                                                                                                                                                                                                                                                                                                                                                                                                                                                                                                                                                                                                                                                                                    |
| Are you submitting this manuscript to a special series or article collection?                                                                                                                                                                                                                                                                                                                                                      | No                                                                                                                                                                                                                                                                                                                                                                                                                                                                                                                                                                                                                                                                                                                                                                                                                                                                                                                                                                                                                                                                                                                                                                                                                                                                                                                                                                                                                                                                                                                                                                                                                                                                                                                                                                                                                                                                                                                                                                                                                                                                                                                                                                                                                                                                                                                                                                                                                                                                                                                                                                 |
| <p><b>Experimental design and statistics</b></p> <p>Full details of the experimental design and statistical methods used should be given in the Methods section, as detailed in our <a href="#">Minimum Standards Reporting Checklist</a>. Information essential to interpreting the data presented should be made available in the figure legends.</p> <p>Have you included all the information requested in your manuscript?</p> | Yes                                                                                                                                                                                                                                                                                                                                                                                                                                                                                                                                                                                                                                                                                                                                                                                                                                                                                                                                                                                                                                                                                                                                                                                                                                                                                                                                                                                                                                                                                                                                                                                                                                                                                                                                                                                                                                                                                                                                                                                                                                                                                                                                                                                                                                                                                                                                                                                                                                                                                                                                                                |
| <b>Resources</b>                                                                                                                                                                                                                                                                                                                                                                                                                   | Yes                                                                                                                                                                                                                                                                                                                                                                                                                                                                                                                                                                                                                                                                                                                                                                                                                                                                                                                                                                                                                                                                                                                                                                                                                                                                                                                                                                                                                                                                                                                                                                                                                                                                                                                                                                                                                                                                                                                                                                                                                                                                                                                                                                                                                                                                                                                                                                                                                                                                                                                                                                |

|                                                                                                                                                                                                                                                                                                                                                                                                                                                                                                                                                         |            |
|---------------------------------------------------------------------------------------------------------------------------------------------------------------------------------------------------------------------------------------------------------------------------------------------------------------------------------------------------------------------------------------------------------------------------------------------------------------------------------------------------------------------------------------------------------|------------|
| <p>A description of all resources used, including antibodies, cell lines, animals and software tools, with enough information to allow them to be uniquely identified, should be included in the Methods section. Authors are strongly encouraged to cite <a href="#">Research Resource Identifiers</a> (RRIDs) for antibodies, model organisms and tools, where possible.</p> <p>Have you included the information requested as detailed in our <a href="#">Minimum Standards Reporting Checklist</a>?</p>                                             |            |
| <p><b>Availability of data and materials</b></p> <p>All datasets and code on which the conclusions of the paper rely must be either included in your submission or deposited in <a href="#">publicly available repositories</a> (where available and ethically appropriate), referencing such data using a unique identifier in the references and in the “Availability of Data and Materials” section of your manuscript.</p> <p>Have you have met the above requirement as detailed in our <a href="#">Minimum Standards Reporting Checklist</a>?</p> | <p>Yes</p> |



1 An improved pig reference genome sequence to enable pig genetics and genomics research

2

3 Amanda Warr<sup>1</sup> ([amanda.warr@roslin.ed.ac.uk](mailto:amanda.warr@roslin.ed.ac.uk)), Nabeel Affara<sup>2</sup> ([na106@cam.ac.uk](mailto:na106@cam.ac.uk)), Bronwen Aken<sup>3</sup>  
4 ([ba1@ebi.ac.uk](mailto:ba1@ebi.ac.uk)), Hamid Beiki<sup>4</sup> ([beiki.h.m@gmail.com](mailto:beiki.h.m@gmail.com)), Derek M. Bickhart<sup>5</sup> ([derek.bickart@usda.gov](mailto:derek.bickart@usda.gov)),  
5 Konstantinos Billis<sup>3</sup> ([kbillis@ebi.ac.uk](mailto:kbillis@ebi.ac.uk)), William Chow<sup>6</sup> ([wc2@ebi.ac.uk](mailto:wc2@ebi.ac.uk)), Lel Eory<sup>1</sup>  
6 ([lel.eory@roslin.ed.ac.uk](mailto:lel.eory@roslin.ed.ac.uk)), Heather A. Finlayson<sup>1</sup> ([heatherfinlayson@gmail.com](mailto:heatherfinlayson@gmail.com)), Paul Flicek<sup>3</sup>  
7 ([flicek@ebi.ac.uk](mailto:flicek@ebi.ac.uk)), Carlos G. Girón<sup>3</sup> ([carlos@ebi.ac.uk](mailto:carlos@ebi.ac.uk)), Darren K. Griffin<sup>7</sup> ([d.k.griffin@kent.ac.uk](mailto:d.k.griffin@kent.ac.uk)),  
8 Richard Hall<sup>8</sup> ([rhall@pacificbiosciences.com](mailto:rhall@pacificbiosciences.com)), Greg Hannum<sup>9</sup> ([greg@denovium.com](mailto:greg@denovium.com)), Thibaut  
9 Hourlier<sup>3</sup> ([thibaut@ebi.ac.uk](mailto:thibaut@ebi.ac.uk)), Kerstin Howe<sup>6</sup> ([kj2@ebi.ac.uk](mailto:kj2@ebi.ac.uk)), David A. Hume<sup>1,†</sup>  
10 ([david.hume@uq.edu.au](mailto:david.hume@uq.edu.au)), Osagie Izuogu<sup>3</sup> ([osagie@ebi.ac.uk](mailto:osagie@ebi.ac.uk)), Kristi Kim<sup>8</sup> ([kristi.kim07@gmail.com](mailto:kristi.kim07@gmail.com)),  
11 Sergey Koren<sup>10</sup> ([sergey.koren@nih.gov](mailto:sergey.koren@nih.gov)), Haibou Liu<sup>4</sup> ([haiboul2017@gmail.com](mailto:haiboul2017@gmail.com)), Nancy Manchanda<sup>11</sup>  
12 ([nancym@iastate.edu](mailto:nancym@iastate.edu)), Fergal J. Martin<sup>3</sup> ([fergal@ebi.ac.uk](mailto:fergal@ebi.ac.uk)), Dan J. Nonneman<sup>12</sup>  
13 ([dan.nonneman@ars.usda.gov](mailto:dan.nonneman@ars.usda.gov)), Rebecca E. O'Connor<sup>7</sup> ([r.o'connor@kent.ac.uk](mailto:r.o'connor@kent.ac.uk)), Adam M. Phillippy<sup>10</sup>  
14 ([adam.phillippy@nih.gov](mailto:adam.phillippy@nih.gov)), Gary A. Rohrer<sup>12</sup> ([gary.rohrer@ars.usda.gov](mailto:gary.rohrer@ars.usda.gov)), Benjamin D. Rosen<sup>13</sup>  
15 ([ben.rosen@usda.gov](mailto:ben.rosen@usda.gov)), Laurie A. Rund<sup>14</sup> ([larund@illinois.edu](mailto:larund@illinois.edu)), Carole A. Sargent<sup>2</sup>  
16 ([cas1001@cam.ac.uk](mailto:cas1001@cam.ac.uk)), Lawrence B. Schook<sup>14</sup> ([schook@illinois.edu](mailto:schook@illinois.edu)), Steven G. Schroeder<sup>13</sup>  
17 ([steven.schroeder@usda.gov](mailto:steven.schroeder@usda.gov)), Ariel S. Schwartz<sup>9</sup> ([ariel@denovium.com](mailto:ariel@denovium.com)), Ben M. Skinner<sup>2</sup>  
18 ([b.skinner@essex.ac.uk](mailto:b.skinner@essex.ac.uk)), Richard Talbot<sup>15</sup> ([richard.talbot@roslin.ed.ac.uk](mailto:richard.talbot@roslin.ed.ac.uk)), Elizabeth Tseng<sup>8</sup>  
19 ([etseng@pacificbiosciences.com](mailto:etseng@pacificbiosciences.com)), Christopher K. Tuggle<sup>4,11</sup> ([cktuggle@iastate.edu](mailto:cktuggle@iastate.edu)), Mick Watson<sup>1</sup>  
20 ([mick.watson@roslin.ed.ac.uk](mailto:mick.watson@roslin.ed.ac.uk)), Timothy P. L. Smith<sup>12\*</sup> ([tim.smith@ars.usda.gov](mailto:tim.smith@ars.usda.gov)), Alan L. Archibald<sup>1\*</sup>  
21 ([alan.archibald@roslin.ed.ac.uk](mailto:alan.archibald@roslin.ed.ac.uk))

22

23 Affiliations

24 <sup>1</sup>The Roslin Institute and Royal (Dick) School of Veterinary Studies, University of Edinburgh, Edinburgh  
25 EH25 9RG, U.K.

26 <sup>2</sup>Department of Pathology, University of Cambridge, Cambridge CB2 1QP, U.K.



27 <sup>3</sup>European Molecular Biology Laboratory, European Bioinformatics Institute, Hinxton, CB10 1SD, U.K.

28 <sup>4</sup>Department of Animal Science, Iowa State University, Ames, Iowa, U.S.A.

29 <sup>5</sup>Dairy Forage Research Center, USDA-ARS, Madison, Wisconsin, U.S.A.

30 <sup>6</sup>Wellcome Sanger Institute, Cambridge, CB10 1SA, U.K.

31 <sup>7</sup>School of Biosciences, University of Kent, Canterbury CT2 7AF, U.K.

32 <sup>8</sup>Pacific Biosciences, Menlo Park, California, U.S.A.

33 <sup>9</sup>Denovium Inc., San Diego, California, U.S.A.

34 <sup>10</sup>Genome Informatics Section, Computational and Statistical Genomics Branch, National Human  
35 Genome Research Institute, Bethesda, Maryland, U.S.A.

36 <sup>11</sup>Bioinformatics and Computational Biology Program, Iowa State University, Ames, Iowa, U.S.A.

37 <sup>12</sup>USDA-ARS U.S. Meat Animal Research Center, Clay Center, Nebraska 68933, U.S.A.

38 <sup>13</sup>Animal Genomics and Improvement Laboratory, USDA-ARS, Beltsville, Maryland, U.S.A.

39 <sup>14</sup>Department of Animal Sciences, University of Illinois, Urbana, Illinois, U.S.A.

40 <sup>15</sup>Edinburgh Genomics, University of Edinburgh, Edinburgh EH9 3FL, U.K.

41

42 † Current address: Mater Research Institute-University of Queensland, Translational Research  
43 Institute, Brisbane, QLD 4102, Australia

44

45 \*Corresponding authors: [alan.archibald@roslin.ed.ac.uk](mailto:alan.archibald@roslin.ed.ac.uk) [tim.smith@ARS.USDA.GOV](mailto:tim.smith@ARS.USDA.GOV)

46 [mick.watson@roslin.ed.ac.uk](mailto:mick.watson@roslin.ed.ac.uk)

47

48

49 **Abstract**

50 The domestic pig (*Sus scrofa*) is important both as a food source and as a biomedical model given its  
51 similarity in size, anatomy, physiology, metabolism, pathology and pharmacology to humans. The draft  
52 reference genome (Sscrofa10.2) of a purebred Duroc female pig established using older clone-based  
53 sequencing methods was incomplete and unresolved redundancies, short range order and orientation  
54 errors and associated misassembled genes limited its utility. We present two annotated highly  
55 contiguous chromosome-level genome assemblies created with more recent long read technologies  
56 and a whole genome shotgun strategy, one for the same Duroc female (Sscrofa11.1) and one for an  
57 outbred, composite breed male (USMARCv1.0). Both assemblies are of substantially higher (>90-fold)  
58 continuity and accuracy than Sscrofa10.2. These highly contiguous assemblies plus annotation of a  
59 further 11 short read assemblies provide an unprecedented view of the genetic make-up of this  
60 important agricultural and biomedical model species. We propose that the improved Duroc assembly  
61 (Sscrofa11.1) become the reference genome for genomic research in pigs.

62

63 **Keywords**

64 Pig genomes, reference assembly, pig, genome annotation

65

## 66 **Background**

67 High quality, richly annotated reference genome sequences are key resources and provide important  
68 frameworks for the discovery and analysis of genetic variation and for linking genotypes to function.  
69 In farmed animal species such as the domestic pig (*Sus scrofa*) genome sequences have been integral  
70 to the discovery of molecular genetic variants and the development of single nucleotide  
71 polymorphism (SNP) chips [1] and enabled efforts to dissect the genetic control of complex traits, such  
72 as growth, feed conversion, body composition, reproduction, behaviour and responses to infectious  
73 diseases [2].

74

75 Genome sequences are not only an essential resource for enabling research but also for applications  
76 in the life sciences. Genomic selection, in which associations between thousands of SNPs and trait  
77 variation as established in a phenotyped training population are used to choose amongst selection  
78 candidates for which there are SNP data but no phenotypes, has delivered genomics-enabled genetic  
79 improvement in farmed animals [3] and plants. From its initial successful application in dairy cattle  
80 breeding, genomic selection is now being used in many sectors within animal and plant breeding,  
81 including by leading pig breeding companies [4, 5].

82

83 The domestic pig (*Sus scrofa*) has importance not only as a source of animal protein but also as a  
84 biomedical model. The choice of the optimal animal model species for pharmacological or toxicology  
85 studies can be informed by knowledge of the genome and gene content of the candidate species  
86 including pigs [6]. A high quality, richly annotated genome sequence is also essential when using gene  
87 editing technologies to engineer improved animal models for research or as sources of cells and tissue  
88 for xenotransplantation and potentially for improved productivity [7, 8].

89

90 The highly continuous pig genome sequences reported here are built upon a quarter of a century of  
91 effort by the global pig genetics and genomics research community including the development of

92 recombination and radiation hybrid maps [9, 10], cytogenetic and Bacterial Artificial Chromosome  
93 (BAC) physical maps [11, 12] and a draft reference genome sequence [13].

94

95 The previously published draft pig reference genome sequence (Sscrofa10.2), developed under the  
96 auspices of the Swine Genome Sequencing Consortium (SGSC), has a number of significant deficiencies  
97 [14-17]. The BAC-by-BAC hierarchical shotgun sequence approach [18] using Sanger sequencing  
98 technology can yield a high quality genome sequence as demonstrated by the public Human Genome  
99 Project. However, with a fraction of the financial resources of the Human Genome Project, the  
100 resulting draft pig genome sequence comprised an assembly, in which long-range order and  
101 orientation is good, but the order and orientation of sequence contigs within many BAC clones was  
102 poorly supported and the sequence redundancy between overlapping sequenced BAC clones was  
103 often not resolved. Moreover, about 10% of the pig genome, including some important genes, were  
104 not represented (e.g. *CD163*), or incompletely represented (e.g. *IGF2*) in the assembly [19]. Whilst the  
105 BAC clones represent an invaluable resource for targeted sequence improvement and gap closure as  
106 demonstrated for chromosome X (SSCX) [20], a clone-by-clone approach to sequence improvement is  
107 expensive notwithstanding the reduced cost of sequencing with next-generation technologies.

108

109 The dramatically reduced cost of whole genome shotgun sequencing using Illumina short read  
110 technology has facilitated the sequencing of several hundred pig genomes [17, 21, 22]. Whilst a few  
111 of these additional pig genomes have been assembled to contig level, most of these genome  
112 sequences have simply been aligned to the reference and used as a resource for variant discovery.

113

114 The increased capability and reduced cost of third generation long read sequencing technology as  
115 delivered by Pacific Biosciences and Oxford Nanopore platforms, have created the opportunity to  
116 generate the data from which to build highly contiguous genome sequences as illustrated recently for  
117 cattle [23, 24]. Here we describe the use of Pacific Biosciences (PacBio) long read technology to

118 establish highly continuous pig genome sequences that provide substantially improved resources for  
119 pig genetics and genomics research and applications.

120

121 **Results**

122 Two individual pigs were sequenced independently: a) TJ Tabasco (Duroc 2-14) i.e. the sow that was  
123 the primary source of DNA for the published draft genome sequence (Sscrofa10.2) [13] and b)  
124 MARC1423004 which was a crossbred barrow (i.e. castrated male pig) from a composite population  
125 (approximately ½ Landrace, ¼ Duroc and ¼ Yorkshire) at the USDA Meat Animal Research Center. The  
126 former allowed us to build upon the earlier draft genome sequence, exploit the associated CHORI-242  
127 BAC library resource (<https://bacpacresources.org/> <http://bacpacresources.org/porcine242.htm>) and  
128 evaluate the improvements achieved by comparison with Sscrofa10.2. The latter allowed us to assess  
129 the relative efficacy of a simpler whole genome shotgun sequencing and Chicago Hi-Rise scaffolding  
130 strategy [25]. This second assembly also provided data for the Y chromosome, and supported  
131 comparison of haplotypes between individuals. In addition, full-length transcript sequences were  
132 collected for multiple tissues from the MARC1423004 animal, and used in annotating both genomes.

133

134 Sscrofa11.1 assembly

135 Approximately sixty-five fold coverage (176 Gb) of the genome of TJ Tabasco (Duroc 2-14) was  
136 generated using Pacific Biosciences (PacBio) single-molecule real-time (SMRT) sequencing technology.  
137 A total of 213 SMRT cells produced 12,328,735 subreads of average length 14,270 bp and with a read  
138 N50 of 19,786 bp (Table S1). Reads were corrected and assembled using Falcon (v.0.4.0) [26],  
139 achieving a minimum corrected read cutoff of 13 kb that provided 19-fold genome coverage for input  
140 resulting in an initial assembly comprising 3,206 contigs with a contig N50 of 14.5 Mb.

141

142 The contigs were mapped to the previous draft assembly (Sscrofa10.2) using Nucmer [27]. The long  
143 range order of the Sscrofa10.2 assembly was based on fingerprint contig (FPC) [12] and radiation  
144 hybrid physical maps with assignments to chromosomes based on fluorescent *in situ* hybridisation  
145 data. This alignment of Sscrofa10.2 and the contigs from the initial Falcon assembly of the PacBio data  
146 provided draft scaffolds that were tested for consistency with paired BAC and fosmid end sequences

147 and the radiation hybrid map [9]. The draft scaffolds also provided a framework for gap closure using  
148 PBJelly [28], or finished quality Sanger sequence data generated from CHORI-242 BAC clones from  
149 earlier work [13, 20].

150

151 Remaining gaps between contigs within scaffolds, and between scaffolds predicted to be adjacent on  
152 the basis of other available data, were targeted for gap filling with a combination of unplaced contigs  
153 and previously sequenced BACs, or by identification and sequencing of BAC clones predicted from  
154 their end sequences to span the gaps. The combination of methods filled 2,501 gaps and reduced the  
155 number of contigs in the assembly from 3,206 to 705. The assembly, Sscrofa11 (GCA\_000003025.5),  
156 had a final contig N50 of 48.2 Mb, only 103 gaps in the sequences assigned to chromosomes, and only  
157 583 remaining unplaced contigs (Table 1). Two acrocentric chromosomes (SSC16, SSC18) were each  
158 represented by single, unbroken contigs. The SSC18 assembly also includes centromeric and telomeric  
159 repeats (Tables S2, S3; Figs. S1, S2), albeit the former probably represent a collapsed version of the  
160 true centromere. The reference genome assembly was completed by adding Y chromosome  
161 sequences from other sources (GCA\_900119615.2) [20] because TJ Tabasco (Duroc 2-14) was female.  
162 The resulting reference genome sequence was termed Sscrofa11.1 and deposited in the public  
163 sequence databases (GCA\_000003025.6) (Table 1).

164

165 The medium to long range order and orientation of Sscrofa11.1 assembly was assessed by comparison  
166 to an existing radiation hybrid (RH) map [9]. The comparison strongly supported the overall accuracy  
167 of the assembly (Fig. 1a), despite the fact that the RH map was prepared from a cell line of a different  
168 individual. There is one major disagreement between the RH map and the assembly on chromosome  
169 3, which will need further investigating. The only other substantial disagreement on chromosome 9,  
170 is explained by a gap in the RH map [9]. The assignment and orientation of the Sscrofa11.1 scaffolds  
171 to chromosomes was confirmed with fluorescent *in situ* hybridisation (FISH) of BAC clones (Table S4,  
172 Fig. S3). The Sscrofa11.1 and USMARCv1.0 assemblies were searched using BLAST with sequences



173 derived from the BAC clones which had been used as probes for the FISH analyses. For most BAC  
174 clones these sequences were BAC end sequences [12], but in some cases these sequences were  
175 incomplete or complete BAC clone sequences [13, 20]. The links between the genome sequence and  
176 the BAC clones used in cytogenetic analyses by fluorescent *in situ* hybridization are summarised in  
177 Table S4. The fluorescent *in situ* hybridization results indicate areas where future assemblies might be  
178 improved. For example, the Sscrofa11.1 unplaced scaffolds contig 1206 and contig1914 may contain  
179 sequences that could be added to end of the long arms of SSC1 and SSC7 respectively.

180

181 The quality of the Sscrofa11 assembly, which corresponds to Sscrofa11.1 after the exclusion of SSCY,  
182 was assessed as described previously for the existing Sanger sequence based draft assembly  
183 (Sscrofa10.2) [14]. Alignments of Illumina sequence reads from the same female pig were used to  
184 identify regions of low quality (LQ; regions with high GC normalised coverage, prevalence of  
185 improperly paired reads and prevalence of reads with improper insert sizes) or low coverage (LC;  
186 regions with low GC normalised coverage) (Table 2).. The analysis confirms that Sscrofa11 represents  
187 a significant improvement over the Sscrofa10.2 draft assembly. For example, the Low Quality Low  
188 Coverage (LQLC) proportion of the genome sequence has dropped from 33.07% to 16.3% when  
189 repetitive sequence is not masked, and falls to 1.6% when repeats are masked prior to read alignment.

190 The remaining LQLC segments of Sscrofa11 have an average GC content of 61.6%. Thus, these regions  
191 may represent sequence where short read coverage is low due to the known systematic bias of the  
192 short read platform against extreme GC content sequences, rather than deficiencies of the assembly..

193

194 The Sscrofa11.1 assembly was also assessed visually using gEVAL [29]. The improvement in short range  
195 order and orientation as revealed by alignments with isogenic BAC and fosmid end sequences is  
196 illustrated for a particularly poor region of Sscrofa10.2 on chromosome 12 (Fig. S4). The problems in  
197 this area of Sscrofa10.2 arose from failures to order and orient the sequence contigs and resolve the  
198 redundancies between these sequence contigs within BAC clone CH242-147O24 (FP102566.2). The

199 improved contiguity in Sscrofa11.1 not only resolves these local order and orientation errors, but also  
200 facilitates the annotation of a complete gene model for the *ABR* locus. Further examples of  
201 comparisons of Sscrofa10.2 and Sscrofa11.1 reveal improvements in contiguity, local order and  
202 orientation and gene models (Fig. S5 to S7).

203

#### 204 USMARCv1.0 assembly

205 Approximately sixty-five fold coverage of the genome of the MARC1423004 barrow was generated on  
206 a PacBio RSII instrument. The sequence was collected during the transition from P5/C3 to P6/C4  
207 chemistry, with approximately equal numbers of subreads from each chemistry. A total of 199 cells of  
208 P5/C3 chemistry produced 95.3 Gb of sequence with mean subread length of 5.1 kb and subread N50  
209 of 8.2 kb. A total of 127 cells of P6/C4 chemistry produced 91.6 Gb of sequence with mean subread  
210 length 6.5 kb and subread N50 of 10.3 kb, resulting in an overall average subread length, including  
211 data from both chemistries, of 6.4 kb. The reads were assembled using Celera Assembler 8.3rc2 [30]  
212 and Falcon (<https://pb-falcon.readthedocs.io/en/latest/about.html>). The resulting assemblies were  
213 compared and the Celera Assembler result was selected based on better agreement with a Dovetail  
214 Chicago<sup>®</sup> library [25] (i.e. there was a lower proportion of conflicting links between read pairs from  
215 the Chicago<sup>®</sup> library), and was used to create a scaffolded assembly with the HiRise™ scaffolder  
216 consisting of 14,818 contigs with a contig N50 of 6.372 Mb (GenBank accession GCA\_002844635.1;  
217 Table 1). The USMARCv1.0 scaffolds were therefore completely independent of the existing  
218 Sscrofa10.2 or new Sscrofa11.1 assemblies, and they can act as supporting evidence where they agree  
219 with those assemblies. However, chromosome assignment of the scaffolds was performed by  
220 alignment to Sscrofa10.2, and does not constitute independent confirmation of this ordering. The  
221 assignment of these scaffolds to individual chromosomes was confirmed post-hoc by FISH analysis as  
222 described for Sscrofa11.1 above. The FISH analysis revealed that several of these chromosome  
223 assemblies (SSC1, 5, 6-11, 13-16) are inverted with respect to the cytogenetic convention for pig

224 chromosome (Table S4; Figs. S3, S8 to S10). After correcting the orientation of these inverted scaffolds,  
225 there is good agreement between the USMARCv1.0 assembly and the RH map [9] (Fig. 1b, Table S5).

226

#### 227 Sscrofa11.1 and USMARCv1.0 are co-linear

228 The alignment of the two PacBio assemblies reveals a high degree of agreement and co-linearity, after  
229 correcting the inversions of several USMARCv1.0 chromosome assemblies (Fig. S11). The agreement  
230 between the Sscrofa11.1 and USMARCv1.0 assemblies is also evident in comparisons of specific loci  
231 (Figs. S5 to S7) although with some differences (e.g. Fig. S6). The whole genome alignment of  
232 Sscrofa11.1 and USMARCv1.0 (Fig. S11) masks some inconsistencies that are evident when the  
233 alignments are viewed on a single chromosome-by-chromosome basis (Figs. S8 to S10). It remains to  
234 be determined whether the small differences between the assemblies represent errors in the  
235 assemblies, or true structural variation between the two individuals (see discussion of the *ERLIN1*  
236 locus below).

237

238 Pairwise comparisons amongst the Sscrofa10.2, Sscrofa11.1 and USMARCv1.0 assemblies using the  
239 Assemblytics tools [31] (<http://assemblytics.com>) revealed a peak of insertions and deletion with sizes  
240 of about 300 bp (Figs. S12a to S12c). We assume that these correspond to SINE elements. Both  
241 Sscrofa11.1 and USMARCv1.0 assemblies have more differences against Sscrofa10.2 (33,347 and  
242 44,023 respectively) than against each other (28,733). This is despite the fact that Sscrofa11.1 and  
243 Sscrofa10.2 represent the same pig genome. While some differences between Sscrofa10.2 and  
244 Sscrofa11.1 may be due to differences in which haplotype has been captured in the assembly, the  
245 reduction in low quality and low coverage regions and the dramatic decrease in differences versus  
246 USMARCv1.0 leads us to conclude that the majority are improvements in the Sscrofa11.1 assembly.  
247 The differences between the Sscrofa11.1 and USMARCv1.0 will represent a mix of true structural  
248 differences and assembly errors that will require further research to resolve. The Sscrofa11.1 and  
249 USMARCv1.0 assemblies were also compared to 11 Illumina short read assemblies [17] (Table S6).

250

251 Repetitive sequences, centromeres and telomeres

252 The repetitive sequence content of the Sscrofa11.1 and USMARCv1.0 was identified and  
253 characterised. These analyses allowed the identification of centromeres and telomeres for several  
254 chromosomes. The previous reference genome (Sscrofa10.2) that was established from Sanger  
255 sequence data and a minipig genome (minipig\_v1.0, GCA\_000325925.2) that was established from  
256 Illumina short read sequence data were also included for comparison. The numbers of the different  
257 repeat classes and the average mapped lengths of the repetitive elements identified in these four pig  
258 genome assemblies are summarised in Figures S13 and S14, respectively.

259

260 Putative telomeres were identified at the proximal ends of Sscrofa11.1 chromosome assemblies of  
261 SSC2, SSC3, SSC6, SSC8, SSC9, SSC14, SSC15, SSC18 and SSCX (Fig S1; Table S2). Putative centromeres  
262 were identified in the expected locations in the Sscrofa11.1 chromosome assemblies for SSC1-7, SSC9,  
263 SSC13 and SSC18 (Fig S2, Table S3). For the chromosome assemblies of each of SSC8, SSC11 and SSC15  
264 two regions harbouring centromeric repeats were identified. Pig chromosomes SSC1-12 plus SSCX and  
265 SSCY are all metacentric, whilst chromosomes SSC13-18 are acrocentric. The putative centromeric  
266 repeats on SSC17 do not map to the expected end of the chromosome assembly.

267

268 Completeness of the assemblies

269 The Sscrofa11.1 and USMARCv1.0 assemblies were assessed for completeness using two tools, BUSCO  
270 (Benchmarking Universal Single-Copy Orthologs) [32] and Cogent  
271 (<https://github.com/Magdoll/Cogent>). BUSCO uses a database of expected gene content based on  
272 near-universal single-copy orthologs from species with genomic data, while Cogent uses  
273 transcriptome data from the organism being sequenced, and therefore provides an organism-specific  
274 view of genome completeness. BUSCO analysis suggests both new assemblies are highly complete,  
275 with 93.8% and 93.1% of BUSCOs complete for Sscrofa11.1 and USMARCv1.0 respectively, a marked

276 improvement on the 80.9% complete in Sscrofa10.2 and comparable to the human and mouse  
277 reference genome assemblies (Table S7).

278

279 Cogent is a tool that identifies gene families and reconstructs the coding genome using full-length,  
280 high-quality (HQ) transcriptome data without a reference genome and can be used to check  
281 assemblies for the presence of these known coding sequences. PacBio transcriptome (Iso-Seq) data  
282 consisting of high-quality isoform sequences from 7 tissues (diaphragm, hypothalamus, liver, skeletal  
283 muscle (*longissimus dorsi*), small intestine, spleen and thymus) [33] from the pig whose DNA was used  
284 as the source for the USMARCv1.0 assembly were pooled together for Cogent analysis. Cogent  
285 partitioned 276,196 HQ isoform sequences into 30,628 gene families, of which 61% had at least 2  
286 distinct transcript isoforms. Cogent then performed reconstruction on the 18,708 partitions. For each  
287 partition, Cogent attempts to reconstruct coding 'contigs' that represent the ordered concatenation  
288 of transcribed exons as supported by the isoform sequences. The reconstructed contigs were then  
289 mapped back to Sscrofa11.1 and contigs that could not be mapped or map to more than one position  
290 are individually examined. There were five genes that were present in the Iso-Seq data, but missing in  
291 the Sscrofa11.1 assembly. In each of these five cases, a Cogent partition (which consists of 2 or more  
292 transcript isoforms of the same gene, often from multiple tissues) exists in which the predicted  
293 transcript does not align back to Sscrofa11.1. NCBI-BLASTN of the isoforms from the partitions  
294 revealed them to have near perfect hits with existing annotations for *CHAMP1*, *ERLIN1*, *IL1RN*, *MB*,  
295 and *PSD4* for other species.

296

297 *ERLIN1* is missing from its predicted location on SSC14 between *CHUK* and *CPN1* gene in Sscrofa11.1.  
298 There is good support for the Sscrofa11.1 assembly in the region from the BAC end sequence  
299 alignments suggesting this area may represent a true haplotype. Indeed, a copy number variant (CNV)  
300 nsv1302227 has been mapped to this location on SSC14 [34] and the *ERLIN1* gene sequences present  
301 in BAC clone CH242-513L2 (ENA: CT868715.3) were incorporated into the earlier Sscrofa10.2

302 assembly. However, an alternative haplotype containing *ERLIN1* was not found in any of the  
303 assembled contigs from Falcon and this will require further investigation. The *ERLIN1* locus is present  
304 on SSC14 in the USMARCv1.0 assembly (30,107,816-30,143,074; note the USMARCv1.0 assembly of  
305 SSC14 is inverted relative to Sscrofa11.1). Of eleven short read pig genome assemblies [17] that have  
306 been annotated with the Ensembl pipeline (Ensembl release 98, September 2019) *ERLIN1* sequences  
307 are present in the expected genomic context in all eleven genome assemblies. As the *ERLIN1* gene is  
308 located at the end of a contig in eight of these short read assemblies, it suggests that this region of  
309 the pig genome presents difficulties for sequencing and assembly and the absence of *ERLIN1* in the  
310 Sscrofa11.1 is more likely to be an assembly error.

311

312 The other 4 genes are annotated in neither Sscrofa10.2 nor Sscrofa11.1. Two of these genes, *IL1RN*  
313 and *PSD4*, are present in the original Falcon contigs, however they were trimmed off during the contig  
314 QC stage because of apparent abnormal Illumina, BAC and fosmid mapping in the region which was  
315 likely caused by the repetitive nature of their expected location on chromosome 3 where a gap is  
316 present. The *IL1RN* and *PSD4* genes are present in the USMARCv1.0, albeit their location is anomalous,  
317 and are also present in the 11 short read assemblies [17]. *CHAMP1* (ENSSSCG00070014091) is present  
318 in the USMARCv1.0 assembly in the sub-telomeric region of the q-arm, after correcting the inversion  
319 of the USMARCv1.0 scaffold and is also present in all 11 short read assemblies [17]. After correcting  
320 the orientation of the USMARCv1.0 chromosome 11 scaffold there is a small inversion of the distal  
321 1.07 Mbp relative to the Sscrofa11.1 assembly; this region harbours the *CHAMP1* gene. The  
322 orientation of the Sscrofa11.1 chromosome 11 assembly in this region is consistent with the  
323 predictions of the human-pig comparative map [35]. The myoglobin gene (*MB*) is present in the  
324 expected location in the USMARCv1.0 assembly flanked by *RASD2* and *RBFOX2*. Partial *MB* sequences  
325 are present distal to *RBFOX2* on chromosome 5 in the Sscrofa11.1 assembly. As there is no gap here  
326 in the Sscrofa11.1 assembly it is likely that the incomplete *MB* is a result of a misassembly in this  
327 region. This interpretation is supported by a break in the pairs of BAC and fosmid end sequences that

328 map to this region of the Sscrofa11.1 assembly. Some of the expected gene content missing from this  
329 region of the Sscrofa11.1 chromosome 5 assembly, including *RASD2*, *HMOX1* and *LARGE1* is present  
330 on an unplaced scaffold (AEMK02000361.1). Cogent analysis also identified 2 cases of potential  
331 fragmentation in the Sscrofa11.1 genome assembly that resulted in the isoforms being mapped to two  
332 separate loci, though these will require further investigation. In summary, the BUSCO and Cogent  
333 analyses indicate that the Sscrofa11.1 assembly captures a very high proportion of the expressed  
334 elements of the genome.

335

### 336 Improved annotation

337 Annotation of Sscrofa11.1 was carried out with the Ensembl annotation pipeline and released via the  
338 Ensembl Genome Browser [36] ([http://www.ensembl.org/Sus\\_scrofa/Info/Index](http://www.ensembl.org/Sus_scrofa/Info/Index)) (Ensembl release  
339 90, August 2017). Statistics for the annotation as updated in June 2019 (Ensembl release 98,  
340 September 2019) are listed in Table 3. This annotation is more complete than that of Sscrofa10.2 and  
341 includes fewer fragmented genes and pseudogenes.

342

343 The annotation pipeline utilised extensive short read RNA-Seq data from 27 tissues and long read  
344 PacBio Iso-Seq data from 9 adult tissues. This provided an unprecedented window into the pig  
345 transcriptome and allowed for not only an improvement to the main gene set, but also the generation  
346 of tissue-specific gene tracks from each tissue sample. The use of Iso-Seq data also improved the  
347 annotation of UTRs, as they represent transcripts sequenced across their full length from the polyA  
348 tract.

349

350 In addition to improved gene models, annotation of the Sscrofa11.1 assembly provides a more  
351 complete view of the porcine transcriptome than annotation of the previous assembly (Sscrofa10.2;  
352 Ensembl releases 67-89, May 2012 – May 2017) with increases in the numbers of transcripts  
353 annotated (Table 3). However, the number of annotated transcripts remains lower than in the human



354 and mouse genomes. The annotation of the human and mouse genomes and in particular the gene  
355 content and encoded transcripts has been more thorough as a result of extensive manual annotation.

356

357 Efforts were made to annotate important classes of genes, in particular immunoglobulins and  
358 olfactory receptors. For these genes, sequences were downloaded from specialist databases and the  
359 literature in order to capture as much detail as possible (see supplementary information for more  
360 details).

361

362 These improvements in terms of the resulting annotation were evident in the results of the  
363 comparative genomics analyses run on the gene set. The previous annotation had 12,919 one-to-one  
364 orthologs with human, while the new annotation of the Sscrofa11.1 assembly has 15,544. Similarly, in  
365 terms of conservation of synteny, the previous annotation had 11,661 genes with high confidence  
366 gene order conservation scores, while the new annotation has 15,958. There was also a large  
367 reduction in terms of genes that were either abnormally short or split when compared to their  
368 orthologs in the new annotation.

369

370 The Sscrofa11.1 assembly has also been annotated using the NCBI pipeline  
371 ([https://www.ncbi.nlm.nih.gov/genome/annotation\\_euk/Sus\\_scrofa/106/](https://www.ncbi.nlm.nih.gov/genome/annotation_euk/Sus_scrofa/106/)). We have compared  
372 these two annotations. The Ensembl and NCBI annotations of Sscrofa11.1 are broadly similar (Table  
373 S8). There are 17,676 protein coding genes and 1,700 non-coding genes in common. However, 540 of  
374 the genes annotated as protein-coding by Ensembl are annotated as non-coding or pseudogenes by  
375 NCBI and 227 genes annotated as non-coding by NCBI are annotated as protein-coding (215) or as  
376 pseudogenes (12) by Ensembl. The NCBI RefSeq annotation can be visualised in the Ensembl Genome  
377 Browser by loading the RefSeq GFF3 track and the annotations compared at the individual locus level.  
378 Similarly, the Ensembl annotated genes can be visualised in the NCBI Genome Browser. Despite  
379 considerable investment there are also differences in the Ensembl and NCBI annotation of the human

380 reference genome sequence with 20,444 and 19,755 protein-coding genes on the primary assembly,  
381 respectively. The MANE (Matched Annotation from NCBI and EMBL-EBI) project was launched to  
382 resolve these differences and identify a matched representative transcript for each human protein-  
383 coding gene (<https://www.ensembl.org/info/genome/genebuild/mane.html>). To date a MANE  
384 transcript has been identified for 12,985 genes.

385

386 We have also annotated the USMARCv1.0 assembly using the Ensembl pipeline [36] and this  
387 annotation was released via the Ensembl Genome Browser  
388 ([https://www.ensembl.org/Sus\\_scrofa\\_usmarc/Info/Index](https://www.ensembl.org/Sus_scrofa_usmarc/Info/Index)) (Ensembl release 97, July 2019; see Table  
389 3 for summary statistics). More recently, we have annotated a further eleven short read pig genome  
390 assemblies [17] (Ensembl release 98, September 2019, see Tables S6 and S11 for summary statistics  
391 for the assemblies and annotation, respectively).

392

### 393 SNP chip probes mapped to assemblies

394 The probes from four commercial SNP chips were mapped to the Sscrofa10.2, Sscrofa11.1 and  
395 USMARCv1.0 assemblies. We identified 1,709, 56, and 224 markers on the PorcineSNP60, GGP LD and  
396 80K commercial chips that were previously unmapped and now have coordinates on the Sscrofa11.1  
397 reference (Table S9). These newly mapped markers can now be imputed into a cross-platform,  
398 common set of SNP markers for use in genomic selection. Additionally, we have identified areas of the  
399 genome that are poorly tracked by the current set of commercial SNP markers. The previous  
400 Sscrofa10.2 reference had an average marker spacing of 3.57 kbp (Stdev: 26.5 kb) with markers from  
401 four commercial genotyping arrays. We found this to be an underestimate of the actual distance  
402 between markers, as the Sscrofa11.1 reference coordinates consisted of an average of 3.91 kbp  
403 (Stdev: 14.9 kbp) between the same set of markers. We also found a region of 2.56 Mbp that is  
404 currently devoid of suitable markers on the new reference.

405

406 A Spearman's rank order ( $\rho$ ) value was calculated for each assembly (alternative hypothesis:  $\rho$  is  
407 equal to zero;  $p < 2.2 \times 10^{-16}$ ): Sscrofa10.2: 0.88464; Sscrofa11.1: 0.88890; USMARCv1.0: 0.81260. This  
408 rank order comparison was estimated by ordering all of the SNP probes from all chips by their listed  
409 manifest coordinates against their relative order in each assembly (with chromosomes ordered by  
410 karyotype). Any unmapped markers in an assembly were penalized by giving the marker a "-1" rank in  
411 the assembly ranking order.

412

413 In order to examine general linear order of placed markers on each assembly, the marker rank order  
414 (y axis; used above in the Spearman's rank order test) was plotted against the rank order of the probe  
415 rank order on the manifest file (x axis) (Fig. S15). The analyses revealed some interesting artefacts that  
416 suggest that the SNP manifest coordinates for the porcine 60K SNP chip are still derived from an  
417 obsolete (Sscrofa9) reference in contrast to all other manifests (Sscrofa10.2). Also, it confirms that  
418 several of the USMARCv1.0 chromosome scaffolds are inverted with respect to the canonical  
419 orientation of pig chromosomes. The large band of points at the top of the plot corresponds to marker  
420 mappings on the unplaced contigs of each assembly. These unplaced contigs often correspond to  
421 assemblies of alternative haplotypes in heterozygous regions of the reference animal [24]. Marker  
422 placement on these segments suggests that these variants are tracking different haplotypes in the  
423 population, which is the desired intent of genetic markers used in Genomic Selection.

424

425 **Discussion**

426 We have assembled a superior, extremely continuous reference assembly (Sscrofa11.1) by leveraging  
427 the excellent contig lengths provided by long reads, and a wealth of available data including Illumina  
428 paired-end, BAC end sequence, finished BAC sequence, fosmid end sequences, and the earlier curated  
429 draft assembly (Sscrofa10.2). The pig genome assemblies USMARCv1.0 and Sscrofa11.1 reported here  
430 are 92-fold to 694-fold respectively, more continuous than the published draft reference genome  
431 sequence (Sscrofa10.2) [13]. The new pig reference genome assembly (Sscrofa11.1) with its contig  
432 N50 of 48,231,277 bp and 506 gaps compares favourably with the current human reference genome  
433 sequence (GRCh38.p12) that has a contig N50 of 57,879,411 bp and 875 gaps (Table 1). Indeed,  
434 considering only the chromosome assemblies built on PacBio long read data (i.e. Sscrofa11 - the  
435 autosomes SSC1-SSC18 plus SSCX), there are fewer gaps in the pig assembly than in human reference  
436 autosomes and HSAX assemblies. Most of the gaps in the Sscrofa11.1 reference assembly are  
437 attributed to the fragmented assembly of SSCY. The capturing of centromeres and telomeres for  
438 several chromosomes (Tables S2, S3; Figs. S1, S2) provides further evidence that the Sscrofa11.1  
439 assembly is more complete. The increased contiguity of Sscrofa11.1 is evident in the graphical  
440 comparison to Sscrofa10.2 illustrated in Figure 2.

441

442 The improvements in the reference genome sequence (Sscrofa11.1) relative to the draft assembly  
443 (Sscrofa10.2) [13] are not restricted to greater continuity and fewer gaps. The major flaws in the BAC  
444 clone-based draft assembly were i) failures to resolve the sequence redundancy amongst sequence  
445 contigs within BAC clones and between adjacent overlapping BAC clones and ii) failures to accurately  
446 order and orient the sequence contigs within BAC clones. Although the Sanger sequencing technology  
447 used has a much lower raw error rate than the PacBio technology, the sequence coverage was only 4-  
448 6 fold across the genome. The improvements in continuity and quality (Table 2; Figs. S5 to S7) have  
449 yielded a better template for annotation resulting in better gene models. The Sscrofa11.1 and  
450 USMARCv1.0 assemblies are classed as 4|4|1 and 3|5|1 [ $10^X$ : N50 contig (kb);  $10^Y$ : N50 scaffold (kb);

451 Z = 1|0: assembled to chromosome level] respectively compared to Sscrofa10.2 as 1|2|1 and the  
452 human GRCh38p5 assembly as 4|4|1 (see <https://geval.sanger.ac.uk>).

453

454 The improvement in the complete BUSCO (Benchmarking Universal Single-Copy Orthologs) genes  
455 indicates that both Sscrofa11.1 and USMARCv1.0 represent superior templates for annotation of gene  
456 models than the draft Sscrofa10.2 assembly and are comparable to the finished human and mouse  
457 reference genome sequences (Table S7). Further, a companion bioinformatics analysis of available Iso-  
458 seq and companion Illumina RNA-seq data across the nine tissues surveyed has identified a large  
459 number (>54,000) of novel transcripts [33]. A majority of these transcripts are predicted to be spliced  
460 and validated by RNA-seq data. Beiki and colleagues identified 10,465 genes expressing Iso-seq  
461 transcripts that are present on the Sscrofa11.1 assembly, but which are unannotated in current NCBI  
462 or Ensembl annotations.

463

464 Whilst the alignment of the Sscrofa11.1 and USMARCv1.0 assemblies revealed that several of the  
465 USMARCv1.0 chromosome assemblies are inverted relative to Sscrofa11.1 and the cytogenetic map.  
466 Such inversions are due to the agnostic nature of genome assembly and post-assembly polishing  
467 programs. Unless these are corrected post-hoc by manual curation, they result in artefactual  
468 inversions of the entire chromosome. However, such inversions do not generally impact downstream  
469 analysis that does not involve the relative order/orientation of whole chromosomes.

470

471 Whether the differences between Sscrofa11.1 and USMARCv1.0 in order and orientation within  
472 chromosomes represent assembly errors or real chromosomal differences will require further  
473 research. The sequence present at the telomeric end of the long arm of the USMARCv1.0 chromosome  
474 7 assembly (after correcting the orientation of the USMARCv1.0 SSC7) is missing from the Sscrofa11.1  
475 SSC7 assembly, and currently located on a 3.8 Mbp unplaced scaffold (AEMK02000452.1). This  
476 unplaced scaffold harbours several genes including *DIO3*, *CKB* and *NUDT14* whose orthologues map

477 to human chromosome 14 as would be predicted from the pig-human comparative map [35]. This  
478 omission will be corrected in an updated assembly in future.

479

480 We demonstrate moderate improvements in the placement and ordering of commercial SNP  
481 genotyping markers on the Sscrofa11.1 reference genome which will impact future genomic selection  
482 programs. The reference-derived order of SNP markers plays a significant role in imputation accuracy,  
483 as demonstrated by a whole-genome survey of misassembled regions in cattle that found a correlation  
484 between imputation errors and misassemblies [37]. The gaps in SNP chip marker coverage that we  
485 identified will inform future marker selection surveys, which are likely to prioritize regions of the  
486 genome that are not currently being tracked by marker variants in close proximity to potential causal  
487 variant sites. In addition to the gaps in coverage provided by the commercial SNP chips there are  
488 regions of the genome assemblies that are devoid of annotated sequence variation as hitherto  
489 sequence variants have been discovered against incomplete genome assemblies. Thus, there is a need  
490 to re-analyse good quality re-sequence data against the new assemblies in order to provide a better  
491 picture of sequence variation in the pig genome.

492

493 The cost of high coverage whole-genome sequencing (WGS) precludes it from routine use in breeding  
494 programs. However, it has been suggested that low coverage WGS followed by imputation of  
495 haplotypes may be a cost-effective replacement for SNP arrays in genomic selection [38]. Imputation  
496 from low coverage sequence data to whole genome information has been shown to be highly accurate  
497 [39, 40]. At the 2018 World Congress on Genetics Applied to Livestock Production Aniek Bouwman  
498 reported that in a comparison of Sscrofa10.2 with Sscrofa11.1 (for SSC7 only) for imputation from  
499 600K SNP genotypes to whole genome sequence overall imputation accuracy on SSC7 improved  
500 considerably from 0.81 (1,019,754 variants) to 0.90 (1,129,045 variants) (Aniek Bouwman, pers.  
501 comm). Thus, the improved assembly may not only serve as a better template for discovering genetic  
502 variation but also have advantages for genomic selection, including improved imputation accuracy.

503

504 Advances in the performance of long read sequencing and scaffolding technologies, improvements in  
505 methods for assembling the sequence reads and reductions in costs are enabling the acquisition of  
506 ever more complete genome sequences for multiple species and multiple individuals within a species.  
507 For example, in terms of adding species, the Vertebrate Genomes Project  
508 (<https://vertebrategenomesproject.org/>) aims to generate error-free, near gapless, chromosomal  
509 level, haplotyped phase assemblies of all of the approximately 66,000 vertebrate species and is  
510 currently in its first phase that will see such assemblies created for an exemplar species from all 260  
511 vertebrate orders. At the level of individuals within a species, smarter assembly algorithms and  
512 sequencing strategies are enabling the production of high quality truly haploid genome sequences for  
513 outbred individuals [24]. The establishment of assembled genome sequences for key individuals in the  
514 nucleus populations of the leading pig breeding companies is achievable and potentially affordable.  
515 However, 10-30x genome coverage short read data generated on the Illumina platform and aligned to  
516 a single reference genome is likely to remain the primary approach to sequencing multiple individuals  
517 within farmed animal species such as cattle and pigs [21, 41].

518

519 There are significant challenges in making multiple assembled genome resources useful and  
520 accessible. The current paradigm of presenting a reference genome as a linear representation of a  
521 haploid genome of a single individual is an inadequate reference for a species. As an interim solution  
522 the Ensembl team are annotating multiple assemblies for some species such as mouse  
523 ([https://www.ensembl.org/Mus\\_musculus/Info/Strains](https://www.ensembl.org/Mus_musculus/Info/Strains)) [42]. We have implemented this solution for  
524 pig genomes, including eleven Illumina short-read assemblies [17] in addition to the reference  
525 Sscrofa11.1 and USMARCv1.0 assemblies reported here (Ensembl release 98, September 2019  
526 [https://www.ensembl.org/Sus\\_scrofa/Info/Strains?db=core](https://www.ensembl.org/Sus_scrofa/Info/Strains?db=core)). Although these additional pig genomes  
527 are highly fragmented (Table S6) with contig N50 values from 32 – 102 kbp, the genome annotation  
528 (Table S11) provides a resource to explore pig gene space across thirteen genomes, including six Asian



529 pig genomes. The latter are important given the deep phylogenetic split of about 1 million years  
530 between European and Asian pigs [13].

531

532 The current human genome reference already contains several hundred alternative haplotypes and it  
533 is expected that the single linear reference genome of a species will be replaced with a new model –  
534 the graph genome [43-45]. These paradigm shifts in the representation of genomes present challenges  
535 for current sequence alignment tools and the ‘best-in-genome’ annotations generated thus far. The  
536 generation of high quality annotation remains a labour-intensive and time-consuming enterprise.  
537 Comparisons with the human and mouse reference genome sequences which have benefited from  
538 extensive manual annotation indicate that there is further complexity in the porcine genome as yet  
539 unannotated (Table 3). It is very likely that there are many more transcripts, pseudogenes and non-  
540 coding genes (especially long non-coding genes), to be discovered and annotated on the pig genome  
541 sequence [33]. The more highly continuous pig genome sequences reported here provide an improved  
542 framework against which to discover functional sequences, both coding and regulatory, and sequence  
543 variation. After correction for some contig/scaffold inversions in the USMARCv1.0 assembly, the  
544 overall agreement between the assemblies is high and illustrates that the majority of genomic  
545 variation is at smaller scales of structural variation. However, both assemblies still represent a  
546 composite of the two parental genomes present in the animals, with unknown effects of haplotype  
547 switching on the local accuracy across the assembly.

548

549 Future developments in high quality genome sequences for the domestic pig are likely to include: (i)  
550 gap closure of Sscrofa11.1 to yield an assembly with one contig per (autosomal) chromosome arm  
551 exploiting the isogenic BAC and fosmid clone resource as illustrated here for chromosome 16 and 18;  
552 and (ii) haplotype resolved assemblies of a Meishan and White Composite F1 crossbred pig (i.e. the  
553 offspring of a Meishan sire and a White Composite dam that is approximately  $\frac{1}{2}$  Landrace,  $\frac{1}{4}$  Duroc  
554 and  $\frac{1}{4}$  Yorkshire) currently being sequenced. Beyond this haplotype resolved assemblies for key

555 genotypes in the leading pig breeding company nucleus populations and of miniature pig lines used in  
556 biomedical research can be anticipated in the next 5 years. Unfortunately, some of these genomes  
557 may not be released into the public domain. The first wave of results from the Functional Annotation  
558 of ANimal Genomes (FAANG) initiative [46, 47], are emerging and will add to the richness of pig  
559 genome annotation.

560

561 In conclusion, the new pig reference genome (Sscrofa11.1) described here represents a significantly  
562 enhanced resource for genetics and genomics research and applications for a species of importance  
563 to agriculture and biomedical research.

564

565 **Methods**

566 Additional detailed methods and information on the assemblies and annotation are included in the  
567 Supplementary Materials.

568

569 Preparation of genomic DNA

570 DNA was extracted from Duroc 2-14 cultured fibroblast cells passage 16-18 using the Qiagen Blood &  
571 Cell Culture DNA Maxi Kit. DNA was isolated from lung tissue from barrow MARC1423004 using a salt  
572 extraction method.

573

574 Genome sequencing and assembly

575 Genomic DNAs from the samples described above were used to prepare libraries for sequencing on  
576 Pacific Biosciences RS II sequencer [48]. For Duroc 2-14 DNA P6/C4 chemistry was used, whilst for  
577 MARC1423004 DNA a mix of P6/C4 and earlier P5/C3 chemistry was used.

578

579 Reads from the Duroc 2-14 DNA were assembled into contigs using the Falcon v0.4.0 assembly pipeline  
580 following the standard protocol [26]. Quiver v. 2.3.0 [49] was used to correct the primary and  
581 alternative contigs. Only the primary pseudo-haplotype contigs were used in the assembly. The reads  
582 from the MARC1423004 DNA were assembled into contigs using Celera Assembler v8.3rc2 [30]. The  
583 contigs were scaffolded as described in the results section above.

584

585 Fluorescence *in situ* hybridisation

586 Metaphase preparations were fixed to slides and dehydrated through an ethanol series (2 min each  
587 in 2×SSC, 70%, 85% and 100% ethanol at RT). Probes were diluted in a formamide buffer (Cytocell)  
588 with Porcine Hybloc (Insight Biotech) and applied to the metaphase preparations on a 37°C hotplate  
589 before sealing with rubber cement. Probe and target DNA were simultaneously denatured for 2 mins  
590 on a 75°C hotplate prior to hybridisation in a humidified chamber at 37°C for 16 h. Slides were washed

591 post hybridisation in 0.4x SSC at 72°C for 2 mins followed by 2x SSC/0.05% Tween 20 at RT for 30 secs,  
592 and then counterstained using VECTASHIELD anti-fade medium with DAPI (Vector Labs). Images were  
593 captured using an Olympus BX61 epifluorescence microscope with cooled CCD camera and  
594 SmartCapture (Digital Scientific UK) system.

595

#### 596 Analysis of repetitive sequences, including telomeres and centromeres

597 Repeats were identified using RepeatMasker (v.4.0.7) (<http://www.repeatmasker.org>) with a  
598 combined repeat database including Dfam (v.20170127) [50] and RepBase (v.20170127) [51].  
599 RepeatMasker was run with “sensitive” (-s) setting using *sus scrofa* as the query species (-- species  
600 “*sus scrofa*”). Repeats which showed greater than 40% sequence divergence or were shorter than 70%  
601 of the expected sequence length were filtered out from subsequent analyses. The presence of  
602 potentially novel repeats was assessed by RepeatMasker using the novel repeat library generated by  
603 RepeatModeler (v.1.0.11) (<http://www.repeatmasker.org>).

604

605 Telomeres were identified by running Tandem Repeat Finder (TRF) [52] with default parameters apart  
606 from Mismatch (5) and Minscore (40). The identified repeat sequences were then searched for the  
607 occurrence of five identical, consecutive units of the TTAGGG vertebrate motif or its reverse  
608 complement and total occurrences of this motif was counted within the tandem repeat. Regions which  
609 contained at least 200 identical hexamer units, were >2kb of length and had a hexamer density of >0.5  
610 were retained as potential telomeres.

611

612 Centromeres were predicted using the following strategy. First, the RepeatMasker output, both  
613 default and novel, was searched for centromeric repeat occurrences. Second, the assemblies were  
614 searched for known, experimentally verified, centromere specific repeats [53, 54] in the *Sscrofa11.1*  
615 genome. Then the three sets of repeat annotations were merged together with BEDTools [55] (median  
616 and mean length: 786 bp and 5775 bp, respectively) and putative centromeric regions closer than

617 500 bp were collapsed into longer super-regions. Regions which were >5kb were retained as potential  
618 centromeric sites.

619

#### 620 Long read RNA sequencing (Iso-Seq)

621 The following tissues were harvested from MARC1423004 at age 48 days: brain (BioSamples:  
622 SAMN05952594), diaphragm (SAMN05952614), hypothalamus (SAMN05952595), liver  
623 (SAMN05952612), small intestine (SAMN05952615), skeletal muscle – *longissimus dorsi*  
624 (SAMN05952593), spleen (SAMN05952596), pituitary (SAMN05952626) and thymus  
625 (SAMN05952613). Total RNA from each of these tissues was extracted using Trizol reagent  
626 (ThermoFisher Scientific) and the provided protocol. Briefly, approximately 100 mg of tissue was  
627 ground in a mortar and pestle cooled with liquid nitrogen, and the powder was transferred to a tube  
628 with 1 ml of Trizol reagent added and mixed by vortexing. After 5 minutes at room temperature,  
629 0.2 mL of chloroform was added and the mixture was shaken for 15 seconds and left to stand another  
630 3 minutes at room temperature. The tube was centrifuged at 12,000 x g for 15 minutes at 4°C. The  
631 RNA was precipitated from the aqueous phase with 0.5 mL of isopropanol. The RNA was further  
632 purified with extended DNase I digestion to remove potential DNA contamination. The RNA quality  
633 was assessed with a Fragment Analyzer (Advanced Analytical Technologies Inc., IA). Only RNA samples  
634 of RQN above 7.0 were used for library construction. PacBio IsoSeq libraries were constructed per the  
635 PacBio IsoSeq protocol. Briefly, starting with 3 µg of total RNA, cDNA was synthesized by using  
636 SMARTer PCR cDNA Synthesis Kit (Clontech, CA) according to the IsoSeq protocol (Pacific Biosciences,  
637 CA). Then the cDNA was amplified using KAPA HiFi DNA Polymerase (KAPA Biotechnologies) for 10 or  
638 12 cycles followed by purification and size selection into 4 fractions: 0.8-2 kb, 2-3 kb, 3-5 kb and >5 kb.  
639 The fragment size distribution was validated on a Fragment Analyzer (Advanced Analytical  
640 Technologies Inc, IA) and quantified on a DS-11 FX fluorometer (DeNovix, DE). After a second round  
641 of large scale PCR amplification and end repair, SMRT bell adapters were separately ligated to the  
642 cDNA fragments. Each size fraction was sequenced on 4 or 5 SMRT Cells v3 using P6-C4 chemistry and

643 6 hour movies on a PacBio RS II sequencer (Pacific Bioscience, CA). Short read RNA-Seq libraries were  
644 also prepared for all nine tissue using TruSeq stranded mRNA LT kits and supplied protocol (Illumina,  
645 CA), and sequenced on a NextSeq500 platform using v2 sequencing chemistry to generate 2 x 75 bp  
646 paired-end reads.

647

648 The Read of Insert (ROI) were determined by using *consensustools.sh* in the SMRT-Analysis pipeline  
649 v2.0, with reads which were shorter than 300 bp and whose predicted accuracy was lower than 75%  
650 removed. Full-length, non-concatemer (FLNC) reads were identified by running the *classify.py*  
651 command. The cDNA primer sequences as well as the poly(A) tails were trimmed prior to further  
652 analysis. Paired-end Illumina RNA-Seq reads from each tissue sample were trimmed to remove the  
653 adaptor sequences and low-quality bases using Trimmomatic (v0.32) [56] with explicit option settings:  
654 *ILLUMINACLIP:adapters.fa:2:30:10:1:true LEADING:3 TRAILING:3 SLIDINGWINDOW:4:20 LEADING:3*  
655 *TRAILING:3 MINLEN:25*, and overlapping paired-end reads were merged using the PEAR software  
656 (v0.9.6) [57]. Subsequently, the merged and unmerged RNA-Seq reads from the same tissue samples  
657 were *in silico* normalized in a mode for single-end reads by using a Trinity (v2.1.1) [58] utility,  
658 *insilico\_read\_normalization.pl*, with the following settings: *--max\_cov 50 --max\_pct\_stdev 100 --*  
659 *single*. Errors in the full-length, non-concatemer reads were corrected with the preprocessed RNA-Seq  
660 reads from the same tissue samples by using *proofread* (v2.12) [59]. Untrimmed sequences with at  
661 least some regions of high accuracy in the *.trimmed.fq* files were extracted based on sequence IDs in  
662 *.untrimmed.fa* files to balance off the contiguity and accuracy of the final reads.

663

#### 664 Short read RNA sequencing (RNA-Seq)

665 In addition to the Illumina short read RNA-seq data generated from MARC1423004 and used to correct  
666 the Iso-Seq data (see above), Illumina short read RNA-seq data (PRJEB19386) were also generated  
667 from a range of tissues from four juvenile Duroc pigs (two male, two female) and used for annotation  
668 as described below. Extensive metadata with links to the protocols for sample collection and

669 processing are linked to the BioSample entries under the Study Accession PRJEB19386. The tissues  
670 sampled are listed in Table S10. Sequencing libraries were prepared using a ribodepletion TruSeq  
671 stranded RNA protocol and 150 bp paired end sequences generated on the Illumina HiSeq 2500  
672 platform in rapid mode.

673

#### 674 Annotation

675 The assembled genomes were annotated using the Ensembl pipelines [36] as detailed in the  
676 Supplementary materials. The Iso-Seq and RNA-Seq data described above were used to build gene  
677 models.

678

#### 679 Mapping SNP chip probes

680 The probes from four commercial SNP chips were mapped to the Sscrofa10.2, Sscrofa11.1 and  
681 USMARCv1.0 assemblies using BWA MEM [60] and a wrapper script  
682 ([https://github.com/njdbickhart/perl\\_toolchain/blob/master/assembly\\_scripts/alignAndOrderSnPr  
684 obes.pl](https://github.com/njdbickhart/perl_toolchain/blob/master/assembly_scripts/alignAndOrderSnPr<br/>683 obes.pl)). Probe sequence was derived from the marker manifest files that are available on the provider  
685 websites: Illumina PorcineSNP60 ([https://emea.illumina.com/products/by-type/microarray-  
687 kits/porcine-snp60.html](https://emea.illumina.com/products/by-type/microarray-<br/>686 kits/porcine-snp60.html)) [1]; Affymetrix Axiom™ Porcine Genotyping Array  
688 (<https://www.thermofisher.com/order/catalog/product/550588>); Gene Seek Genomic Profiler  
689 Porcine – HD beadChip (<http://genomics.neogen.com/uk/ggp-porcine>); Gene Seek Genomic Profiler  
690 Porcine v2– LD Chip (<http://genomics.neogen.com/uk/ggp-porcine>). In order to retain marker  
691 manifest coordinate information, each probe marker name was annotated with the chromosome and  
692 position of the marker’s variant site from the manifest file. All mapping coordinates were tabulated  
693 into a single file, and were sorted by the chromosome and position of the manifest marker site. In  
694 order to derive and compare relative marker rank order, a custom Perl script  
695 ([https://github.com/njdbickhart/perl\\_toolchain/blob/master/assembly\\_scripts/pigGenomeSNPSortR](https://github.com/njdbickhart/perl_toolchain/blob/master/assembly_scripts/pigGenomeSNPSortR)

694 [ankOrder.pl](#)) was used to sort and number markers based on their mapping locations in each  
695 assembly.

696



697 **Supplementary materials**

698 Supplementary materials for this article include:

699 Supplementary Methods and Information

700 Table S1. Pacific Biosciences read statistics.

701 Table S2. Predicted telomeres.

702 Table S3. Predicted centromeres.

703 Table S4. Assigning scaffolds to chromosomes.

704 Table S5 Alignment of Radiation Hybrid maps and genome assemblies.

705 Table S6. Assemblytics comparisons, assembly statistics.

706 Table S7. BUSCO results.

707 Table S8. Annotation statistics. (Ensembl-NCBI comparison)

708 Table S9. Commercial SNP chip probes.

709 Table S10. Tissue samples.

710 Table S11. Ensembl annotation statistics for 13 pig genome assemblies

711 Figure S1. Predicted telomeres.

712 Figure S2. Predicted centromeres.

713 Figure S3. Fluorescent *in situ* hybridisation assignments.

714 Fig. S4. Improvement in local order and orientation and reduction in redundancy.

715 Fig. S5. Assembly comparisons in gEVAL (SSC15).

716 Fig. S6. Assembly comparisons in gEVAL (SSC5).

717 Fig. S7. Assembly comparisons in gEVAL (SSC18).

718 Fig. S8. Order and orientation of SSC18 assemblies.

719 Fig. S9. Order and orientation of SSC7 assemblies.

720 Fig. S10. Order and orientation of SSC8 assemblies.

721 Fig. S11. Assembly alignments.

722 Figure S12. Assemblytics results.

- 723 Figure S13. Counts of repetitive elements in four pig assemblies.
- 724 Figure S14. Average mapped length of repetitive elements in four pig genomes.
- 725 Figure S15. Assembly SNP rank concordance versus reported chromosomal location.
- 726

727 **References**

- 728 1. Ramos AM, Crooijmans RPMA, Affara NA, Amaral AJ, Archibald AL, Beever JE, et al. Design of a  
729 high density SNP genotyping assay in the pig using SNPs identified and characterized by next  
730 generation sequencing technology. *PLoS One* 2009;4:e6524.
- 731 2. Hu ZL, Park CA, ReecyJM, Developmental progress and current status of the Animal QTLdb. *Nucleic*  
732 *Acids Res.* 2016;44:D827–33.
- 733 3. Meuwissen T, Hayes, B, Goddard M, Accelerating Improvement of Livestock with Genomic  
734 Selection. *Annu. Rev. Anim. Biosci.* 2013;1:221–37.
- 735 4. Christensen OF, Madsen P, Nielsen B, Ostersen T, Su G, Single-step methods for genomic  
736 evaluation in pigs. *Animal* 2012;6:1565–71.
- 737 5. Cleveland M, Hickey JM, Practical implementation of cost-effective genomic selection in  
738 commercial pig breeding using imputation. *J. Anim. Sci.* 2013;91:3583–92.
- 739 6. Vamathevan JJ, Hall MD, Hasan S, Woollard PM, Xu M, Yang Y, et al. Minipig and beagle animal  
740 model genomes aid species selection in pharmaceutical discovery and development. *Toxicol. Appl.*  
741 *Pharmacol.* 2013;270:149–57.
- 742 7. Klymiuk N, Seeliger F, Bohlooly M, Blutke A, Rudmann DG, Wolf E, Tailored Pig Models for  
743 Preclinical Efficacy and Safety Testing of Targeted Therapies. *Toxicol. Pathol.* 2016;44:346–57.
- 744 8. Wells KD, Prather RS, Genome-editing technologies to improve research, reproduction, and  
745 production in pigs. *Mol. Reprod. Dev.* 2017;84:1012–7.
- 746 9. Servin B, Faraut T, Iannuccelli N, Zelenika D, Milan D, High-resolution autosomal radiation hybrid  
747 maps of the pig genome and their contribution to the genome sequence assembly. *BMC Genomics*  
748 2012;13:585.
- 749 10. Tortereau F, Servin B, Frantz L, Megens HJ, Milan D, Rohrer G, et al. A high density recombination  
750 map of the pig reveals a correlation between sex-specific recombination and GC content. *BMC*  
751 *Genomics* 2012;13:586.

- 752 11. Yerle M, Lahbib-Mansais Y, Mellink C, Goureau A, Pinton P, Echard G, et al. The PiGMaP  
753 consortium cytogenetic map of the domestic pig (*Sus scrofa domestica*). *Mamm. Genome*  
754 1995;6:176–86.
- 755 12. Humphray SJ, Scott CE, Clark R, Marron B, Bender C, Camm N, et al. A high utility integrated map  
756 of the pig genome. *Genome Biol.* 2017;8:R139.
- 757 13. Groenen MAM, Archibald AL, Uenishi H, Tuggle CK, Takeuchi Y, Rothschild MF, et al. Analyses of  
758 pig genomes provide insight into porcine demography and evolution. *Nature* 2012;491:393–8.
- 759 14. Warr A, Robert C, Hume D, Archibald AL, Deeb N, Watson M. Identification of Low-Confidence  
760 Regions in the Pig Reference Genome (*Sscrofa* 10.2). *Front. Genet.* 2015;6:338.
- 761 15. O’Connor RE, Fonseka G, Frodsham R, Archibald AL, Lawrie M, Walling GA et al. Isolation of  
762 subtelomeric sequences of porcine chromosomes for translocation screening reveals errors in the  
763 pig genome assembly. *Anim. Genet.* 2017;48:395–403.
- 764 16. Dawson HD, Chen C, Gaynor B, Shao J, Urban Jr. JF. The porcine translational research database:  
765 a manually curated, genomics and proteomics-based research resource. *BMC Genomics*  
766 2017;18:643.
- 767 17. Li M, Chen L, Tian S, Lin Y, Tang Q, Zhou X, et al. Comprehensive variation discovery and recovery  
768 of missing sequence in the pig genome using multiple de novo assemblies. *Genome Res.*  
769 2017;27:865–74.
- 770 18. Schook LB, Beever JE, Rogers J, Humphray S, Archibald A, Chardon P, et al. Swine Genome  
771 Sequencing Consortium (SGSC): A strategic roadmap for sequencing the pig genome. *Comparative*  
772 *and Functional Genomics* 2005;6:251–5.
- 773 19. Robert C, Fuentes-Utrilla P, Troup K, Loecherbach J, Turner F, Talbot R, et al. Design and  
774 development of exome capture sequencing for the domestic pig (*Sus scrofa*). *BMC Genomics*  
775 2014;15:550.
- 776 20. Skinner BM, Sargent CA, Churcher C, Hunt T, Herrero J, Loveland JE, et al. The pig X and Y  
777 Chromosomes: structure, sequence, and evolution. *Genome Res.* 2016;26:130–9.

- 778 21. Frantz LAF, Schraiber JG, Madsen O, Megens HJ, Cagan A, Bosse M, et al. Evidence of long-term  
779 gene flow and selection during domestication from analyses of Eurasian wild and domestic pig  
780 genomes. *Nat. Genet.* 2015;47:1141-8.
- 781 22. Groenen MAM. A decade of pig genome sequencing: a window on pig domestication and  
782 evolution. *Genet. Sel. Evol.* 2016;48:23.
- 783 23. van Dijk EL, Jaszczyszyn Y, Naquin D, Thermes C. The Third Revolution in Sequencing Technology.  
784 *Trends in Genetics* 2018;34:666-81.
- 785 24. Koren S, Rhie A, Walenz BP, Diltney AT, Bickhart DM, Kingan SB, et al. De novo assembly of  
786 haplotype-resolved genomes with trio binning. *Nat. Biotechnol.* 2018;36:1174-82.
- 787 25. Putnam NH, O'Connell BL, Stites JC, Rice BJ, Blanchette M, Calef R, et al. Chromosome-scale  
788 shotgun assembly using an in vitro method for long-range linkage. *Genome Res.* 2016;26:342–50.
- 789 26. Chin CS, Peluso P, Sedlazeck FJ, Nattestad M, Concepcion GT, Clum A, et al. Phased diploid genome  
790 assembly with single-molecule real-time sequencing. *Nat. Methods* 2016;13:1050–4.
- 791 27. Kurtz S, Phillippy A, Delcher AL, Smoot M, Shumway M, Antonescu C, et al. Versatile and open  
792 software for comparing large genomes. *Genome Biol.* 2004;5:R12.
- 793 28. English AC, Richards S, Han Y, Wang M, Lee V, Qu J, et al. Mind the Gap: Upgrading Genomes with  
794 Pacific Biosciences RS Long-Read Sequencing Technology. *PLoS One* 2012;7:e47768.
- 795 29. Chow W, Brugger K, Caccamo M, Sealy I, Torrance J, Howe K. gEVAL-a web-based browser for  
796 evaluating genome assemblies. *Bioinformatics* 2016;32:2508–10.
- 797 30. Berlin K, Koren S, Chin CS, Drake JP, Landolin JM, Phillippy AM. Assembling large genomes with  
798 single-molecule sequencing and locality-sensitive hashing. *Nat. Biotechnol.* 2015;33:623–30.
- 799 31. Nattestad M, Schatz MC. Assemblytics: A web analytics tool for the detection of variants from an  
800 assembly. *Bioinformatics* 2016;32:3021-3.
- 801 32. Simão FA, Waterhouse RM, Ioannidis P, Kriventseva EV, Zdobnov EM. BUSCO: Assessing genome  
802 assembly and annotation completeness with single-copy orthologs. *Bioinformatics* 2015;31:3210–  
803 2.

- 804 33. Beiki H, Liu H, Manchanda N, Nonneman D, Smith TPL, Reecy JM et al. Improved annotation of the  
805 domestic pig genome through integration of Iso-Seq and RNA-seq data. *BMC Genomics*  
806 2019;20:344.
- 807 34. Long Y, Su Y, Ai H, Zhang Z, Yang B, Ruan G, et al. A genome-wide association study of copy number  
808 variations with umbilical hernia in swine. *Anim. Genet.* 2016;47:298–305.
- 809 35. Meyers SN, Rogatcheva MB, Larkin DM, Yerle M, Milan D, Hawken RJ, et al. Piggy-BACing the  
810 human genome: II. A high-resolution, physically anchored, comparative map of the porcine  
811 autosomes. *Genomics* 2005;86:739-52.
- 812 36. Cunningham F, Achuthan P, Akanni W, Allen J, Amode MR, Armean IM, et al. Ensembl 2019.  
813 *Nucleic Acids Res.* 2019;47(D1):D745-51.
- 814 37. Utsunomiya ATH, Santos DJ, Boison SA, Utsunomiya YT, Milanese M, Bickhart DM, et al. Revealing  
815 misassembled segments in the bovine reference genome by high resolution linkage disequilibrium  
816 scan. *BMC Genomics* 2016;17:705.
- 817 38. Hickey JM. Sequencing millions of animals for genomic selection 2.0. *Journal of Animal Breeding*  
818 *and Genetics* 2013;130:331-2.
- 819 39. Le SQ, Durbin R. SNP detection and genotyping from low-coverage sequencing data on multiple  
820 diploid samples. *Genome Res.* 2011;21:952-60.
- 821 40. Li Y, Sidore C, Kang HM, Boehnke M, Abecasis GR. Low-coverage sequencing: Implications for  
822 design of complex trait association studies. *Genome Res.* 2011;21:940-51.
- 823 41. Daetwyler HD, Capitan A, Pausch H, Stottthard P, van Binsbergen R, Brøndum RF, et al. Whole-  
824 genome sequencing of 234 bulls facilitates mapping of monogenic and complex traits in cattle.  
825 *Nat. Genet.* 2014;46:858-65.
- 826 42. Lilue J, Doran AG, Fiddes IT, Abrudan M, Armstrong J, Bennett R, et al. Sixteen diverse laboratory  
827 mouse reference genomes define strain-specific haplotypes and novel functional loci. *Nat. Genet.*  
828 2018;50:1574-83.

- 829 43. Baier U, Beller T, Ohlebusch E. Graphical pan-genome analysis with compressed suffix trees and  
830 the Burrows-Wheeler transform. *Bioinformatics* 2015;32:497–504.
- 831 44. Chaisson MJP, Wilson RK, Eichler EE. Genetic variation and the de novo assembly of human  
832 genomes. *Nat. Rev. Genet.* 2015;16:627–40.
- 833 45. Garrison E, Sirén J, Novak AM, Hickey G, Eizenga JM, Dawson ET, et al. Variation graph toolkit  
834 improves read mapping by representing genetic variation in the reference. *Nature Biotechnology*  
835 2018;36:875-9.
- 836 46. Andersson L, Archibald AL, Bottema CD, Brauning R, Burgess SC, Burt DW, et al. Coordinated  
837 international action to accelerate genome-to-phenome with FAANG, the Functional Annotation  
838 of Animal Genomes project. *Genome Biol.* 2015;16:57.
- 839 47. Foissac S, Djebali S, Munyard K, Vialaneix N, Rau A, Muret K, et al. Livestock genome annotation:  
840 transcriptome and chromatin structure profiling in cattle, goat and pig. *bioRxiv* (2018).  
841 doi:<https://doi.org/10.1101/316091>
- 842 48. Pendleton M, Sebra R, Pang AA, Ummat A, Franzen O, Rausch T, et al. Assembly and diploid  
843 architecture of an individual human genome via single-molecule technologies. *Nat. Methods*  
844 2015;12:780–6.
- 845 49. Chin CS, Alexander DH, Marks P, Klammer AA, Drake J, Heiner C, et al. Nonhybrid, finished  
846 microbial genome assemblies from long-read SMRT sequencing data. *Nat. Methods* 2013;10:563-  
847 9.
- 848 50. Hubley R, Finn RD, Clements J, Eddy SR, Jones TA, Bao W, et al. The Dfam database of repetitive  
849 DNA families. *Nucleic Acids Res.* 2016;44:D81–9.
- 850 51. Bao W, Kojima KK, Kohany O. Repbase Update, a database of repetitive elements in eukaryotic  
851 genomes. *Mobile DNA* 6(1). doi: 10.1186/s13100-015-0041-9. (2015).
- 852 52. Benson G. Tandem repeats finder: A program to analyze DNA sequences. *Nucleic Acids Res.*  
853 1999;27:573–80.

- 854 53. Miller JR, Hindkjær J, Thomsen PD. A chromosomal basis for the differential organization of a  
855 porcine centromere-specific repeat. *Cytogenet. Cell Genet.* 1993;62:37–41.
- 856 54. Riquet J, Mulsant P, Yerle M, Cristobal-Gaudy MS, Le Tissier P, Milan D, et al. Sequence analysis  
857 and genetic mapping of porcine chromosome 11 centromeric S0048 marker. *Cytogenet. Cell*  
858 *Genet.* 1996;74:127-32.
- 859 55. Quinlan AR, Hall IM. BEDTools: A flexible suite of utilities for comparing genomic features,  
860 *Bioinformatics* 2010;26:841–2.
- 861 56. Bolger AM, Lohse M, Usadel B. Trimmomatic: A flexible trimmer for Illumina sequence data.  
862 *Bioinformatics* 2014;30:2114–20.
- 863 57. Zhang J, Kobert K, Flouri T, Stamatakis A. PEAR: A fast and accurate Illumina Paired-End read  
864 mergeR. *Bioinformatics* 2014;30:614–20.
- 865 58. Grabherr MG, Haas BJ, Yassour M, Levin JZ, Thompson DA, Amit I, et al. Full-length transcriptome  
866 assembly from RNA-Seq data without a reference genome. *Nat Biotechnol* 2011;29:644–52.
- 867 59. Hackl T, Hedrich R, Schultz J, Förster F. Proovread: Large-scale high-accuracy PacBio correction  
868 through iterative short read consensus. *Bioinformatics* 2014;30:3004–11.
- 869 60. Li H, Durbin R. Fast and accurate short read alignment with Burrows-Wheeler transform.  
870 *Bioinformatics* 2009;25:1754-60.
- 871 61. Robinson JT, Thorvaldsdóttir H, Winckler W, Guttman M, Lander ES, Getz G, et al. Integrative  
872 genomics viewer. *Nat. Biotechnol.* 2011;29:24–6.
- 873 62. Koren S, Walenz BP, Berlin K, Miller JR, Bergman NH, Phillippy AM. Canu: Scalable and accurate  
874 long-read assembly via adaptive  $k$ -mer weighting and repeat separation. *Genome Res.*  
875 2017;27:722–36.
- 876 63. Li H. Aligning sequence reads, clone sequences and assembly contigs with BWA-MEM.  
877 *ArXiv:1303.3997v1 [q-bio.GN]* (2013).



- 878 64. Walker BJ, Abeel T, Shea T, Priest M, Abouelliel A, Sakthikumar S, et al. Pilon: An integrated tool  
879 for comprehensive microbial variant detection and genome assembly improvement. *PLoS ONE*  
880 2014;9:e112963.
- 881 65. Anderson SI, Lopez-Corrales NL, Gorick B, Archibald AL. A large-fragment porcine genomic library  
882 resource in a BAC vector. *Mammalian Genome* 2000;11:811–4.
- 883 66. Morgulis A, Gertz EM, Schäffer AA, Agarwala R. A Fast and Symmetric DUST Implementation to  
884 Mask Low-Complexity DNA Sequences. *J Comp Biol* 2006;13:1028-40.
- 885 67. Down TA, Hubbard TJP. Computational detection and location of transcription start sites in  
886 mammalian genomic DNA. *Genome Res* 2002;12:458–61.
- 887 68. Lowe TM, Eddy SR. TRNAscan-SE: A program for improved detection of transfer RNA genes in  
888 genomic sequence. *Nucleic Acids Res* 1996;25:955–64.
- 889 69. Burge C, Karlin S. Prediction of complete gene structures in human genomic DNA. *J Mol Biol*  
890 1997;268:78–94.
- 891 70. O’Leary NA, Wright MW, Brister JR, Ciuffo S, Haddad D, McVeigh R, et al. Reference sequence  
892 (RefSeq) database at NCBI: current status, taxonomic expansion, and functional annotation.  
893 *Nucleic Acids Res* 2016;44:D733-45.
- 894 71. Slater GSC, Birney E. Automated generation of heuristics for biological sequence comparison. *BMC*  
895 *Bioinformatics* 2005;6:31.
- 896 72. Frankish A, Diekhans M, Ferreira AM, Johnson R, Jungreis I, Loveland J, et al. GENCODE reference  
897 annotation for the human and mouse genomes. *Nucleic Acids Res* 2019;47:D766-73.
- 898 73. Li H. Minimap2: pairwise alignment for nucleotide sequences. *Bioinformatics* 2018;34:3094-3100.
- 899 74. She R, Chu JS, Uyar B, Wang J, Wang K, Chen N. genBlastG: Using BLAST searches to build  
900 homologous gene models. *Bioinformatics* 2011;27:2141–3.
- 901 75. Lefranc MP, Giudicelli V, Duroux P, Jabado-Michaloud J, Folch G, Aouinti S, et al. IMGT®, the  
902 international ImMunoGeneTics information system® 25 years on. *Nucleic Acids Res*  
903 2015;43:D413–22.

- 904 76. Lewis SE, Searle SMJ, Harris N, Gibson M, Iyer V, Richter J, et al. Apollo: a sequence annotation  
905 editor. *Genome Biol* 2002;3:research0082.1.
- 906 77. Griffiths-Jones S, Bateman A, Marshall M, Khanna A, Eddy SR. Rfam: An RNA family database',  
907 *Nucleic Acids Res* 2003;31:439–41.
- 908 78. Griffiths-Jones S, Grocock RJ, van Dongen S, Bateman A, Enright AJ. miRBase: microRNA  
909 sequences, targets and gene nomenclature. *Nucleic Acids Res* 2006;34:D140–4.
- 910 79. Lorenz R, Bernhart SH, Höner Zu Siederdisen C, Tafer H, Flamm C, Stadler PF, et al. ViennaRNA  
911 Package 2.0. *Algorithms Mol Biol* 2011;6:26.
- 912 80. Nawrocki EP, Eddy SR. Infernal 1.1: 100-fold faster RNA homology searches. *Bioinformatics*  
913 2013;29:2933-5.
- 914 81. Papatheodorou I, Fonesca NA, Keays M, Tang YA, Barrera E, Bazant W, et al. Expression Atlas:  
915 Gene and protein expression across multiple studies and organisms. *Nucleic Acids Res*  
916 2018;46:D246-51.
- 917

918 **Acknowledgements**

919 We are grateful to Chris Tyler-Smith (Wellcome Trust Sanger Institute) for sharing the SSCY sequence  
920 data for Sscrofa11.1. **Funding:** We are grateful for funding support from the i) Biotechnology and  
921 Biological Sciences Research Council (Institute Strategic Programme grants: BBS/E/D/20211550,  
922 BBS/E/D/10002070; and response mode grants: BB/F021372/1, BB/M011461/1, BB/M011615/1,  
923 BB/M01844X/1); ii) European Union through the Seventh Framework Programme Quantomics  
924 (KBBE222664); iii) University of Cambridge, Department of Pathology; iv) Wellcome Trust:  
925 WT108749/Z/15/Z; v) European Molecular Biology Laboratory; and vi) the Roslin Foundation. In  
926 addition HL and HB were supported by USDA NRSP-8 Swine Genome Coordination funding; SK and  
927 AMP were supported by the Intramural Research Program of the National Human Genome Research  
928 Institute, US National Institutes of Health; D.M.B was supported by USDA CRIS projects 8042-31000-  
929 001-00-D and 5090-31000-026-00-D. B.D.R was supported by USDA CRIS project 8042-31000-001-00-  
930 D. T.P.L.S. was supported by USDA CRIS project 3040-31000-100-00-D. This work used the  
931 computational resources of the NIH HPC Biowulf cluster (<https://hpc.nih.gov>); and the Iowa State  
932 University Lightning3 and ResearchIT clusters. The Ceres cluster (part of the USDA SCInet Initiative)  
933 was used to analyse part of this dataset.

934

935 **Author contributions**

936 A.L.A. and T.P.L.S. conceived, coordinated and managed the project; A.L.A., P.F., D.A.H., T.P.L.S. M.W.  
937 supervised staff and students performing the analyses; D.J.N., L.R., L.B.S., T.P.L.S. provided biological  
938 resources; R.H., K.S.K. and T.P.L.S. generated PacBio sequence data; H.A.F., T.P.L.S. and R.T. generated  
939 Illumina WGS and RNA-Seq data; N.A.A., C.A.S., B.M.S. provided SSCY assemblies; D.J.N, and T.P.L.S.  
940 generated Iso-Seq data; G.H., R.H., S.K., A.M.P., A.S.S, A.W. generated sequence assemblies; A.W.  
941 polished and quality checked Sscrofa11.1; W.C., G.H., K.H., S.K., B.D.R., A.S.S., S.G.S., E.T. performed  
942 quality checks on the sequence assemblies; R.E.O’C. and D.K.G. performed cytogenetics analyses; L.E.  
943 analysed repeat sequences; H.B., H.L., N.M., C.K.T. analysed Iso-Seq data; D.M.B. and G.A.R. analysed

944 sequence variants; B.A., K.B., C.G.G., T.H., O.I., F.J.M. annotated the assembled genome sequences;  
945 A.W. and A.L.A drafted the manuscript; all authors read and approved the final manuscript.

946

947 **Competing interests**

948 The authors declare that they have no competing interests.

949

950 **Data and materials availability**

951 The genome assemblies are deposited at NCBI under accession numbers GCA\_000003025  
952 (Scrofa11.1) and GCA\_002844635.1 (USMARCv1.0). The associated BioSample accession numbers are  
953 SAMN02953785 and SAMN07325927, respectively. Iso-seq and RNA-Seq data used for analysis and  
954 annotation are available under accession numbers PRJNA351265 and PRJEB19386, respectively.

955

956

957 **Figure 1. Assemblies and radiation hybrid map alignments.** Plots illustrating co-linearity between radiation hybrid map and a) Sscrofa11.1 and b) USMARCv1.0  
958 assemblies (autosomes only).

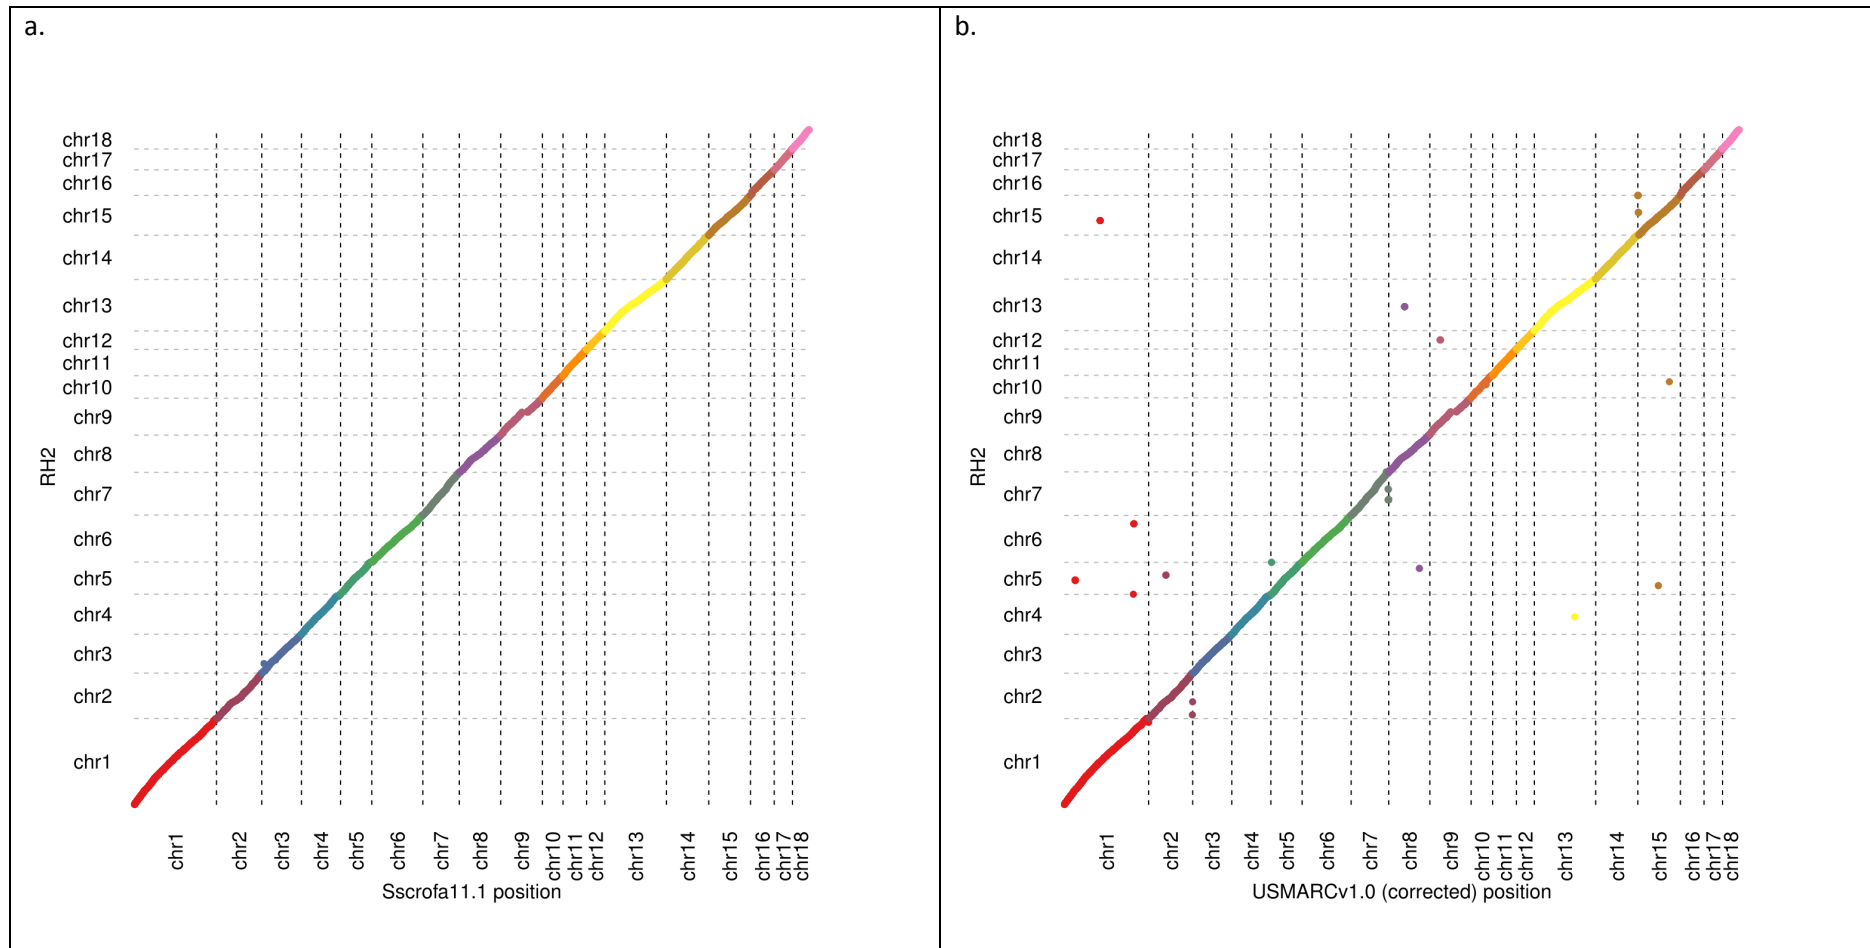

960 **Figure 2. Visualisation of improvements in assembly contiguity.** Graphical visualisation of contigs  
961 for Sscrofa11 (top) and Sscrofa10.2 (bottom) as alternating dark and light grey bars.

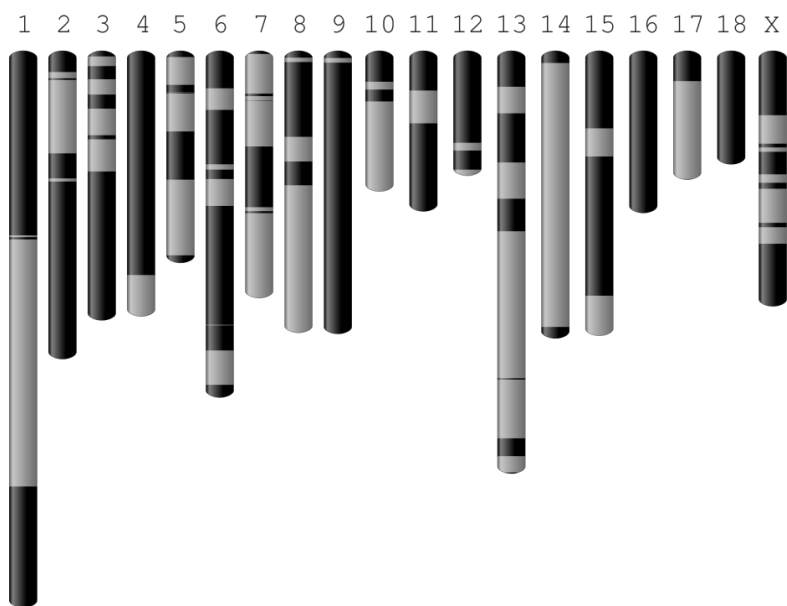

962

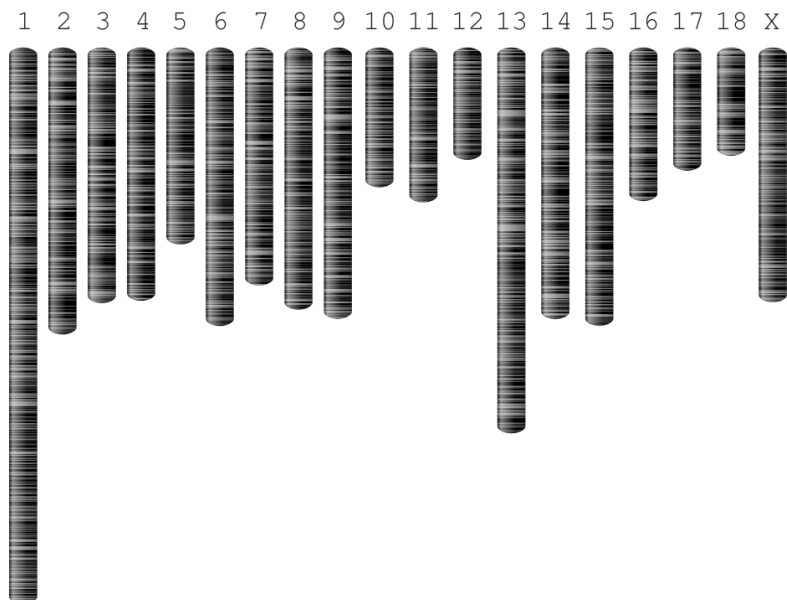

963

964

965

966 **Table 1. Assembly statistics.** Summary statistics for assembled pig genome sequences and comparison with current human reference genome. (source: NCBI,  
 967 <https://www.ncbi.nlm.nih.gov/assembly/>; \* includes mitochondrial genome.

| Assembly                     | Sscrofa10.2   | Sscrofa11     | Sscrofa11.1   | USMARCv1.0    | GRCh38.p12    |
|------------------------------|---------------|---------------|---------------|---------------|---------------|
| Total sequence length        | 2,808,525,991 | 2,456,768,445 | 2,501,912,388 | 2,755,438,182 | 3,099,706,404 |
| Total ungapped length        | 2,519,152,092 | 2,454,899,091 | 2,472,047,747 | 2,623,130,238 | 2,948,583,725 |
| Number of scaffolds          | 9,906         | 626           | 706           | 14,157        | 472           |
| Gaps between scaffolds       | 5,323         | 24            | 93            | 0             | 349           |
| Number of unplaced scaffolds | 4,562         | 583           | 583           | 14,136        | 126           |
| Scaffold N50                 | 576,008       | 88,231,837    | 88,231,837    | 131,458,098   | 67,794,873    |
| Scaffold L50                 | 1,303         | 9             | 9             | 9             | 16            |
| Number of unspanned gaps     | 5,323         | 24            | 93            | 0             | 349           |
| Number of spanned gaps       | 233,116       | 79            | 413           | 661           | 526           |
| Number of contigs            | 243,021       | 705           | 1,118         | 14,818        | 998           |
| Contig N50                   | 69,503        | 48,231,277    | 48,231,277    | 6,372,407     | 57,879,411    |
| Contig L50                   | 8,632         | 15            | 15            | 104           | 18            |
| Number of chromosomes*       | *21           | 19            | *21           | *21           | 24            |

968

969

970 **Table 2. Summary of quality statistics for SSC1-18, SSCX.** Quality measures and terms as defined [14].

971

|                                                         | Mean<br>(Sscrofa11) | Std<br>(Sscrofa11) | Bases<br>(Sscrofa11) | % genome<br>(Sscrofa11) | % genome<br>(Sscrofa10.2) |
|---------------------------------------------------------|---------------------|--------------------|----------------------|-------------------------|---------------------------|
| High Coverage                                           | 50                  | 7                  | 119,341,205          | 4.9                     | 2.6                       |
| Low Coverage (LC)                                       | 50                  | 7                  | 185,385,536          | 7.5                     | 26.6                      |
| % Properly paired                                       | 86                  | 6.8                | 95,508,007           | 3.9                     | 4.95                      |
| % High inserts                                          | 0.3                 | 1.6                | 40,835,320           | 1.72                    | 1.52                      |
| % Low inserts                                           | 8.2                 | 4.3                | 114,793,298          | 4.7                     | 3.99                      |
| Low quality (LQ)                                        | -                   | -                  | 284,838,040          | 11.6                    | 13.85                     |
| Total LQLC                                              | -                   | -                  | 399,927,747          | 16.3                    | 33.07                     |
| LQLC windows that do not intersect RepeatMasker regions |                     |                    | 39,918,551           | 1.6                     |                           |

972

973



974 **Table 3. Annotation statistics.** Ensembl annotation of pig (Sscrofa10.2, Sscrofa11.1, USMARCv1.0), human (GRCh38.p12) and mouse (GRCm38.p6)  
 975 assemblies.

976

|                          | Sscrofa10.2                       | Sscrofa11.1          | USMARCv1.0           | GRCh38.p13                      | GRCm38.p6                       |
|--------------------------|-----------------------------------|----------------------|----------------------|---------------------------------|---------------------------------|
|                          | Ensembl (Release 89)              | Ensembl (Release 98) | Ensembl (Release 97) | Ensembl (Release 98)            | Ensembl (Release 98)            |
| Coding genes             | 21,630<br>(Incl. 10 read through) | 21,301               | 21,535               | 20,444<br>incl 667 read through | 22,508<br>incl 270 read through |
| Non-coding genes         | 3,124                             | 8,971                | 6,113                | 23,949                          | 16,078                          |
| small non-coding genes   | 2,804                             | 2,156                | 2,427                | 4,871                           | 5,531                           |
| long non-coding genes    | 135<br>(incl 1 read through)      | 6,798                | 3,307                | 16,857<br>incl 304 read through | 9,985<br>incl 75 read through   |
| misc. non-coding genes   | 185                               | 17                   | 379                  | 2,221                           | 562                             |
| Pseudogenes              | 568                               | 1,626                | 674                  | 15,214<br>incl 8 read through   | 13,597<br>incl 4 read through   |
| Gene transcripts         | 30,585                            | 63,041               | 58,692               | 227,530                         | 142,446                         |
| Genscan gene predictions | 52,372                            | 46,573               | 152,168              | 51,756                          | 57,381                          |
| Short variants           | 60,389,665                        | 64,310,125           |                      | 665,834,144                     | 83,761,978                      |
| Structural variants      | 224,038                           | 224,038              |                      | 6,013,113                       | 791,878                         |

977

978

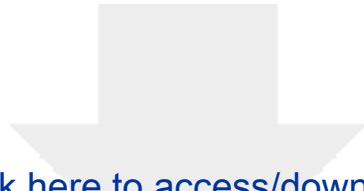

[Click here to access/download](#)

**Supplementary Material**

Pig\_genomes\_suppl\_25032020.docx

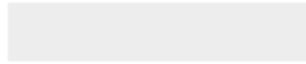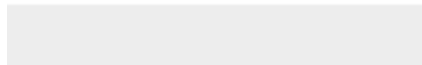



[Click here to access/download](#)

**Supplementary Material**

**TableS11\_Pig\_strains\_annotate.xlsx**



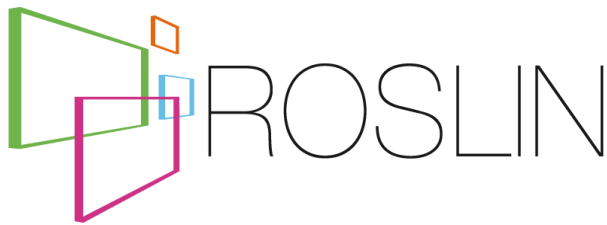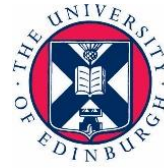

THE UNIVERSITY of EDINBURGH  
The Royal (Dick) School  
of Veterinary Studies

THE ROSLIN INSTITUTE  
The University of Edinburgh  
Easter Bush  
Midlothian  
EH25 9RG  
Telephone: +44 (0)131 651 9100  
[www.roslin.ed.ac.uk](http://www.roslin.ed.ac.uk)

Dear Editors

I am pleased to submit a revised version of the manuscript entitled "An improved pig reference genome sequence to enable pig genetics and genomics research".

We have addressed the comments raised by the reviewers and revised the manuscript as follows:

Reviewer reports:

Reviewer #1:

Mingzhou Li (Reviewer 1): The domestic pig is of enormous agricultural significance and valuable models for many human diseases. Nonetheless, the draft assembly of the reference pig genome (Sscrofa10.2) was incomplete (at least 8% of the sequence is estimated to be missing from the assembly) and limited its utility. The MS entitled "An improved pig reference genome sequence to enable pig genetics and genomics research" reported two annotated highly contiguous chromosome-level genome assemblies (i.e., Sscrofa11.1 and USMARCv1.0) and also presented annotation of a further 11 short read assemblies of representative pig breeds in Europe and Asia. Especially, the updated Sscrofa11.1 (Contig N50 = 48.23 Mb, scaffold N50 = 88.23 Mb,) is substantively superior than the former version of Sscrofa10.2 (Contig N50 = 69.50 Kb, scaffold N50 = 576.01 Kb). To the best of my knowledge, this high-quality assembly of the reference pig genome (Sscrofa11.1, released at Dec 2016) had been widely adapted by the pig genomics community.

I appreciate authors' significant efforts for the pig genomics community, which provide an unprecedented view of the genetic make-up of this important agricultural and biomedical model species. The quality of the presentation is excellent, the structure of the presentation is clear and there are a very small number of typographical errors. Overall the discussions and conclusions appear sound and objective.

Specific comments:

1) Lines 50-51 "The domestic pig (*Sus scrofa*) is important both as a food source and as a biomedical model with high anatomical and immunological similarity to humans".

It is well documented that, compared with rodent, pig is closely comparable to human in size, anatomy, physiology, metabolism, pathology and pharmacology. Why only highlight "immunological similarity" here? As well as in Line 72: "including responses to infectious diseases".

2) Line 123 "MARC1423004 which was a Duroc/Landrace/Yorkshire crossbred barrow (i.e. castrated male pig)" . Is it means the terminal crossbreeding system with three pig breeds, i.e., Duroc x (Landrace x Yorkshire) (DLY). I think the author should provide the accurate description.

3) Lines 220-221 "After correcting the orientation of these inverted scaffolds, there is good agreement between the USMARCv1.0 assembly and the RH map (Fig. 1b)." I suggest the author should provide the exact statistic number to support the statement of "good agreement".

4) Lines 286-287: "There were five genes that were present in the Iso-Seq data, but missing in the Sscrofa11.1 assembly." . I have not find the corresponding description of the method and the more detail results of the "identification of missing genes in the assembly" . I think the author should provide these essential information. Given the volume of information available, it is difficult to assess the methodology.

5) Lines 548-549: "haplotype resolved assemblies of a Meishan and White Composite F1 crossbred pig currently being sequenced." Same as my comment 2), the author should accurately provide description of the sample.

## Responses

### Specific comments:

1) Lines 50-51 *"The domestic pig (Sus scrofa) is important both as a food source and as a biomedical model with high anatomical and immunological similarity to humans"*.

*It is well documented that, compared with rodent, pig is closely comparable to human in size, anatomy, physiology, metabolism, pathology and pharmacology. Why only highlight "immunological similarity" here? As well as in Line 72: "including responses to infectious diseases"*.

We have changed this opening line of the abstract to:

"The domestic pig (*Sus scrofa*) is important both as a food source and as a biomedical model given its similarity in size, anatomy, physiology, metabolism, pathology and pharmacology to humans." (lines 50-51)

We have changed this text in original lines 69-72 to:

In farmed animal species such as the domestic pig (*Sus scrofa*) genome sequences have been integral to the discovery of molecular genetic variants and the development of single nucleotide polymorphism (SNP) chips [1] and enabled efforts to dissect the genetic control of complex traits, such as growth, feed conversion, body composition, reproduction, behaviour and responses to infectious diseases [2]. (lines 69-73).

2) Line 123 *"MARC1423004 which was a Duroc/Landrace/Yorkshire crossbred barrow (i.e. castrated male pig)"*. *Is it means the terminal crossbreeding system with three pig breeds, i.e., Duroc x (Landrace x Yorkshire) (DLY). I think the author should provide the accurate description.*

This statement has been replaced with the following : " MARC1423004 which was a crossbred barrow (i.e. castrated male pig) from a composite population (approximately ½ Landrace, ¼ Duroc and ¼ Yorkshire) at the USDA Meat Animal Research Center." (lines 124-125)

3) Lines 220-221 *"After correcting the orientation of these inverted scaffolds, there is good agreement between the USMARCv1.0 assembly and the RH map (Fig. 1b)." I suggest the author should provide the exact statistic number to support the statement of "good agreement"*.

While the plots demonstrate visually good overall agreement between the RH maps and the assemblies, we have provided statistics showing the finer scale agreement (new Supplementary Table S5). We show the proportion of SNPs whose neighbours are adjacent in both the genome alignment and the RH map.

The additional table is cited in the text as follows:

"After correcting the orientation of these inverted scaffolds, there is good agreement between the USMARCv1.0 assembly and the RH map [9] (Fig. 1b, Table S5)." (lines 224-225).

4) Lines 286-287: *"There were five genes that were present in the Iso-Seq data, but missing in the Sscrofa11.1 assembly."* *I have not find the corresponding description of the method and the more detail results of the "identification of missing genes in the assembly"*. *I think the author should provide these essential information. Given the volume of information available, it is difficult to assess the methodology.*

The 'missing genes' were identified by the Cogent analysis as clearly described in the manuscript in the section headed "Completeness of the assemblies" (lines 268- 295). Each of the missing genes were supported by multiple lines of evidence: (1) there were two or more full-length transcript isoforms, often from multiple tissues, from the PacBio Iso-Seq data; (2) the Iso-Seq transcripts had a BLAST hit to other species that were used to identify the missing gene name as stated in lines 290-295

5) Lines 548-549: "haplotype resolved assemblies of a Meishan and White Composite F1 crossbred pig currently being sequenced." Same as my comment 2), the author should accurately provide description of the sample.

This pig is an F1 between a Meishan and a pig from the USDA MARC composite line (approximately ½ Landrace, ¼ Duroc and ¼ Yorkshire) as for MARC1423004. The text has been modified as follows:

(ii) haplotype resolved assemblies of a Meishan and White Composite F1 crossbred pig (i.e. the offspring of a Meishan sire and a White Composite dam that is approximately ½ Landrace, ¼ Duroc and ¼ Yorkshire) currently being sequenced. (lines 552-554)

Reviewer #2: The authors present us with two high-quality genome assemblies for the pig. In addition to the regular assembly procedure to obtain the two assemblies, they have made great efforts to check the accuracies of both using lots of other datasets, including FISH, radiation hybrid map, BAC clones. I only have several minor concerns as follows:

The authors annotated both the genomes using full-length transcriptome data from a single individual. I wonder whether you have any specific filtering step to avoid incorrect annotations, as the differential expression (both expression level and alternative splicing) may contribute to their phenotypic variances. Line 180 - 190, the authors may want to explain more on the definition of low quality and low coverage regions, e.g. What're your criteria? Besides, please provide statistics of GC content for those remaining LQLC regions to show your points of view better.

For the assembly of USMARC, the authors mentioned that " The resulting assemblies were compared and the Celera Assembler result was selected based on better agreement with a Dovetail Chicago® library," it is better to explain more on your definition for the "better agreement".

Line 235 - 245, identify heterozygous structure variances using long reads can check whether the incongruencies between the v11.1 and v10.2 derived from innate differences between two haploids.

#### Responses

*The authors annotated both the genomes using full-length transcriptome data from a single individual. I wonder whether you have any specific filtering step to avoid incorrect annotations, as the differential expression (both expression level and alternative splicing) may contribute to their phenotypic variances.*

Whilst long read transcriptome data from one individual (i.e. MARC1423004 that was the source of DNA for the USMARCv1.0 assembly) was used to annotate the assemblies, short read RNA-seq data from this pig and four Duroc pigs (PRJEB19386, Duroc 21, Duroc 22, Duroc 23 & Duroc 24; see Table S9) was also used by the Ensembl Genebuild team. The NCBI annotation used further short read RNA-Seq data. The Ensembl annotation pipeline, including the filtering steps, is described in the Supplementary materials. There is good agreement between the Ensembl and NCBI annotation. Thus, we are confident that incorrect annotations have been minimised. Significantly more alternative transcripts have been captured in the annotation of the new assemblies. As noted in the manuscript information on expression levels for the Duroc pigs can be accessed through links from Ensembl genes to the EBI Gene Expression Database.

*Line 180 - 190, the authors may want to explain more on the definition of low quality and low coverage regions, e.g. What're your criteria? Besides, please provide statistics of GC content for those remaining LQLC regions to show your points of view better.*

The low coverage and low quality regions are as described in <https://doi.org/10.3389/fgene.2015.00338>. Briefly, Illumina data was mapped to the assembly, filtered to remove multimappers and the coverage over 1000bp windows was calculated. The coverage for each window was normalised for GC content. Regions deemed LQ were windows that had coverage more than 2 std above the median after normalisation for GC content, where the count of reads that were not properly paired was 2 std above the mean, or the number of reads with unexpectedly large/small insert sizes was 2 std above the mean. The LC regions were windows that had coverage more than 2 std below the median after normalisation for GC content. The LC regions are given separately because they are more likely to include, for example, repetitive regions where multimappers are more likely to have been, or regions of extreme GC content which had such low coverage to begin with that the normalisation was

insufficient to correct this. We therefore have more confidence in the LQ regions representing true misassemblies/structural variation than the LC regions although the drop in LC regions from 10.2 to 11.1 does suggest that for the former assembly many of these were true misassemblies. This description has not been included in the manuscript as it is described fully in the cited paper, however a brief explanation has been added as to what these categories include to make this clearer without having to read the other manuscript (line 182).

The average GC content of the regions was calculated at 61.6%, which indeed supports our suggestion that the remaining regions may relate more to biases in the sequencing technology than actual error, and this has been added to the text on line 189.

Change line 182-183

From: "Alignments of Illumina sequence reads from the same female pig were used to identify regions of low quality (LQ) or low coverage (LC) (Table 2)."

To: "Alignments of Illumina sequence reads from the same female pig were used to identify regions of low quality (LQ; regions with high GC normalised coverage, prevalence of improperly paired reads and prevalence of reads with improper insert sizes) or low coverage (LC; regions with low GC normalised coverage) (Table 2)."

Change old line 187:

From "The remaining LQLC segments of Sscrofa11 may represent regions where short read coverage is low due to known systematic errors of the short read platform related to GC content, rather than deficiencies of the assembly."

To "The remaining LQLC segments of Sscrofa11 have an average GC content of 61.6%. Thus, these regions may represent sequence where short read coverage is low due to the known systematic bias of the short read platform against extreme GC content sequences, rather than deficiencies of the assembly."

*For the assembly of USMARC, the authors mentioned that " The resulting assemblies were compared and the Celera Assembler result was selected based on better agreement with a Dovetail Chicago@ library," it is better to explain more on your definition for the "better agreement".*

The resulting assemblies were compared and the Celera Assembler result was selected based on a lower proportion of conflicting links between read pairs of a Dovetail Chicago library, with fewer suggested breaks in the contigs. The relevant sentence has now been modified.

*Line 235 - 245, identify heterozygous structure variances using long reads can check whether the incongruencies between the v11.1 and v10.2 derived from innate differences between two haploids.*

The very significant reductions in low quality and low coverage regions from Sscrofa10.2 to Sscrofa11.1 (see earlier comment) confirms that Sscrofa11.1 is a significantly better representation of the genome sequence of Duroc sow 2-14. The Sscrofa10.2 assembly was generated from sequences of individual BAC clones and for the region covered by any individual BAC clone captures only one of the two haplotypes for the region. The Sscrofa11.1 assembly was assembled from whole genome shotgun sequence data and switches between haplotypes are more difficult to detect. Thus, any analysis of the haplotypes captured in these two assemblies would be compromised by the differences in sequencing strategy and in quality between the two assemblies.

We have clarified the text to read:

"Both Sscrofa11.1 and USMARCv1.0 assemblies have more differences against Sscrofa10.2 (33,347 and 44,023 respectively) than against each other (28,733). This is despite the fact that Sscrofa11.1 and Sscrofa10.2 represent the same pig genome. While some differences between Sscrofa10.2 and Sscrofa11.1 may be due to differences in which haplotype has been captured in the assembly, the reduction in low quality and low coverage regions and the dramatic decrease in differences versus USMARCv1.0 leads us to conclude that the majority are improvements in the assembly of Sscrofa11.1. The differences between the Sscrofa11.1 and USMARCv1.0 will

represent a mix of true structural differences and assembly errors that will require further research to resolve.”

In addition the results from the Assemblytics comparisons of the 13 pig genome assemblies are no longer available via the Assemblytics website as previously cited in former Table S5. Thus, we have deposited the results files in GigaDB. Chris at GigaDB has confirmed that the files have been uploaded and we are awaiting a DOI reference in order that we can cite these data in the Supplementary materials (see note below Supplementary Table S6).

Yours sincerely

Alan L. Archibald
